# Highly multiplexed selection of RNA aptamers against a small molecule library

Brent Townshend<sup>1¶</sup>, Matias Kaplan<sup>1¶</sup>, Christina D. Smolke<sup>1,2\*</sup>

<sup>1</sup>Department of Bioengineering, Stanford University, Stanford, CA, USA.

<sup>2</sup>Chan Zuckerberg Biohub, San Francisco, CA, USA.

¶ - These authors contributed equally to this work.

\*Correspondence should be addressed to Christina D. Smolke

e-mail: [csmolke@stanford.edu](mailto:csmolke@stanford.edu)

## 16 **Abstract**

17 Applications of synthetic biology spanning human health, industrial bioproduction,  
18 and ecosystem monitoring often require small molecule sensing capabilities, typically in  
19 the form of genetically encoded small molecule biosensors. Critical to the deployment of  
20 greater numbers of these systems are methods that support the rapid development of  
21 such biosensors against a broad range of small molecule targets. Here, we use a  
22 previously developed method for selection of RNA biosensors against unmodified small  
23 molecules (DRIVER) to perform a selection against a densely multiplexed mixture of  
24 small molecules, representative of those employed in high-throughput drug screening.  
25 Using a mixture of 5,120 target compounds randomly sampled from a large diversity  
26 drug screening library, we performed a 95-round selection and then analyzed the  
27 enriched RNA biosensor library using next generation sequencing (NGS). From our  
28 analysis, we identified RNA biosensors with at least 2-fold change in signal in the  
29 presence of at least 217 distinct target compounds with sensitivities down to 25 nM.  
30 Although many of these biosensors respond to multiple targets, clustering analysis  
31 indicated at least 150 different small-molecule sensing patterns. We also built a  
32 classifier that was able to predict whether the biosensors would respond to a new  
33 compound with an average precision of 0.82. Since the target compound library was  
34 designed to be representative of larger diversity compound libraries, we expect that the  
35 described approach can be used with similar compound libraries to identify aptamers  
36 against other small molecules with a similar success rate. The new RNA biosensors (or  
37 their component aptamers) described in this work can be further optimized and used in  
38 applications such as biosensing, gene control, or enzyme evolution. In addition, the data  
39 presented here provide an expanded compendium of new RNA aptamers compared to  
40 the 82 small molecule RNA aptamers published in the literature, allowing further  
41 bioinformatic analyses of the general classes of small molecules for which RNA  
42 aptamers can be found.

43

## 44 Introduction

45 Molecular components that support sensing are critical to many biological systems.  
46 Fitness is often contingent on responding to the presence and concentration of  
47 chemicals in an organism's environment. Natural biological systems have evolved a  
48 diversity of sensor types and corresponding mechanisms. Furthermore, small molecule  
49 sensing capabilities are critical to applications of synthetic biology which span human  
50 health, industrial bioproduction, and ecosystem monitoring [1,2]. As the field explores  
51 greater numbers of these engineered biological systems, methods that can support the  
52 scalable and rapid development of new biosensors that can detect diverse small  
53 molecules are critical.

54 The field has developed a number of different molecular platforms for developing  
55 small molecule biosensors, including engineered transcription factors, enzymes, and  
56 nucleic acid aptamers; however, methods described to-date generally require an  
57 extensive application-specific development cycle for new biosensor components [3–7].  
58 An ideal system for developing small molecule biosensors would incorporate a well-  
59 understood platform that can be used to rapidly screen, either *in silico* or *in vitro*, for  
60 sensors capable of sensing a diverse range of small molecule targets and be easily  
61 tethered to an actuator component that supports both *in vivo* or *in vitro* readout [1,2].

62 Early work in RNA biochemistry led to the development of methods such as  
63 Systematic Evolution of Ligands by EXponential enrichment (SELEX) for the *in vitro*  
64 selection of ligand-binding RNA sequences, or aptamers, from large libraries of random  
65 RNA sequences [8–10]. Since the original description of SELEX, improvements to  
66 support more rapid selection approaches and to enable the generation of aptamers with  
67 greater specificities and affinities have been described. These include changes in library  
68 design, selection strategies, incorporation of modified or unnatural nucleotides, and  
69 computational modeling of selection techniques [11–14]. Despite these advances the  
70 number of ligands that can be sensed by nucleic acid aptamers remains relatively low,  
71 with 168 total small molecule ligands that can be sensed by nucleic acid aptamers  
72 reported as of 2017, 82 of which use RNA as the sensor [13,15,16].

73 Recent work from our laboratory demonstrated a method called *de novo* rapid *in vitro*  
74 evolution of RNA biosensors (DRIVER), which was successfully used to create new

75 small molecule biosensors to six diverse small molecules that previously did not have a  
76 sensor [17]. DRIVER utilizes aptamer-coupled ribozyme libraries and relies on  
77 sequence changes in the ribozyme following cleavage to select for ligand-sensitive  
78 cleavage (Figure 1a). Specifically, DRIVER relies on a unique ribozyme regeneration  
79 step following cleavage to support efficient and unbiased regeneration of active  
80 ribozymes in the pool to enable solution-based separation of RNA biosensors. Further  
81 detail for DRIVER is provided in the results section. We also developed and validated  
82 CleaveSeq, a high-throughput parallelized assay based on NGS, to characterize new  
83 biosensors in parallel by counting cleaved and uncleaved reads for each biosensor  
84 sequence in mixed biosensor libraries. The biosensors selected through DRIVER  
85 exhibit nanomolar to micromolar sensitivities and were also shown to directly function *in*  
86 *vivo* in yeast and mammalian cell systems to regulate gene expression with up to 33-  
87 fold activation ratios [18]. Gene expression can be controlled by placing the ligand-  
88 responsive ribozymes in the 3'-UTR of a target mRNA; when the ribozymes cleave, they  
89 separate the eukaryotic poly-A tail from the rest of the transcript, thereby targeting the  
90 transcript for degradation and lowering gene expression.

91 In this work we explored the utility of DRIVER to be a rapid and efficient generator of  
92 new small molecule biosensors to diverse small molecule compounds. We performed a  
93 DRIVER selection against a library of 5,120 diverse small molecule target compounds  
94 that were selected from a high throughput drug screening library. The compound library  
95 was assembled into mixtures for selection, and the library itself was verified pre- and  
96 post-mixing using liquid-chromatography quantitative time of flight mass spectrometry  
97 (LC/QTOF-MS). After 95 rounds of selection on the DRIVER platform, 334 RNA  
98 sequences were identified as possible biosensors. The small molecule targets of those  
99 potential biosensors were subsequently identified by assessing the activities of potential  
100 biosensor sequences against a set of orthogonal vector mixtures of the small molecule  
101 target library with CleaveSeq [19]. We then validated the ligand responsiveness of these  
102 biosensors in the presence of individual small molecule targets, resulting in identification  
103 of 217 small molecule targets that produce at least 2-fold change in cleavage activity in  
104 response to ligand in one or more of the identified RNA biosensors.

## 105 **Results and Discussion**

### 106 **Hammerhead Ribozyme-Based Biosensor Selection Library**

107 The RNA biosensor library was designed to create a high-diversity library ( $10^{12}$  -  
108  $10^{14}$ ) that could produce small-molecule-modulated, self-cleaving RNA sequences to  
109 new target ligands. The biosensor design is based on the satellite RNA of tobacco  
110 ringspot virus (sTRSV) hammerhead ribozyme (Figure 1b) [20]. The sTRSV  
111 hammerhead ribozyme consists of three helices and two loops surrounding a core. It is  
112 postulated that under physiological low  $Mg^{2+}$  concentrations, tertiary interactions  
113 between the loops stabilize the core, which allows the ribozyme to adopt a catalytically  
114 active form thereby leading to self-cleavage. In our library design, one loop is replaced  
115 with a randomized 30 nucleotide region intended to give rise to aptamer sequences,  
116 while the other loop was replaced with 4 to 8 nucleotide random region intended to  
117 produce tertiary interactions with the sequence on the opposite loop. We have  
118 previously shown that the presence of the aptamer's cognate ligand can interfere with  
119 these interactions and result in modulation of self-cleavage of the ribozyme [17,21]. The  
120 ribozyme-based biosensor sequence is flanked by a 5' T7 RNA polymerase promoter  
121 and an A-rich sequence ("W Prefix") and a 3' distinct A-rich sequence ("X Suffix").  
122 These two flanking sequences are used for manipulating the library sequences, serving  
123 as PCR handles and, by the presence or absence of the W prefix, distinguishing  
124 between cleaved and uncleaved sequences. The RNA biosensor library is synthesized  
125 as DNA oligonucleotides in the antisense direction and annealed to a T7 promoter  
126 oligonucleotide to support T7 RNA runoff transcription of the template for the synthesis  
127 of the corresponding RNA biosensor library.

128

### 129 **Automated DRIVER Selection Allows for Multi-round Enrichment of** 130 **RNA Sensors Against Target Compound Libraries**

131 DRIVER selection was performed on the RNA biosensor library over multiple rounds  
132 to progressively enrich for sequences that exhibit low self-cleavage in the presence of  
133 the target compound library, defined as positive selection, and high self-cleavage in the

134 absence of the compound library, defined as negative selection. DRIVER cycles consist  
135 of four main steps: 1) transcription of the sequences, 2) self-cleavage of the transcripts,  
136 3) reverse-transcription of the transcripts, 4) ligation of a new prefix to cleaved 3'  
137 fragments, and 5) a selective PCR (Figure 1a). For either selection round RNA is  
138 transcribed through an enzymatic *in-vitro* transcription. During positive selection this  
139 transcription occurs in the presence of ligands, while in negative selection no target  
140 ligands are present. Following incubation, any individual RNA sequence will either be  
141 intact or have undergone self-cleavage which removes the prefix sequence. A novel  
142 splint oligonucleotide is combined with the RNA sequences and used as a reverse  
143 transcription primer. Following reverse transcription, cDNA corresponding to cleaved  
144 sequences are ligated to the splint oligonucleotide, replacing the prefix that was  
145 removed by cleavage with a different prefix. The process allows the introduction of  
146 sequences with differing prefixes, which can be used for selective PCR amplification.  
147 During positive selection cycles, PCR is performed with the PCR primers to keep  
148 uncleaved sequences while negative selection cycles incorporate PCR primers that only  
149 amplify cleaved sequences. The cycles then alternate between positive and negatives  
150 selections in order to enrich for biosensors – sequences that cleave in the absence of  
151 ligand and do not cleave in the presence of ligand.

152 The DRIVER selection was performed by beginning with seven rounds of selection  
153 for cleaving sequences in the absence of the target compound library. This initial  
154 enrichment was performed to bias the starting RNA biosensor library toward high-  
155 cleaving ribozyme sequences, as biosensor sequences that do not cleave in the  
156 absence of ligand are unlikely to exhibit a high fold-activation. After this initial  
157 enrichment, alternating rounds of positive selection (i.e., selection of non-cleaving  
158 sequences in the presence of the target compound library) and negative selection (i.e.,  
159 selection of cleaving sequences in the absence of the target compound library) were  
160 performed. Selection after Round 7 was performed in parallel on two independent  
161 series: one using V2560A as the target compound library mixture during non-cleaving  
162 rounds, the other using V2560B as the target compound library mixture. The selection  
163 was then performed for 80 alternating rounds with the target library mixture at 2  $\mu$ M per  
164 compound. Finally, 8 additional alternating rounds of selection were performed where

165 the non-cleaving rounds used the same target mixtures at a concentration of 1  $\mu\text{M}$  per  
166 compound, and the cleaving rounds used the alternate V2560 mixture at 1  $\mu\text{M}$  per  
167 compound. The end rounds of selection were designed to improve the selectivity of  
168 generated biosensors by de-enriching sequences selected to respond to V2560A  
169 components that were also sensitive to components of V2560B and vice versa.

170 As all steps in DRIVER require only liquid movements and thermocycling, the  
171 DRIVER selection process is automated on a liquid-handling robot that can run  
172 continuously multiple rounds/day. However, selection was performed manually for the  
173 first four rounds due to the large solution volumes needed to maintain diversity prior to  
174 enrichment. Subsequent rounds were performed on an automated liquid-handling  
175 system which performed nine rounds of selection per day. After the initial manual  
176 rounds, the enriched biosensor libraries from each round were retained and in intervals  
177 of  $\sim 16$  rounds the concentration of the enriched libraries were checked via qPCR to  
178 verify that the concentration stayed approximately constant, but the selection was  
179 otherwise run blind.

## 180 **Prototype Small Molecule Target Compound Library Designed to** 181 **Mimic Drug and Biologically Relevant Molecules**

182 Testing the limits of DRIVER required us to build a target compound library  
183 comprising diverse small molecule targets that are representative of the breadth of  
184 small molecules for which biosensors might be desired. The target compound library  
185 comprises 5,120 small molecule compounds randomly selected from a ChemDiv  
186 representative diversity library obtained via the Stanford High-Throughput Bioscience  
187 Center [22]. The target compounds ranged in molecular weight from 112 to 500 Daltons  
188 (S1) and were supplied in 5 mM DMSO. The target compound library was reformatted  
189 from the initial set of 16 plates to 2 non-overlapping mixtures of 2,560 compounds each  
190 (“V2560A” and “V2560B”) and 9 sets of 20 non-overlapping mixtures of 256 compounds  
191 each (“V256-1.01” to “V256-9.20”) (Figure 1d). Each of the target compounds in the  
192 256-compound mixtures was chosen randomly with the constraint that no mixture  
193 contained multiple target compounds with overlapping expected m/z mass spectra. The  
194 2,560-compound mixtures were concentrated by evaporation of DMSO to 20  $\mu\text{M}$ . The

195 concentrated mixtures were then further diluted 3x with water and precipitated  
196 compounds were pelleted and removed from the mixtures to reduce any undesired  
197 target compound precipitation that might occur during the DRIVER selection steps.

198 The target compound libraries were validated by mass spectrometry to ensure that  
199 the expected compounds were present following the processing steps to build these  
200 libraries. One hundred of the V256 mixtures, which included each compound in five  
201 different mixtures, were analyzed on an Agilent 6545 Quantitative Time of Flight (QTOF)  
202 mass spectrometer. For each compound, the five V256 mixtures which were expected  
203 to contain that compound were analyzed along with five additional randomly selected  
204 mixtures that should not contain that particular compound. The data were compared to  
205 identify, as possible, a particular adduct and retention time that uniquely correspond to  
206 the compound of interest with minimal false positives or false negatives. The analysis  
207 indicated that one plate of 80 compounds was incorrect, and subsequent analysis  
208 indicated that the plate in question had been mislabeled at some point prior to this work  
209 and contained the contents of the adjacently numbered plate from the original high-  
210 throughput screening collection. The list of compounds used was updated to resolve  
211 this issue without loss of any data. Using this method, over 90% of the compounds  
212 (4,477 of 5,120) were identified (S2 Fig and S1 Table), providing validation that the  
213 expected compounds were indeed present in the mixtures used for selection and  
214 analysis. We postulate that the remaining compounds that were not identified through  
215 this method, comprising ~12% of the target compound libraries used in this study, either  
216 did not ionize in positive mode electrospray ionization or did not produce ion counts  
217 above the noise floor of the instrument.

218

## 219 **Multi-stage CleaveSeq Analysis of DRIVER-Enriched Libraries** 220 **Reveals New Biosensor Sequences**

221 The enriched RNA biosensor library generated by DRIVER was subsequently  
222 characterized using CleaveSeq [17,19] to measure the relative cleavage activity of each  
223 individual sequence in the library in the absence of the target compound mixtures and in  
224 the presence of each of the target compound mixtures (V2560A, V2560B). For each



225 condition, the RNA biosensor library was transcribed to RNA, where each sequence  
226 underwent self-cleavage at the conditions of the assay depending on the particular RNA  
227 sequence and target compounds present. The RNA sequences were then reverse-  
228 transcribed and cDNA corresponding to cleaved sequences was ligated to a prefix  
229 sequence distinct from that carried by the uncleaved sequences. The resulting  
230 sequences were barcoded, prepared as Illumina libraries, and were then sequenced.  
231 Counts of the reads corresponding to cleaved and uncleaved products arising from  
232 each library sequence were used to compute the cleavage fraction and fold change of  
233 cleavage for each sequence under each assay condition using the following formulas:

$$\text{Cleavage Fraction} = \frac{\# \text{ of reads cleaved}}{\# \text{ of reads uncleaved} + \# \text{ of reads cleaved}}$$

234

$$\text{Fold Change of Cleavage} = \frac{\# \text{ of reads cleaved}_{\text{without target}} \times \# \text{ of reads uncleaved}_{\text{with target}}}{\# \text{ of reads uncleaved}_{\text{without target}} \times \# \text{ of reads cleaved}_{\text{with target}}}$$

235

236 The CleaveSeq analysis indicated that 334 RNA sequences exhibited a fold change of  
237 cleavage of at least two in the presence of one or both of the target compound libraries  
238 (in each case passing a test of statistical significance with  $p < 1/N$ ; (Figure 2)).

239 A synthesized RNA biosensor pool was designed based on results from the  
240 CleaveSeq analysis of the DRIVER-enriched biosensor libraries. Specifically, the 334  
241 sequences identified as potential biosensors based on the CleaveSeq analysis and  
242 additional sequences that were present at high abundance in either of the enriched  
243 RNA biosensor libraries, were resynthesized using an oligonucleotide array. In all, this  
244 synthesized RNA biosensor pool contained 1,730 sequences. Of these, 168 sequences  
245 with high fold changes of cleavage were selected as “high-interest” sequences. The  
246 high-interest sequences were mixed in the pool with a 10x higher abundance than the  
247 other sequences. Details of the pool selection criteria are contained in S4 Table. Briefly,  
248 sequences were chosen that were either: suspected hits from sequencing selection  
249 rounds, high-abundance sequences, or suspected amplicon sequences. CleaveSeq  
250 characterization was performed on the synthesized RNA biosensor pool under various  
251 conditions and analysis was performed by initial shallow sequencing on an Illumina iSeq  
252 instrument. This approach provided enough reads for characterization of the sequences

253 in the high-interest pool against the set of small molecule vectors. Selected conditions  
254 were then re-analyzed at a higher sequencing depth on an Illumina NextSeq to allow  
255 characterization of the complete synthesized RNA biosensor pool at these conditions,  
256 while improving statistics for the high-interest sequences as described in the next  
257 section.

## 258 **Pooled Target Compound Testing And Deconvolution Identifies 217** 259 **New Small Molecule Biosensors**

260 The CleaveSeq characterization of the RNA biosensor libraries indicate which  
261 sequences have biosensor activity to compounds within the V2560A or V2560B target  
262 compound mixtures, but do not indicate to which compounds in those mixtures.  
263 Performing characterization assays against each of the 5,120 possible target  
264 compounds would be infeasible. Therefore, we took a two-phase approach to identify  
265 the compounds that interact with each sequence of the synthesized RNA biosensor  
266 pool.

267 In the first phase, the synthesized pool was characterized using the CleaveSeq  
268 assay in the presence of each of the 180 256-compound mixtures, V256-{1-9}-{1-20}  
269 (Figure 3). The resulting data were analyzed to identify likely target compounds that  
270 would give rise to the observed patterns of fold change of cleavage. For example,  
271 biosensor 566229815 had a fold change of cleavage of more than 2 only in the  
272 presence of the V256 mixtures that contained compound 167A08, so it was highly likely  
273 that this compound was the cognate ligand for this biosensor. For most of the biosensor  
274 sequences, several of the V256 mixtures resulted in a response, and analysis identified  
275 which components were shared between the mixtures but not present in the mixtures  
276 that did not show an observable response. Biosensor sequences responsive to less  
277 than approximately 10 distinct target compounds could be characterized in this way.  
278 Although the vectors were designed to be orthogonal, if a sequence was responsive to  
279 more than 10 distinct target compounds, then a positive signal would be seen in most if  
280 not all the V256 mixtures. This led to insufficient information to deconvolute which  
281 specific molecules or even how many different molecules the promiscuous sequences  
282 were sensing. Withholding those sequences, we successfully deconvolved sensors for

283 at least 217 different target compounds that at least one RNA biosensor exhibits greater  
284 than two-fold change of cleavage against (S5 Table). Due to our inability to deconvolve  
285 all possible biosensor-ligand pairs from the vector data this is a lower bound on the  
286 number of small molecules from the library that the DRIVER-generated biosensors are  
287 able to sense.

288 In the second phase, CleaveSeq assays were performed on the synthesized RNA  
289 biosensor pool in the presence of the hypothesized target compounds individually. We  
290 tested 255 compounds individually at 10  $\mu$ M concentration. This second phase of  
291 analysis confirmed that at least 217 small molecules had a biosensor with a minimum of  
292 2-fold change of cleavage. These molecules elicited an average fold change of  
293 cleavage of 4.2 in their corresponding biosensors. The maximum fold change of  
294 cleavage observed was 17-fold for compound 127E09 with biosensor 565359918. The  
295 analysis further identified 150 clusters of biosensor sequences, where each cluster  
296 exhibited a statistically different pattern of response to the compounds (Figure 4 and S5  
297 Table). Note that the number of clusters is lower than the number of compounds due to  
298 the existence of groups of compounds that elicit similar responses from all the  
299 biosensors tested.

### 300 **DRIVER-Selected Biosensors Span a Wide Range of Sensitivities**

301 We further measured the sensitivity of the 168 high-interest biosensors in the  
302 synthesized pool to each of the 14 target compounds that ranked highest in terms of the  
303 maximum fold change of cleavage they induced. The CleaveSeq assay was performed  
304 to measure cleavage of each sequence in the set of 168 high-interest biosensors in the  
305 presence of each of these 14 target compounds in a two-fold dilution series down to  
306 concentrations that did not produce a fold-change of cleavage of two or more (Figure 5).  
307 The data indicate that the minimum concentration of a target compound needed to elicit  
308 a two-fold change in cleavage varies from less than 25 nM to more than 5  $\mu$ M. For some  
309 of the target compounds (247E06, 405D09, 247C07, 8G11) all characterized biosensors  
310 show similar responses and sensitivity, quantified by the average standard deviation of  
311 fold-change in cleavage at each concentration being less than 0.5. For the remaining  
312 compounds that effected a fold change of cleavage in multiple biosensors, different

313 biosensor sequences exhibited different sensitivities. For example, 125F11 elicits a two-  
314 fold change of cleavage at 25 nM for biosensor 565770089, but for biosensor  
315 565359918 requires up to 1  $\mu$ M of the target compound. Furthermore, these biosensors  
316 show no sequence similarity in their stem loops and are responsive to distinct sets of  
317 compounds (S5 Table). We predicted the secondary structures for the sequences that  
318 sensed compound 125F11 using Vienna RNAFold [23] (Figure 6). It is interesting to  
319 note that despite the loops being randomly generated, the predicted secondary  
320 structures for biosensors against 125F11 share similarities with previously described  
321 aptamers. Experimentally derived structures for the theophylline, neomycin, and  
322 tetracycline aptamers consist of helices interrupted by an unpaired region, where the  
323 small molecule binds [24–26]. All of the biosensors against 125F11 share this motif in  
324 their loops. The range of fold-change of cleavage observed may be due to specifics of  
325 each biosensors tertiary structure leading to differing binding and cleavage dynamics.  
326 Taken together, the data indicate that the DRIVER method can generate multiple  
327 biosensors that exhibit a range of sensitivities and that likely have different mechanisms  
328 of operation.

329 The DRIVER selection was performed at concentrations of the target compounds of  
330 at least 1  $\mu$ M, resulting in little selective pressure to obtain biosensors that respond to  
331 their cognate ligand at concentrations below that. We expect that conducting additional  
332 selections with the enriched biosensor pools at lower target small molecule  
333 concentrations could be used to further enrich for higher-sensitivity biosensors.

334 To understand whether we were creating selective biosensors we considered the  
335 fold-change of cleavage of biosensors which sensed two or more structurally similar  
336 ligands (Figure 7). Compounds 325H05 and 325B05 share a common pyrido[1,2a]-  
337 pyrimidine core, each with a carboxamide bearing a pendant cyclic group (pyridyl and  
338 chlorobenzyl, respectively, highlighted in Figure 7a). Despite the common core, multiple  
339 biosensors distinguished between the two compounds. Biosensor 565675752 exhibited  
340 a 10 fold-change of cleavage in response to 325H05 vs 1.4 fold-change of cleavage in  
341 response to 325B05, while biosensor 565493161 had a higher fold-change of cleavage  
342 in response to 325B05 vs 325H05 (5.1 and 2.8, respectively).

343 A similar pattern holds for compounds 405D09 and 405G09, which share a common  
344 methyl-triazolo-phthalazine bearing pendant cyclic groups (furan and pyridine  
345 respectively, highlighted in Figure 7b). And for compounds 45G06, 86A04, and 86B04,  
346 all of which share a common chloro-8-methyl-4-methylamino quinoline with an ethyl  
347 carboxylate. Attached to the methylamino are a furan, ethanol, and morpholine,  
348 respectively (highlighted in Figure 7c). Finding multiple biosensors that can discriminate  
349 between two similar compounds supports the ability of this workflow to develop  
350 selective biosensors.

## 351 **Selection Analytics Show Enrichment Profiles of Biosensors and** 352 **Amplicons**

353 We retrospectively examined the selection path of sequences that were responsive  
354 to at least one target compound by measuring their relative abundance at least every  
355 four rounds during DRIVER selection using their NGS read counts (Figure 8). The  
356 analysis indicates that different biosensors arose at different points in the DRIVER  
357 selection process. Some sequences (e.g. 512112258 and 51340007) that were  
358 enriched early in the selection process were de-enriched at later rounds, likely due to  
359 competition from sequences with higher fitness. Also, some sequences (e.g. 565515437  
360 and 565352773) were notably de-enriched between rounds 87 and 95, likely due to the  
361 negative selection pressure against the alternative V2560 compound mixture added in  
362 those rounds. Fitness during selection depends not only on the fold-change of cleavage  
363 exhibited by a sequence, but also the absolute cleavage levels at each condition.  
364 Sequences with fraction cleaved centered around 50% have higher fitness than those  
365 with very high or very low fractions cleaved, as only sequences that cleave during  
366 negative selection rounds and do not cleave during positive selection rounds will survive  
367 the selection.

368 Undesired amplicons remained at low levels throughout the DRIVER selection  
369 process (Figure 8), but note that the enriched biosensor libraries contained many  
370 sequences with an embedded region similar to the last several nucleotides of the  
371 ribozyme. These sequences roughly correspond to the nucleotides that pair with the  
372 reverse transcription (RT) primer (S1 Fig). We postulate that these sequences enable

373 the RNA to fold into a ribozyme-active conformation without using the region that pairs  
374 with the RT primer. The RT primer was designed to bind to parts of stems II and III of  
375 the ribozyme to inhibit its catalytic activity prior to increasing the concentration of  $Mg^{2+}$ ,  
376 which is needed for the reverse transcription step. The sequences which evade this  
377 inhibition can cleave during this RT step, likely giving them a fitness advantage in the  
378 selection process. Although we isolated functional biosensors with and without this  
379 embedded sequence, the properties of these biosensors may differ, e.g., in terms of  
380 their  $Mg^{2+}$  dependence, and the impact of this mechanism may require further study.

### 381 **DRIVER-Selected Biosensors Exhibit a Wide Range of Selectivities**

382 The DRIVER selection strategy employed in this study was designed to efficiently  
383 identify as many biosensors as possible from the RNA biosensor library. Other than the  
384 final 8 selection rounds, enrichment did not depend upon selectivity of the aptamer  
385 sequences to particular target ligands. As a result of the designed selection strategy,  
386 the identified biosensors span a wide range of selectivity, from biosensors that are  
387 sensitive to only a single compound within the target compound library of 5,120 to those  
388 that respond to at least 100 compounds within the library (Figure 10). Although it was  
389 not a goal of this study, we expect that biosensors with low cross-reactivity can be  
390 enriched by appropriate choice of conditions during the negative counterselection  
391 rounds, such as by inclusion of compounds for which low cross-reactivity is desired.

392 Our initial hypothesis was that target compounds with similar structure would elicit a  
393 response in the same biosensors resulting in low selectivity between these target  
394 compounds. For each identified biosensor sequence, the target compounds in the  
395 library to which the sequence was determined to be responsive were compared to  
396 identify any similarity in structure that may indicate a shared substructure that the  
397 biosensor specifically recognizes. The chemical structures are shown in Figure 9 and SI  
398 Data 1. In a few cases there is a shared substructure between the target compounds  
399 that is readily evident. For example, from the data in S5 Table, biosensor sequence  
400 565476652 has a fold change of cleavage of 5.2 and 3.9, respectively, when transcribed  
401 in the presence (at 10  $\mu$ M) of small molecules 125B09 and 125C09, which differ only in  
402 site of attachment of the flanking pyridine rings. Biosensor sequence 565366119 and

403 several others are similarly affected by these two compounds (SI Data 1). Biosensor  
404 sequence 565958337 exhibits a fold change of cleavage of 6.8, 5.4, and 3.3 when  
405 exposed to 247H04, 247E06, and 247C07 (at 10  $\mu$ M), all of which share a common  
406 central substructure.

407 To quantify the degree to which shared substructures explain the cross-reactivity of  
408 the biosensors, we built a predictor of fold-change of cleavage from the fragments  
409 present in each compound. We used the fold-change of cleavage data collected for  
410 single compounds to establish each [biosensor, compound] pair as either a hit (lower  
411 bound of the 90% confidence interval for the fold change  $> 2.0$ ), a miss (upper bound of  
412 the 90% confidence interval  $< 2.0$ ), or indeterminate. We then trained random forest  
413 classifiers to predict each hit or miss using all of the other hit/miss data for that  
414 biosensor via leave-one-out cross-validation. The input to the classifiers was a bit vector  
415 for each compound, other than the one being predicted, indicating the fragments from a  
416 23,595-entry fragment library that were present in the compound's structure. The  
417 random forests were trained using the hit/miss data for each compound, and then used  
418 to predict the classification of each compound. This method was applied to the 107  
419 biosensors with three or more hits of the 150 biosensors that showed distinct patterns of  
420 activation (biosensors with two or fewer hits cannot be modeled in this way due to lack  
421 of training data). We then compared the predictions to the hit/miss measurements and  
422 tabulated counts of false and true positives and negatives for each biosensor (S6  
423 Table). Over this entire population of biosensors, we observed 25,162 true-negatives,  
424 708 true-positives, 154 false-positives, 602 false-negatives, giving an area under curve  
425 (AUC) of 0.77 and a precision of 0.82. That is, in 82% of the cases that the classifier  
426 indicated a hit, the compound was indeed a hit. This experiment establishes a lower  
427 bound on the ability to predict the cross-reactivity of the selected biosensors and their  
428 response to other compounds—future experiments that focus on exploring other  
429 machine learning models and methods or the use of other feature sets may obtain  
430 higher performance.

## 431 **Conclusions**

432 Through this work, we have demonstrated the flexibility of DRIVER to select for  
433 multiple small molecule compounds in parallel. We have generated RNA biosensors

434 that can detect 217 new small molecules, more than doubling the number of small  
435 molecules that can be sensed by a known nucleic acid aptamer [13]. The small-  
436 molecule compound library was designed for drug screening and its members are  
437 structurally similar to many natural and synthetic molecules of interest. The RNA  
438 biosensors we identified can each sense one or more small molecules with 2-fold to 14-  
439 fold change of cleavage activities and exhibit high nanomolar to millimolar sensitivities.  
440 We also implemented various improvements to the DRIVER protocol including negative-  
441 selection protocols, rapid amplicon identification and mitigation, and rapid identification  
442 of small molecule targets in a large mixture through vector-based CleaveSeq.  
443 Additionally, we developed methods to handle mixing and deconvolving large small  
444 molecule compound libraries using liquid handling robots and LC-QTOF/MS for  
445 validation.

446 Earlier work demonstrated that biosensors generated via DRIVER can function as  
447 selective *in-vivo* sensors of small molecule concentration [17]. The work described here  
448 provides a proof of concept for selecting hundreds of small-molecule biosensors at once  
449 using DRIVER. Using this approach it may, for example, be possible to efficiently create  
450 RNA biosensors against all members of a metabolic pathway for real-time tracking of  
451 natural-product production [27]. Although the metabolites in a metabolic pathway are  
452 chemically similar, we envision the results of a DRIVER selection serving as the starting  
453 point to fine-tune distinct sequences that sense and distinguish between similar  
454 metabolites. After initial selection, counter-selection, with all-but-one mixes of ligands of  
455 interest can be performed to generate highly selective biosensors. The current  
456 CleaveSeq detection protocol paired with RNA biosensors supports rapid detection of  
457 specific small molecules in a mixed pool. The CleaveSeq reaction occurs in a few  
458 minutes and can be read out through sequencing or detection of RNA fragments [19].  
459 Previous work has demonstrated that selections can be performed *in vivo*, however  
460 these methods are limited in their throughput due to cell density constraints. A possible  
461 application of DRIVER is to use DRIVER output as a starting point for subsequent  
462 rounds of *in vivo* selection to optimize the performance of the biosensors in the desired  
463 host environment [17,18,21]. In this study we demonstrated the feasibility of utilizing



464 DRIVER-selected RNA biosensors in mixtures with multiple small molecules,  
465 demonstrating their ability to be highly selective in a heterogenous population.

466 In addition, the ability for one RNA biosensor sequence to sense multiple different  
467 molecular structures (Figure 9) may allow for the creation of an RNA based in-solution  
468 electronic nose device in future work [28,29]. Such devices utilize detectors that are  
469 sensitive to multiple small-molecule features at differing levels. By carefully measuring  
470 and calibrating sensitivities to known mixtures of small molecules it may be possible to  
471 quickly identify and deconvolve a new mixture.

472 In this study we successfully measured and deconvolved sensors against 217  
473 small molecules. A fundamental question is what limited the number of sensors  
474 generated given the large size of our small molecule compound library. We consider  
475 three main possibilities for this: that only ~4% of the molecules in the library are  
476 amenable to sensing by an RNA aptamer; that the parallel selection process employed  
477 results in a subset of the possible sensors masking other sensors that may be enriched  
478 more slowly; or that if we had continued running DRIVER or modified the selection  
479 conditions, we would have continued to find new biosensors. Thorough systematic  
480 examination in future work will be directed to resolving this question.

481 One main objective of this work was to apply the DRIVER approach to generate  
482 many biosensors in single selection experiments. The selection methods were not  
483 optimized for obtaining highly selective aptamers, including aptamers against one  
484 unique target small molecule, or refined to increase sensitivity. We expect that the  
485 sensitivity of the resulting biosensors could be increased by systematically lowering the  
486 concentration of the target small molecules in later rounds of selection. We also expect  
487 that the selectivities of the resulting biosensors can be tailored with the addition of  
488 distinct set(s) of small molecules to the negative selective rounds. For example, if the  
489 biosensors are ultimately intended for use in yeast cell applications, negative selection  
490 rounds can be performed to compound mixtures containing small molecules commonly  
491 found in yeast cytoplasm. These subsequent selection rounds would focus on removing  
492 any biosensors which are also sensitive to cellular ligands, thus making them more  
493 selective. Another situation where negative selection rounds may be used is to select  
494 against biosensors which respond to commonly found small molecule backbones. When

495 selections are performed against large ligand libraries there will be shared chemical  
496 substructures between ligands, which can effectively increase the concentration of the  
497 substructure relative to individual full molecules. Future studies may explore if using  
498 common substructures during negative selection rounds would enable the selection of  
499 biosensors that are more sensitive to less common substructures, or even the *entire*  
500 ligand, rather than a substructure. In this study we explored both negative selection and  
501 lowering the concentration of ligands during selection. However, further work is needed  
502 to systematically test and evaluate conditions for sensor enrichment in complex target  
503 compound mixtures.

504 Future work may also be directed to investigating conditions that raise the total  
505 number of new molecular sensors that are enriched. Modified conditions may include  
506 lowering the number of molecules in a compound selection mixture and increasing the  
507 total number of rounds that the selection is run for. Various factors may influence the  
508 enrichment efficiency. For example, it is possible that some sequences in the library  
509 detect functional groups that are shared between different small molecules, such that  
510 these functional groups are at higher concentrations in the mixtures than any individual  
511 molecule, resulting in faster enrichment of these biosensors. This situation may result in  
512 the generation of biosensors that outcompete highly-selective biosensors due to the  
513 higher concentration of shared functional groups in the mixture. A better understanding  
514 of these factors will allow for the design of more effective DRIVER selection protocols  
515 for small molecule biosensors.

516 Our work provides rich data sets (see additional data section) of the activities for  
517 many thousands of RNA-ligand combinations. These data can be used not only to gain  
518 a deeper understanding of directed selection experiments but also to train  
519 computational models. As demonstrated in this work, models can be built to predict the  
520 activity of the selected biosensors to new compounds allowing the biosensors to be  
521 used for other compounds outside the library used for selection. More generally, the  
522 large data sets generated in this study provide an opportunity for further analyses to  
523 gain deeper understanding of RNA-ligand interactions and can be used to train and test  
524 computational predictors of these interactions and/or of RNA structure [30].

525

## 526 **Methods and Materials**

### 527 **Compound Library**

528 Compounds used in this work were obtained (ChemDiv, San Diego, CA) as part of a  
529 custom diversity library and subsequently reformatted by Stanford High-Throughput  
530 Biosciences Center (HTBC) into 384-well plates containing each compound at 5 mM in  
531 DMSO. Sixteen of these plates, uniformly spaced (each 10th plate) from the full set  
532 were chosen to reduce any systematic bias. These plates were then diluted with 95  $\mu$ l of  
533 MeOH to make the volumes more manageable, the various selection and validation  
534 mixtures were created on an automated liquid handler (Tecan Freedom Evo), and then  
535 the MeOH was evaporated by leaving the plates uncovered in a fume hood overnight  
536 (Figure 1c). The selection mixtures were further concentrated by evaporation on a rotary  
537 evaporator (Buchi rotovap connected to Edwards RV8 vacuum pump) at  $\sim$ 0 millibar for  
538 6-8 hours until the concentration exceeded 20  $\mu$ M. Concentration was then adjusted to  
539 20  $\mu$ M by addition of DMSO.

540 Compounds chosen for source validation (S1 Table) were purchased (Chem-Space,  
541 New Jersey) and suspended at 10 mM by addition of DMSO to 1 mg of compound.  
542 These were then diluted as needed for use in CleaveSeq or QTOF analysis.

### 543 **Sensor Library**

544 The initial library was synthesized by IDT (Integrated DNA Technologies), as 10  
545 separate oligonucleotides, one for each particular set of lengths of the two ribozyme  
546 loops (S2 Table). Note that the library was designed slightly differently from previously  
547 described [17] in that the stem I helix sequence was changed from ACCGGA:TCCGGT  
548 to ACTGGA:TCCGGT. This modification changes one base-pair in the RNA helix from  
549 GC to GU, but otherwise leaves the RNA structure unchanged. However, the change  
550 destabilizes this helix in the single-stranded cDNA following reverse transcription,  
551 improving the ability of the splint oligonucleotides to hybridize with the cDNA. Also, only  
552 N30 aptamer loops were used.

553 Each oligo used hand-mixed degenerate bases (25:25:25:25) for the loops and were  
554 PAGE-purified by IDT. The oligos were suspended in duplex buffer (30 mM HEPES, pH

555 7.5; 100 mM potassium acetate) at 100  $\mu$ M and then 2  $\mu$ l of each was mixed along with  
556 33  $\mu$ l of the complementary T7 promoter at 100  $\mu$ M (T7p, S2 Table) and an additional  
557 24.7  $\mu$ l of duplex buffer. This mixture was heated to 95°C for 5 minutes, cooled to 58°C  
558 at 0.1°C/s, held at 58°C for 5 minutes and then cooled to 25°C at 0.1°C/s. This 30  $\mu$ M  
559 mixture was then used as input to the first round of selection. The library was  
560 sequenced on an Illumina iSeq sequencer to verify the composition and statistics.

## 561 **DRIVER Selection**

562 The DRIVER method was adapted [17] was modified from previous work. Major  
563 adjustments from the previously published method are outlined in this paragraph and  
564 the full method is described in the rest of the section. The oligonucleotide used for the  
565 reverse transcription priming and ligation of the cDNA products was slightly modified  
566 from the previous method to improve ligation efficiency with the modified stem I  
567 sequence described above (Z\_Splint, W\_Splint; S2 Table) In addition, in the original  
568 DRIVER method a different reverse transcription primer was used in negative selection  
569 rounds since no ligation was needed. However, this may result in enrichment of  
570 sequences that anneal differentially to the different reverse transcription primer  
571 sequences, allowing these sequences to escape the desired selection pressure. In this  
572 work, the same splint oligonucleotide was used for the reverse transcription for both  
573 negative and positive selection rounds, though remained dependent on the prefix of the  
574 template coming into the round.

575 The first round of selection used the sensor library described above, at a final  
576 concentration of 400 nM, in two separate 1 ml transcription reactions. Each  
577 transcription reaction consisted of 9 mM rNTPs (NEB N0466), 10 mM Dithiothreitol  
578 (Invitrogen), and 5 U/ $\mu$ l T7 RNA polymerase (NEB M0251) in 1x RNAPol buffer (NEB).  
579 The transcription reactions were incubated for 145 minutes at 37°C in a thermocycler  
580 and were then combined, mixed and part was immediately used in the next step, with  
581 the remainder stored at -80°C. The concentration of the transcription was measured as  
582 7  $\mu$ M using a Qubit RNA assay (ThermoFisher). A splint oligonucleotide (Z\_Splint. S2  
583 Table, 72  $\mu$ l at 10  $\mu$ M) was then added to 103  $\mu$ l of the transcription reaction and mixed  
584 well. Based on the RNA gain of the transcription reaction and the Poisson sampling

585 statistics, the diversity of the library at this step was approximately  $10^{14}$ . A reverse  
586 transcription master mix was then mixed using 36  $\mu\text{l}$  of Omniscript buffer at 10x, 36  $\mu\text{l}$  of  
587 dNTPs at 5 mM, 57.6  $\mu\text{l}$  of  $\text{MgCl}_2$  at 25 mM, 18  $\mu\text{l}$  of Omniscript enzyme at 4 U/ $\mu\text{l}$   
588 (Omniscript RT Kit, Qiagen), and 37  $\mu\text{l}$  water. The master mix was added to the primed  
589 transcription mix, mixed well, split into 6 tubes containing 60  $\mu\text{l}$  each, and incubated for  
590 60 minutes at 50°C, followed by heat inactivation at 95°C for 2 minutes. The tubes were  
591 combined and all but 5  $\mu\text{l}$  was immediately used in the following step. For the ligation  
592 step, 439  $\mu\text{l}$  of water, 89  $\mu\text{l}$  of 10x T4 DNA Ligase Buffer (NEB, B0202), and 4.4  $\mu\text{l}$  of T4  
593 DNA Ligase at 400 U/ $\mu\text{l}$  (NEB, M0202) were added to the reaction and incubated for 30  
594 minutes at 37°C followed by heat inactivation at 65°C for 10 minutes. All but 5  $\mu\text{l}$  of this  
595 product was then diluted 20x into a PCR reaction that consisted of 1x Taq buffer (NEB,  
596 B9014), 1 mM  $\text{MgCl}_2$ , 200  $\mu\text{M}$  dNTPs (Kapa, KK1017), Hot-Start Taq (NEB, M0495),  
597 0.01 U/ $\mu\text{l}$  USER enzyme (NEB, M5505), 300 nM primers (T7Z and X, S2 Table ), and 2  
598  $\mu\text{M}$  blocking oligo (WBlock, S2 Table ). The mixture was incubated at 37°C for 15  
599 minutes (for USER digestion) and then the following program was run in a thermocycler:  
600 95°C for 30 seconds followed by 9 cycles of (95°C for 30 seconds, 57°C for 30seconds,  
601 and 68°C for 30 seconds) with a final extension of 68°C for 60 seconds. The resulting  
602 product was purified using 4 spin columns (Zymo, DCC-25) to produce the round 1  
603 product.

604 The above method was repeated for six additional rounds of selection, alternating  
605 between the Z\_Splint and W\_Splint RT primers and between the T7Z and T7W PCR  
606 primers since the prefix of the product of each round alternates between W and Z.  
607 During these rounds, the volumes of the reactions were decreased during the T7  
608 transcription to 944, 750, 372, 250, and 125  $\mu\text{l}$  during rounds 2 through 6, respectively.  
609 This procedure was based on the computed diversity of the products such that at least  
610 50% of the sequences present in round 1 that exhibit 70% cleavage should still be  
611 present in the library at round 6.

612 Starting with the product from round 7, two parallel selections, A and B, were run  
613 with V2560A added during the transcription steps in the A selection and V2560B in the  
614 B selection, in each case at 2  $\mu\text{M}$  (total of all compounds) final. Rounds 7 and 8  
615 selected for non-cleavers in the presence of the compounds and subsequent rounds

616 alternated between cleavage selection in the absence of compounds and non-cleaver  
617 selection in the presence of the compounds. Starting with round 88, the compound  
618 concentration was reduced to 1  $\mu\text{M}$  based on the hypothesis that this would help  
619 increase biosensor sensitivity by creating a steeper fitness landscape. Starting with  
620 round 88, the alternate compound mixture (i.e. B for the A selections and vice versa)  
621 was added to the transcription reactions during the negative selection rounds, which we  
622 hypothesized would help increase selectivity by removing biosensors that responded to  
623 compounds in both the A and B groups. Rounds 8 through 95 were implemented on a  
624 liquid handler. Further details of the parameters of each round are shown in S3 Table.

## 625 **Resynthesis of Biosensors**

626 Specific biosensors identified during the selection and subsequent CleaveSeq  
627 analysis were resynthesized on an oligonucleotide array (Agilent, G7220A). The array  
628 contained 1,730 sequences each padded to a length of 158 nt. These consisted of the  
629 desired biosensors prefixed and suffixed with additional sequence (W\_Prefix, X\_Suffix;  
630 S2 Table ), and then surrounded by one of nine different pairs of 24-nt primer sites to  
631 allow selective PCR amplification of specific parts of the library. The library was PCR  
632 amplified using the corresponding PCR primers to form nine sublibraries. These were  
633 further PCR amplified using the T7W and X primers to remove the other priming sites  
634 and add the T7 promoter prefix. The design of each sublibrary and the sequences it  
635 contains are provided in S4 Table .

## 636 **CleaveSeq**

637 Each CleaveSeq reaction begins with T7 transcription of the library to be tested: 20–  
638 100 nM template, 1 $\times$  RNAPol buffer, 9 mM ribonucleoside tri-phosphates (rNTPs), 5  
639 U/ $\mu\text{l}$  T7 RNA polymerase (New England Biolabs), 1 U/ $\mu\text{l}$  SUPERase In (Thermo Fisher  
640 Scientific), and 10 mM dithiothreitol (DTT). The excess rNTPs over standard T7  
641 polymerase conditions result in chelation of most of the free  $\text{Mg}^{2+}$ , providing a rough  
642 approximation to sub-millimolar cellular  $\text{Mg}^{2+}$  concentrations, thereby making the  
643 selection conditions more representative of *in vivo* cellular conditions and reducing the  
644 rate of ribozyme cleavage. The transcription reactions were incubated at 37°C for 15–30  
645 min, during which time the transcribed RNA may undergo self-cleavage depending on

646 the catalytic activity of the particular library sequence. The RNA products from the  
647 transcription reaction were immediately transformed to cDNA in a RT reaction. The RNA  
648 products were diluted 2x and mixed with a reverse primer at 2  $\mu$ M final. Annealing of the  
649 RT primer to the RNA partially unfolds the ribozyme, thereby stopping the cleavage  
650 reaction. For uncleaved selection rounds, the RT primer consisted of the reverse  
651 complement of the expected RNA sequence from the 3' leg of the stem II helix through  
652 the "X" spacer. For cleaved selection rounds, the RT primer was prepended with an  
653 additional sequence to assist in the subsequent ligation step (S2 Table ; BT1316p for  
654 rounds that started with a "Z" prefix, BT1508p for those with a "W" prefix). This mixture  
655 was diluted a further 2x into an Omniscript (Qiagen) RT reaction following the  
656 manufacturer's instructions and incubated at 50°C for 20 min followed by heat  
657 inactivation at 95°C for 2 min. The reaction products were then slow-cooled to 25°C at  
658 0.5°C/s to allow refolding of the cDNA.

659 The reaction was split and run through two separate PCR reactions, one that  
660 amplified the cleaved components with the same splint/reverse transcription  
661 oligonucleotide as was used for selection of "W"-prefixed rounds. The other reaction  
662 amplified the uncleaved components with a "W" prefix. The primers used in the above  
663 PCR reactions included 5'-overhang regions with Illumina adapters and barcodes to  
664 allow each read to be identified as to the assay conditions. In addition to the standard  
665 Illumina index barcodes embedded in the adapters, we also added 1–10 nucleotides of  
666 custom barcode nucleotides between the Illumina adapters and the prefixes or suffixes  
667 (S2 Table ; "NGS Primer"). The variable length barcodes introduce shifts of otherwise  
668 identical sequence positions in the prefix and suffix regions of the DNA being  
669 sequenced, resulting in more equal distribution of the four nucleotides at each position.  
670 This strategy improves the performance of Illumina sequencers' clustering step, which  
671 relies on distinct sequences in adjacent clusters during the first several sequencing  
672 cycles. During the analysis, the number of reads of reference sequences provides a  
673 conversion factor for equating the number of reads with absolute concentration. The  
674 PCR reaction mixtures (1x Kapa HiFi enzyme, 1x Kapa HiFi buffer, 400 nM primers)  
675 were run for 18 cycles (under the following conditions: 98°C for 30s, 57°C for  
676 30s, and 72°C for 30s).

677 The barcoded libraries were mixed in ratios based on the relative number of reads  
678 desired for each library and the libraries were diluted to 4 nM of DNA with Illumina  
679 adapters as quantified by qPCR (KAPA Library Quantification Kit). PhiX was spiked into  
680 the sequencing library at 10–20% of the total library concentration to further improve the  
681 cluster calling of the Illumina pipeline for amplicons. The libraries were sequenced on an  
682 Illumina platform, either MiSeq (using MiSeq Control software v3.0) or NextSeq (using  
683 NextSeq Control software v2.1.0) using 2×75 or 2×150 reads, depending on the data  
684 needs of a particular experiment, in each case using Illumina recommended loading  
685 guidelines.

686 All of the CleaveSeq runs were performed on a liquid handler on up to 48  
687 samples in parallel using the same parameters for all runs, with only the choice of input  
688 template library and addition of compounds varying. The template library under test,  
689 either from a selection round product or synthesized set of oligonucleotides, were  
690 diluted to 1 nM in the transcription reaction to reduce the carry-forward of templates into  
691 the sequencing results. Compounds or mixtures of compounds were added to the  
692 starting wells using 10x stock in 100% DMSO, resulting in 10x dilution into the aqueous  
693 transcription buffer. DMSO alone (with a 10x dilution) was used in reactions that did not  
694 have any compounds added.

## 695 **Next Generation Sequencing of DRIVER Rounds For Biosensor** 696 **Analysis**

697 Ligation products from the CleaveSeq reactions were diluted 25x in TE8 (10 mM  
698 Tris, 0.1 mM EDTA, pH 8) to stop the reaction. The circular DNA resulting from the  
699 ligation reaction was then cut and the splint region excised. This reaction consisted of  
700 0.05U/μl Uracil-DNA Glycosylase (NEB; M0280), 0.1 U/μl Endonuclease IV (NEB;  
701 M0304), 1x ThermoPol buffer (NEB; B9004), and 2 μl of a diluted CleaveSeq reaction in  
702 a total volume of 10 μl. The reactions were incubated for 15 minutes at 37°C and then  
703 heat-inactivated at 85°C for 20 minutes. The advantage of this reaction over the USER  
704 treatment employed during selection is that the 3' end of the products of the UDG (or  
705 USER) reaction have a terminal phosphate that would block subsequent PCR



706 extension. Since subsequent barcoding steps use 3'-blocked primers, the  
707 Endonuclease IV used here is necessary to dephosphorylate the 3' end.

708 The extension reaction is followed by a PCR reaction by addition of 4  $\mu$ l of PCR1  
709 master mix such that the reactions contain the diluted excision reaction, 1x ThermoPol  
710 buffer (NEB, B9014), 1 mM MgCl<sub>2</sub>, 200  $\mu$ M dNTPs (Kapa, KK1017), 2 ng/ $\mu$ l salmon  
711 sperm DNA (LifeTech; AM9680), 200 nM primers, and 1 U/ $\mu$ l HotStart Taq (NEB,  
712 M0495). The primers for this reaction were designed to overlap the prefix and suffix  
713 regions and extend them with Illumina read sequences. Half of the reactions use the  
714 primers WFU, ZFC, and XRC and the other half use WRU, ZRC, and XFC (S2 Table),  
715 where the two sets add the Illumina adapters in opposite orientations, improving  
716 diversity of the final library which in turn improves yield. All of these primers have their  
717 3'-ends capped by addition of a 3-carbon spacer during oligo synthesis to ensure that all  
718 sequence reads resulted from the template sequence and were due to correction by the  
719 primers. These primers were synthesized by IDT and PAGE-purified. The PCR1  
720 reaction was run on a thermocycler as follows: 95°C for 30 seconds followed by 5 cycles  
721 of (95°C for 30 seconds, 57°C for 30 seconds, 68°C for 30 seconds) with a final  
722 extension of 68°C for 60 seconds.

723 The PCR1 reaction was then diluted 10x by addition of water and used as input to a  
724 second PCR reaction to add multiplexing primers. This reaction consisted of 1  $\mu$ l of the  
725 diluted PCR1 products, 5  $\mu$ l of Kapa HiFi Fidelity Buffer, 0.75  $\mu$ l of Kapa dNTP Mix at 10  
726 mM, 0.5  $\mu$ l of Kapa HiFi enzyme at 1U/ $\mu$ l (Roche, KK2103), and 1  $\mu$ l of a dual unique  
727 index multiplex primer pair (NEB; E6440) in a total reaction volume of 25  $\mu$ l. The PCR2  
728 reaction was run on a thermocycler as follows: 95°C for 180 seconds followed by 14  
729 cycles of (98°C for 30 seconds, 64°C for 30 seconds and 64°C for 30 seconds) with a  
730 final extension at 72°C for 60 seconds.

731 The PCR2 products were purified using a 1.8x SPRI cleanup (Omega Biotek;  
732 M1378) following the manufacturer's protocol. These were then quantified by qPCR  
733 using a KAPA Library Quantification Kit (Roche; KK4844) on a BioRad iCycler. Multiple  
734 products with distinct index sequences were then mixed in ratios depending on the  
735 relative read counts desired. Sequencing was performed on either an iSeq 100 or  
736 NextSeq 550.

## 737 **CleaveSeq Analysis**

738 Sequencing data was demultiplexed using the index codes and paired ends were  
739 assembled using PEAR [31]. Custom software was used to reduce these data to a list of  
740 the distinct sequences with total read counts for each. Prefix, suffix, and ribozyme  
741 regions were then identified and combined to give a count of reads for each distinct  
742 ribozyme with each prefix. Since the W prefix reads corresponded to uncleaved  
743 ribozymes and the Z prefix ones corresponded to the cleaved ribozymes, the ratio of  
744 these reads was used as an estimate of the cleaved:uncleaved fraction for each  
745 sequence. Fold change of cleavage was then computed as the ratio of these fractions  
746 over two conditions; typically a condition that included an added compound compared to  
747 one with no additions. Slight variations in ratios due to sequencing biases were  
748 corrected by use of reference sequences that were known to not be affected by the  
749 difference in conditions.

## 750 **Mass Spectrometry**

751 The compound library was analyzed by LC-MS using an Agilent 6545 Q-TOF mass  
752 spectrometer with Agilent 1290 Infinity II UHPLC (Stanford ChemH Metabolomics  
753 Knowledge Center). Chromatography was done on a ZorbaxRapid Resolution High  
754 Definition Column, 1.8  $\mu\text{m}$  (Agilent) column with HPLC-grade (Thermo-Fisher) water  
755 with 0.1% Formic acid as solvent A and HPLC-grade acetonitrile with 0.1% formic acid  
756 (Thermo-Fisher) as solvent B. A volume of 10  $\mu\text{L}$  of sample in DMSO were injected  
757 between 250 nM and 1  $\mu\text{M}$ , and run at a constant rate of 0.4 mL per minute at 40°C.  
758 Separation was performed with the following gradient: 0-18 min, 3-50% B; 18-27 min,  
759 50-97% B; 27-30 min, 97% B; followed by a 5 minute equilibration at 3% B. LC Eluent  
760 was sent to the MS starting at 0 min. The MS was in Dual Agilent Jet Stream  
761 electrospray ionization (AJS ESI) in positive mode, source gas temperature at 300°C,  
762 gas flow rate of 11 l/min, and nebulizer pressure of 35 psi. Data was collected using the  
763 MassHunter Workstation LC/MS Data Acquisition software (Agilent). Data files were  
764 converted into mzML format using MSConvert (Proteowizard).

765 Analysis was performed using Matlab, with code available at  
766 <https://github.com/btownshend>.

767

## 768 **Supplemental Information**

769

### 770 **Confirming Small Molecule Library Composition through** 771 **QTOF Mass spectrometry**

772 To spot-check that the selection and subsequent characterizations were not due to  
773 any contaminants that may have been present in the manufacturer's chemical library or  
774 due to subsequent handling, we ran the following control experiment. Small molecule  
775 compounds that produced at least 3-fold change of cleavage in our validation  
776 CleaveSeq runs in any of the tested RNA biosensors and were readily available from  
777 manufacturers other than the original source. Solutions were prepared from new stock  
778 and independently tested using CleaveSeq. We sourced 28 such compounds  
779 independently and ran CleaveSeq assays of the biosensor pool in the presence of each  
780 of these at 10  $\mu$ M concentration and compared the observed fold-change of cleavage  
781 with those using the original preparations of the same compounds (Figure S3). Of  
782 these, 26 showed similar fold-change of cleavage to the original measurements for  
783 sequences that elicited at least 2-fold change of cleavage, with two notable exceptions.  
784 CDIQ165-N09 showed higher cleavage fold-change in the presence of the second-  
785 sourced chemical by approximately 5x and CDIQ125-J17 showed lower cleavage fold-  
786 change by approximately 2.5x. Samples from both sources for each of CDIQ165-N09  
787 and CDIQ125-J17 were analyzed with mass spectrometry. Neither preparation of  
788 CDIQ125-J17 had clear peaks at expected  $m/z$ 's, likely due to the compounds of  
789 interest not ionizing under the conditions used. However, the second-sourced sample of  
790 CDIQ165-N09 showed a clear peak with an  $m/z$  corresponding to an  $M+H$  adduct of the  
791 expected chemical whereas the ChemDiv sample showed no corresponding peak.  
792 Thus, the difference in observed responses is likely due to the expected chemical not  
793 being present in the ChemDiv sample at the expected concentration, possibly caused  
794 by degradation or handling of the library prior to our work. A few other compounds  
795 showed a slight deviation in fold-change of cleavage between the two preparations,

796 likely due to differences in the final concentrations of the compounds. As the compound  
797 library preparation steps required liquid-handler pipetting of volumes in the low  
798 microliters, the limited precision of those transfers introduced deviations in the  
799 concentrations.

800

801

## 802 **Acknowledgements**

803 The authors thank Dr. David Solow-Cordero of the Stanford High-Throughput  
804 Biosciences Center, Dr. Yuqin Liu of the Stanford ChemH Metabolomics Knowledge  
805 Center, and the Pehr Harbury lab for their help.

806

807

808

## Figures

Figure 1

a

### 1) DNA Templates

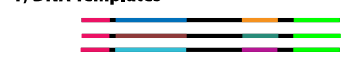

### 2) RNA Transcription and Self-Cleavage

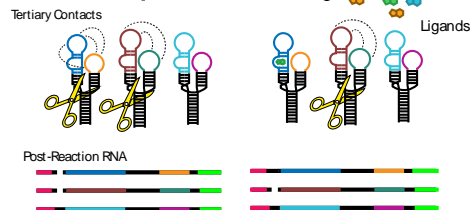

### 3) Reverse Transcription/Ligation

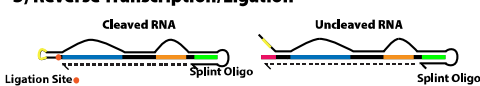

### 4) Selective PCR

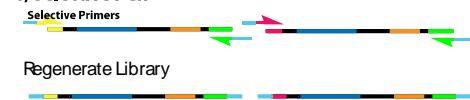

Regenerate Library

Next DRIVER Cycle

Legend: Yellow Z-Prefix, Pink W-Prefix, Green X-Suffix, Black DNA

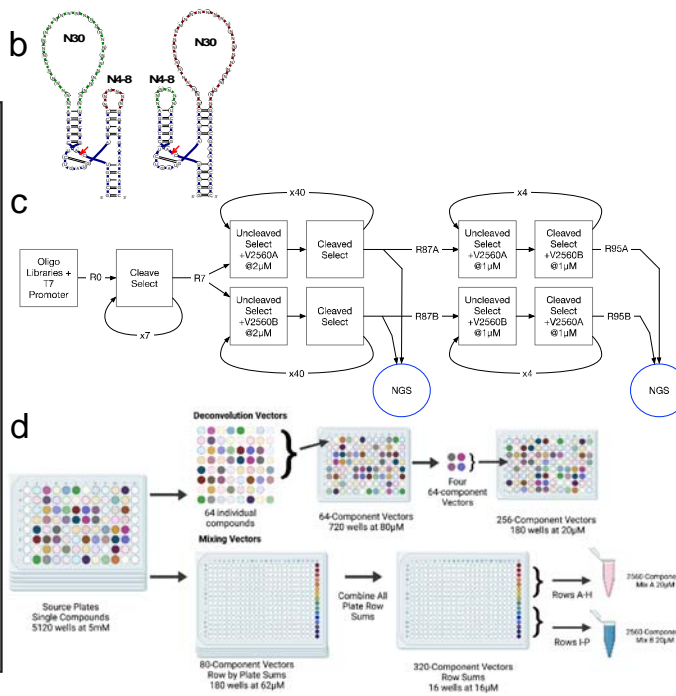

809

810 **Figure 1 – DRIVER Overview and Small Molecule Library Setup (a) Overview of**

811 DRIVER process. Sequences are transcribed in the absence or presence of ligands and

812 allowed to self-cleave. An individual sequence is then either in a cleaved or uncleaved

813 state. At this stage the RNAs are mixed with a splint oligonucleotide whose 3' end acts

814 as a reverse transcription (RT) primer. Following RT, the splint oligonucleotide's 5' end

815 can anneal to the 3' end of the cDNA corresponding to the cleaved sequences such that

816 efficient ligation of a new prefix occurs for the uncleaved sequences. Following RT and

817 ligation, the two prefixes can be used to distinguish between cleaved and uncleaved

818 sequences – either for library regeneration or for quantification. (b) Secondary structure

819 representation of general RNA biosensor library design with the loop randomizations

820 indicated. N6 small loops and N30 large loops are shown. (c) DRIVER selection was

821 performed for 95 rounds of selection followed by NGS analysis of products using

822 CleaveSeq. (d) Source plates containing 5μl per well of 5120 compounds at 5μM in

823 DMSO were reformatted to form two selection mixtures, V2560A & V2560B, and 180

824 256-component mixtures (V256-1-1 to V256-9-20)

825

## Figure 2

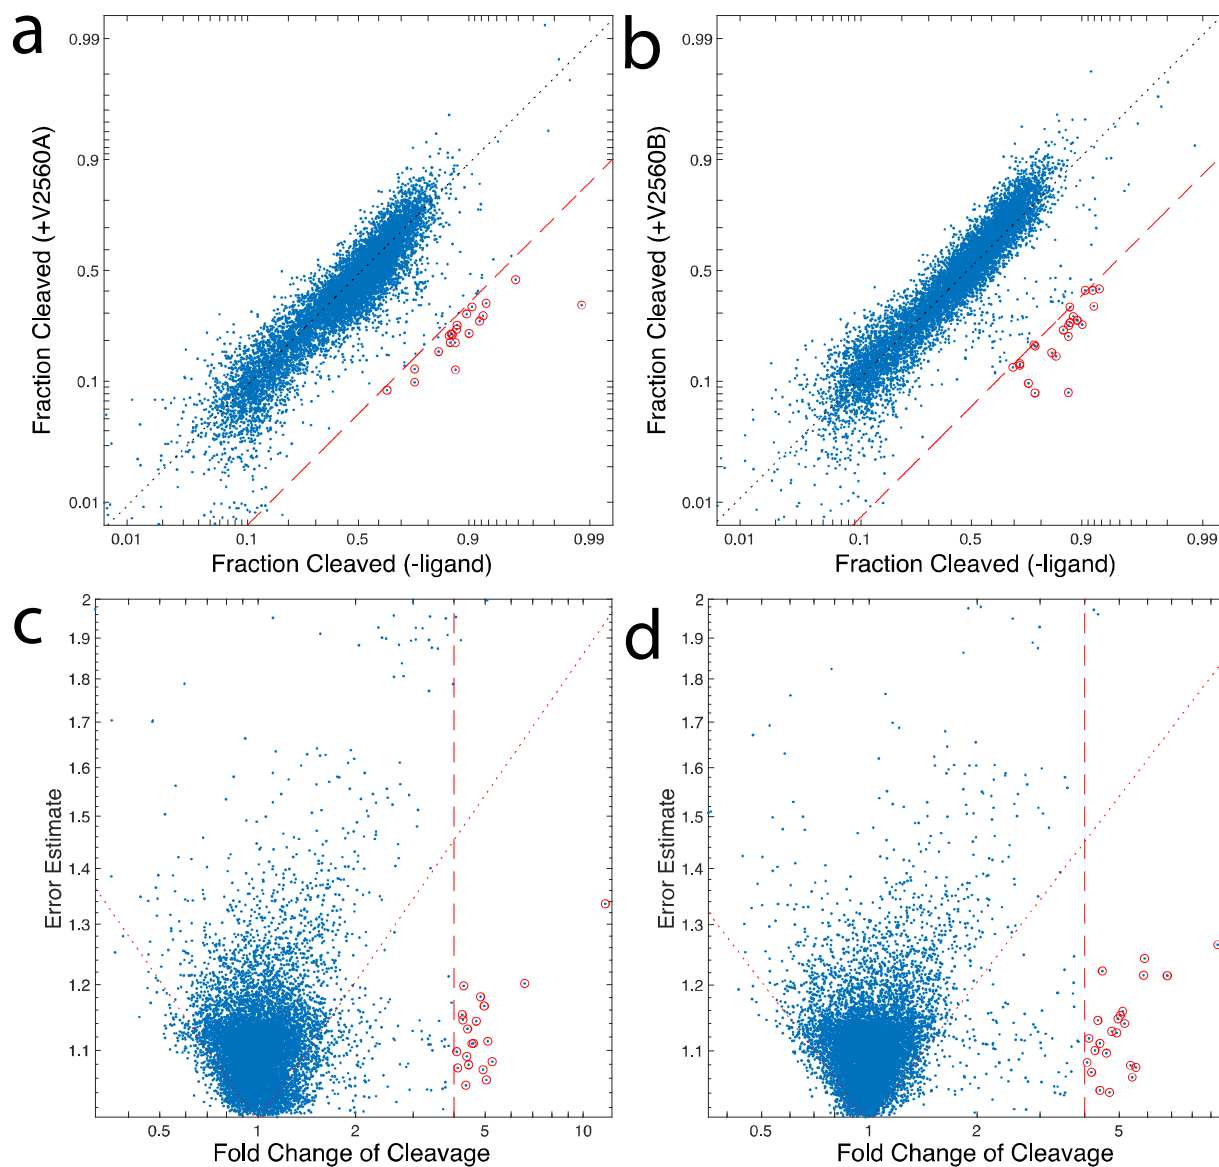

826  
827

### Figure 2 – Identification of Statistically Significant and High Fold-Chance of

828 **Cleavage Biosensor Hits From DRIVER 5120** . Comparison of cleavage fractions for  
829 products of round 95 with and without target mixtures as determined using CleaveSeq.  
830 Left panels (**a,c**) show the response of each sequence to mixture V2560A and the right  
831 panels (**b,d**) to mixture V2560B. (N ~ 10000 sequences, at least 100 reads/sequence in  
832 each analysis). The top panels (**a,b**) show the cleavage of each measured sensor in  
833 each condition and the bottom panels (**c,d**) show the standard error of the  
834 cleaved:uncleaved read count ratio vs. the fold change of cleavage. Significant (two-

835 sided test with Bonferroni correction:  $p < 1/N$ ) outliers are shown with red circles. Red  
836 dashed lines delineate 4-fold change of cleavage. Dotted red lines in bottom panels  
837 show the threshold of significance ( $p=1/N$ ).  
838

## Figure 3

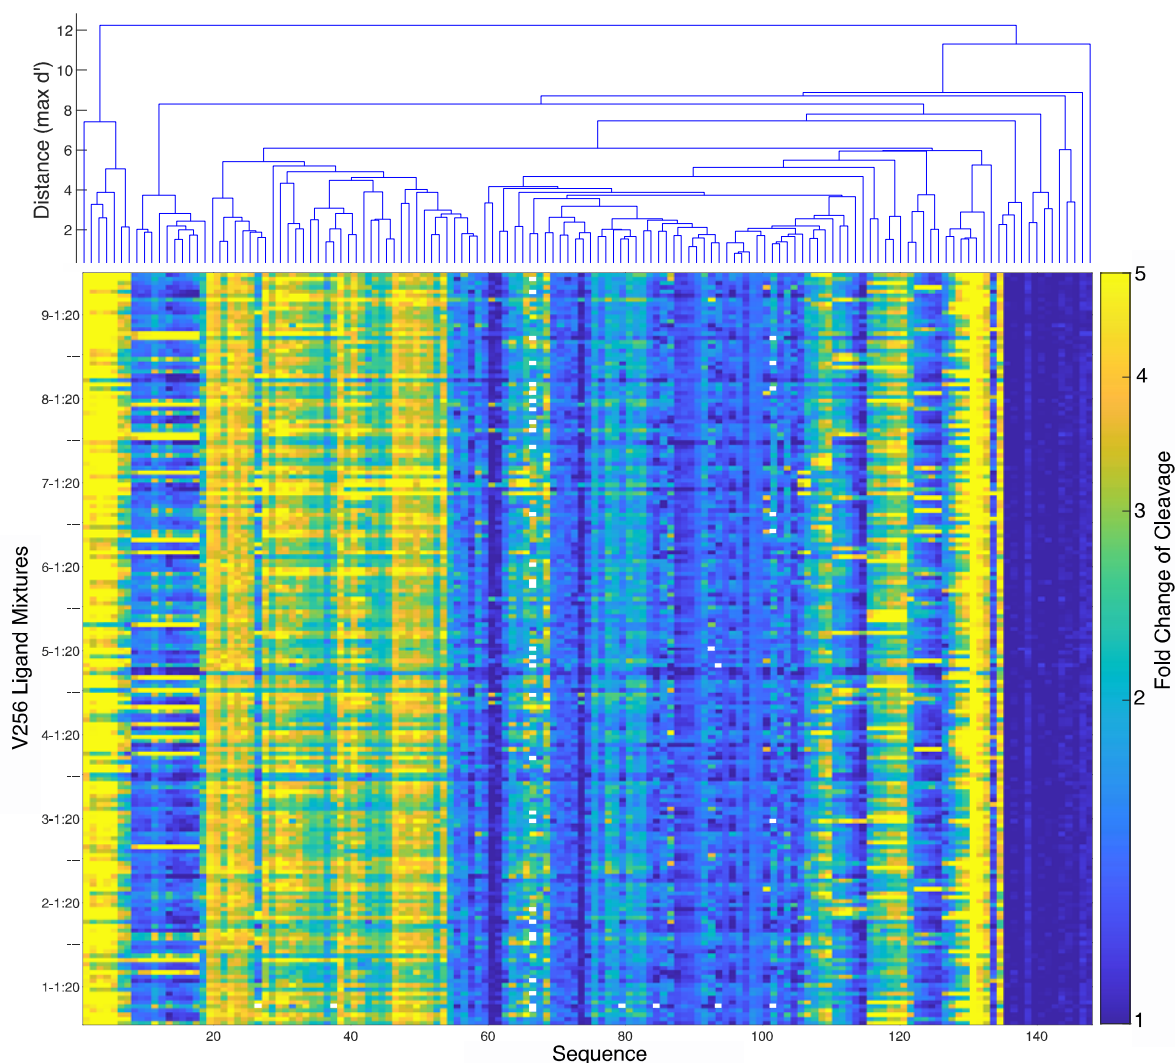

839  
840 **Figure 3 – CleaveSeq Results of Select Biosensors Against Deconvolution**  
841 **Vectors shows Clusters of Similar Biosensors.** The pseudocolor plot shows the fold  
842 change of cleavage for each of 147 sequences (the most-frequent representative of  
843 clusters of sequences that showed similar response patterns) in the presence of each of  
844 the 180 mixtures of 256 compounds, each at  $2\mu\text{M}$  concentration. Sequences are  
845 ordered based on hierarchical clustering of the patterns of response with the

846 dendrogram above showing the response similarities. Dendrogram distances ( $d'$ ) are  
847 the maximum (over all 180 vectors) of the log of the ratio of fold changes divided by the  
848 standard deviation of the estimates.  
849

## Figure 4

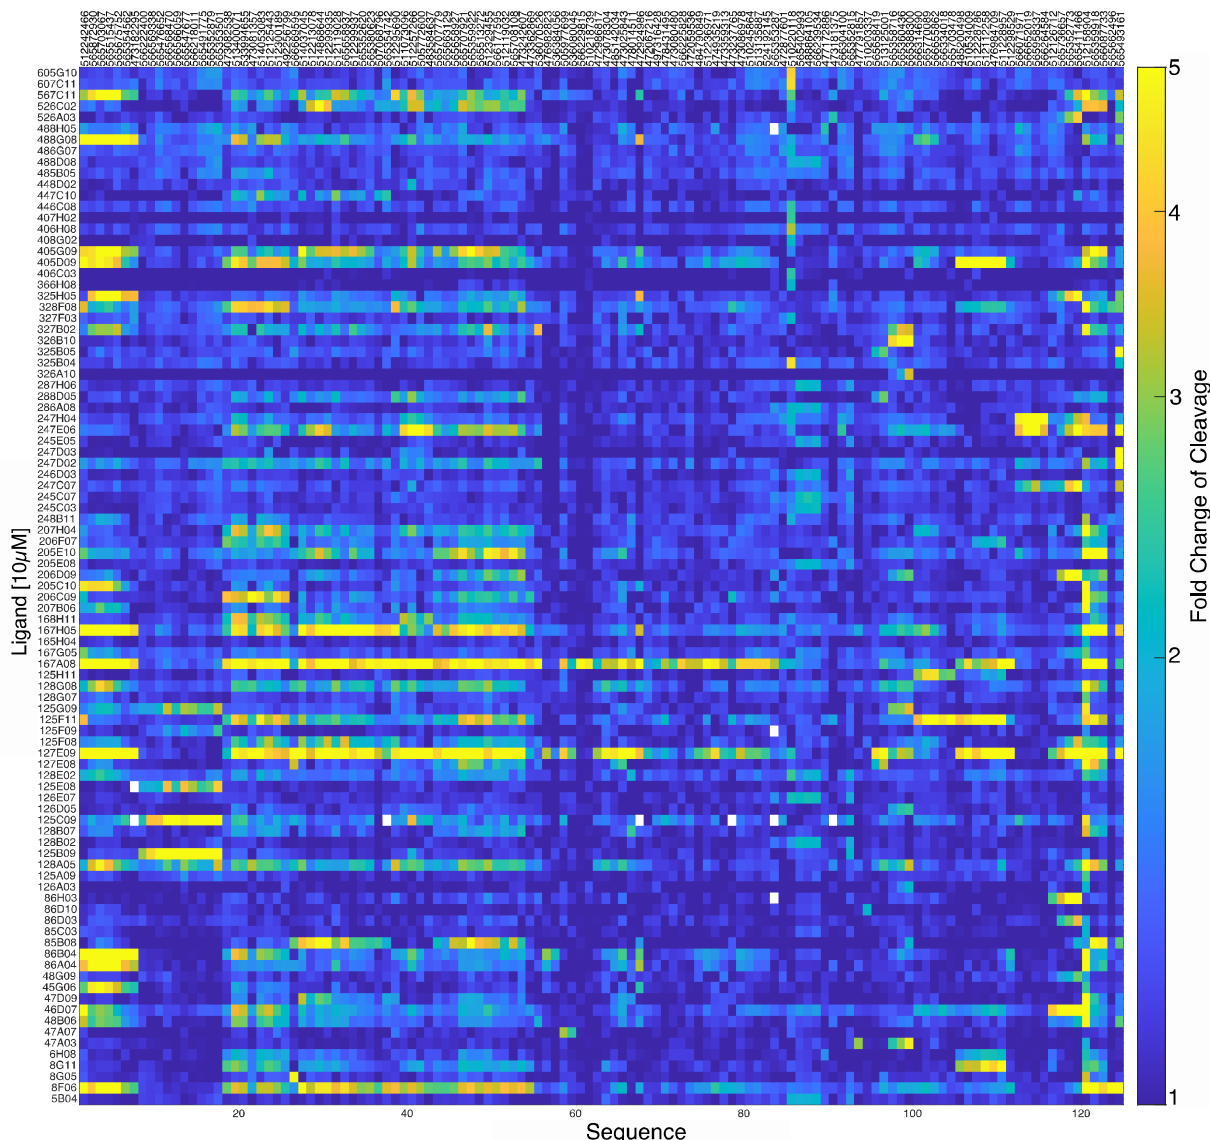

850  
851 **Figure 4 – CleaveSeq of Biosensors Against Individual Compounds Shows**  
852 **Patterns of Promiscuous And Selective Biosensors.** The pseudocolor plot shows  
853 the fold change of cleavage for sensors in the presence of single compounds at 10µM  
854 concentration. Sequences (after clustering as described in text) or compounds that  
855 result in at least 2-fold change in cleavage for at least one combination are shown.



856

## Figure 5

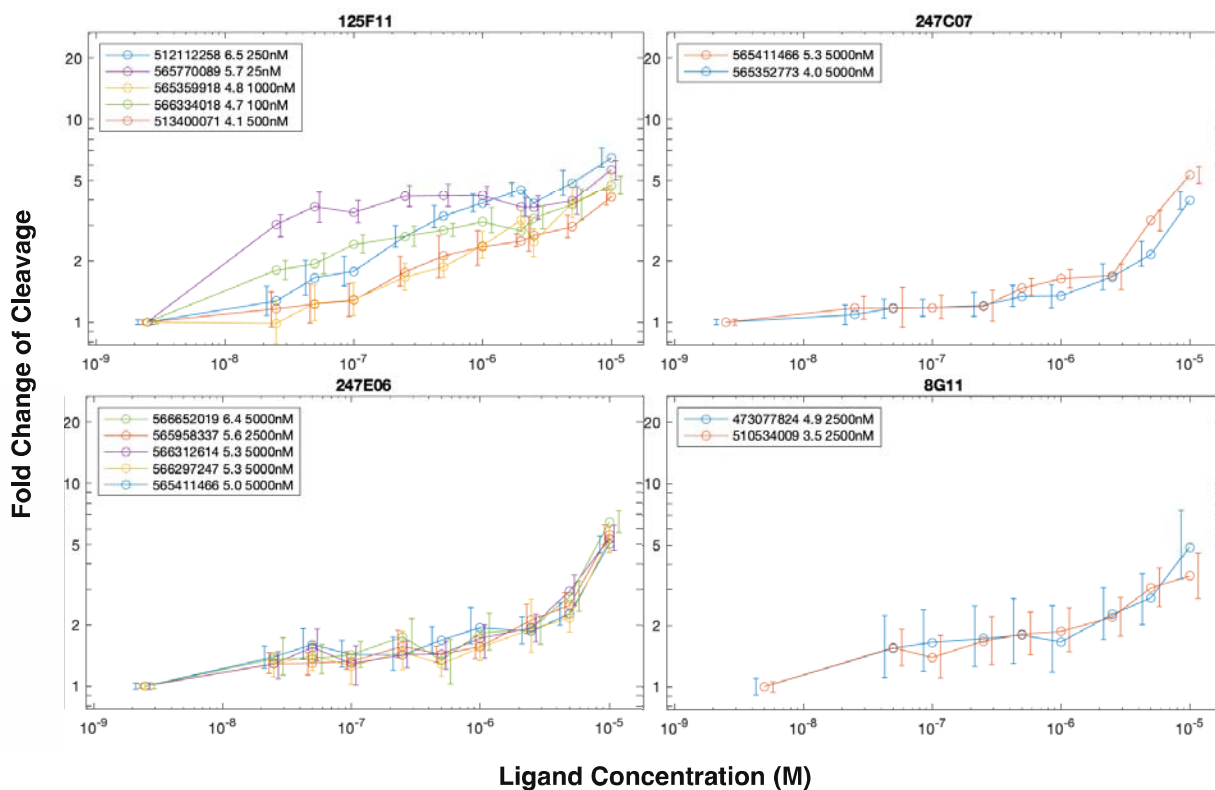

857

858

859

860

861

862

863

864

865

866

867

**Figure 5 – Biosensors Demonstrate a Range of Sensitives.** Fold change as a function of compound concentration is shown for selected aptamer-compound combinations that exhibited at least 3.5-fold change in cleavage at 10μM small molecule concentration. Error bars are 95% confidence intervals based on NGS read counts for single measurements at each concentration. Some measurements were made in parallel by combining up to 4 compounds in the same well, in which case only sequences that were not affected by the other compounds present are shown (based on single-target measurements at 10μM). Legend entries show the sequence IDs, fold change of cleavage at 10μM, and the minimum concentration measured that produces at least 2-fold change of cleavage.

## Figure 6

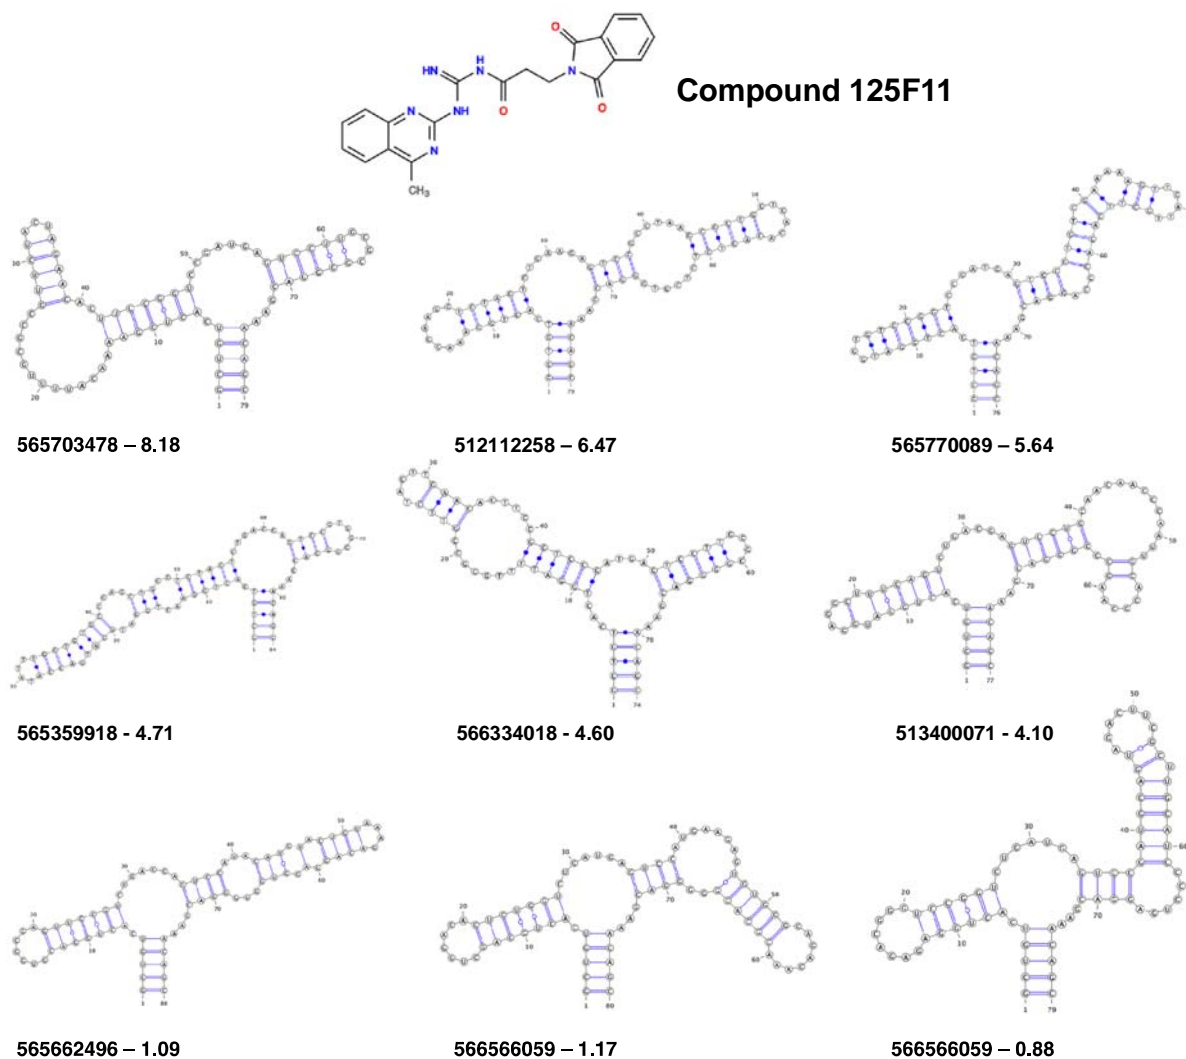

868  
869 **Figure 6 – Biosensor Loops Share a Bulged-Stem Motif.** Secondary structures,  
870 predicted with RNAFold[23], for a subset of biosensors tested against compound  
871 125F11. Biosensors identifier and the fold- change of cleavage at 10  $\mu\text{M}$  are reported  
872 underneath the structures. Top two rows of biosensors had a >4 fold change of  
873 cleavage while the bottom row are examples of biosensors that had fold change of  
874 cleavage ratios of about 1.

**Figure 7**

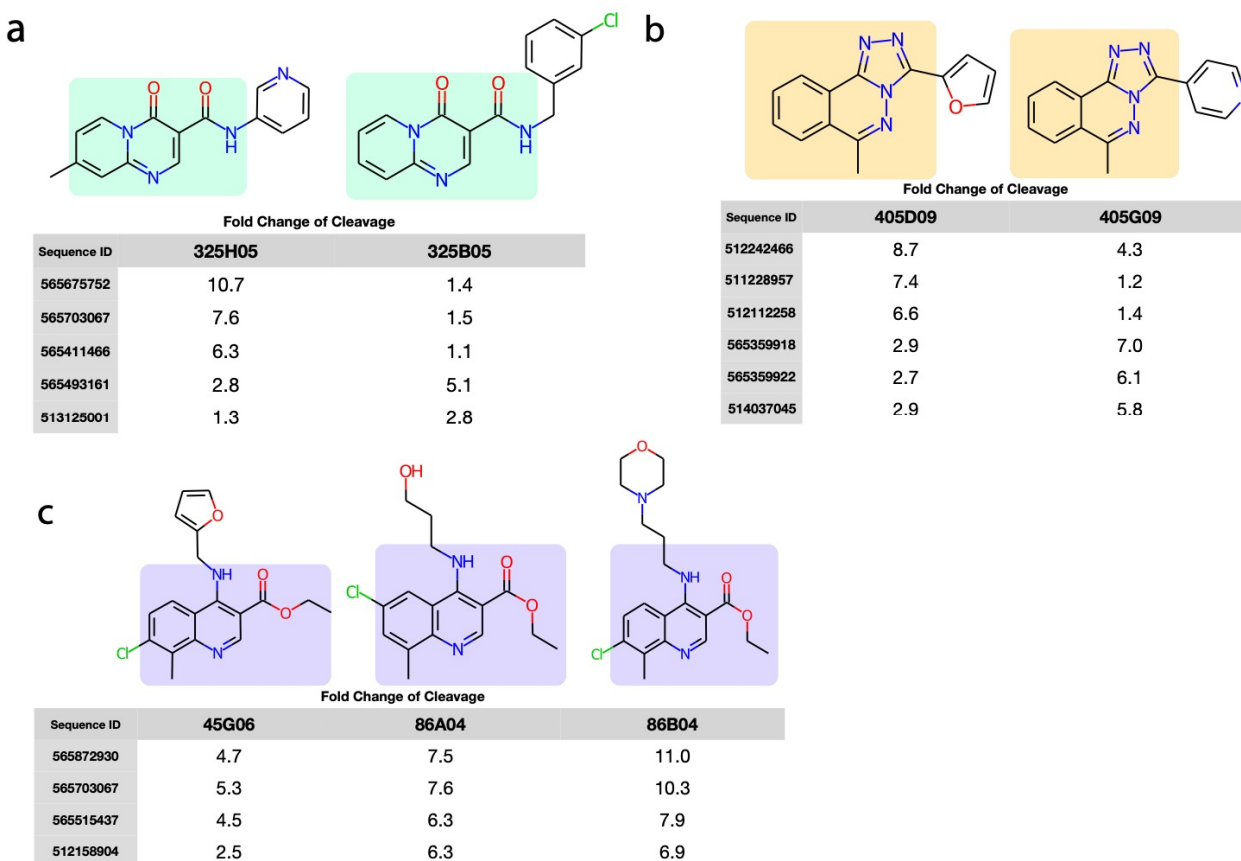

875

876 **Figure 7 – Biosensors Can Discriminate Between Similar Compounds That**

877 **Differ by a Single Functional Group** . Each panel consists of a set of similar

878 compounds and a selection of biosensors that show selective sensing between the

879 compounds. Measurements were taken individually with all compounds at the same

880 concentrations. **(a)** Compounds 325H05 and 325B05 share a common

881 pyrido[1,2a]pyrimidine core each with a carboxamide bearing a pendant cyclic group

882 (pyridyl and chlorobenzyl, respectively). **(b)** Compounds 405D09 and 405G09, share a

883 common methyl-triazolo-phthalazine bearing pendant cyclic groups, furan and pyridine,

884 respectively. **(c)** Compounds 45G06, 86A04 and 86B04, all of which share a common

885 chloro-8-methyl-4-methylamino quinoline with an ethyl carboxylate. Attached to the

886 methylamino are a furan, ethanol, and morpholine, respectively.

## Figure 8

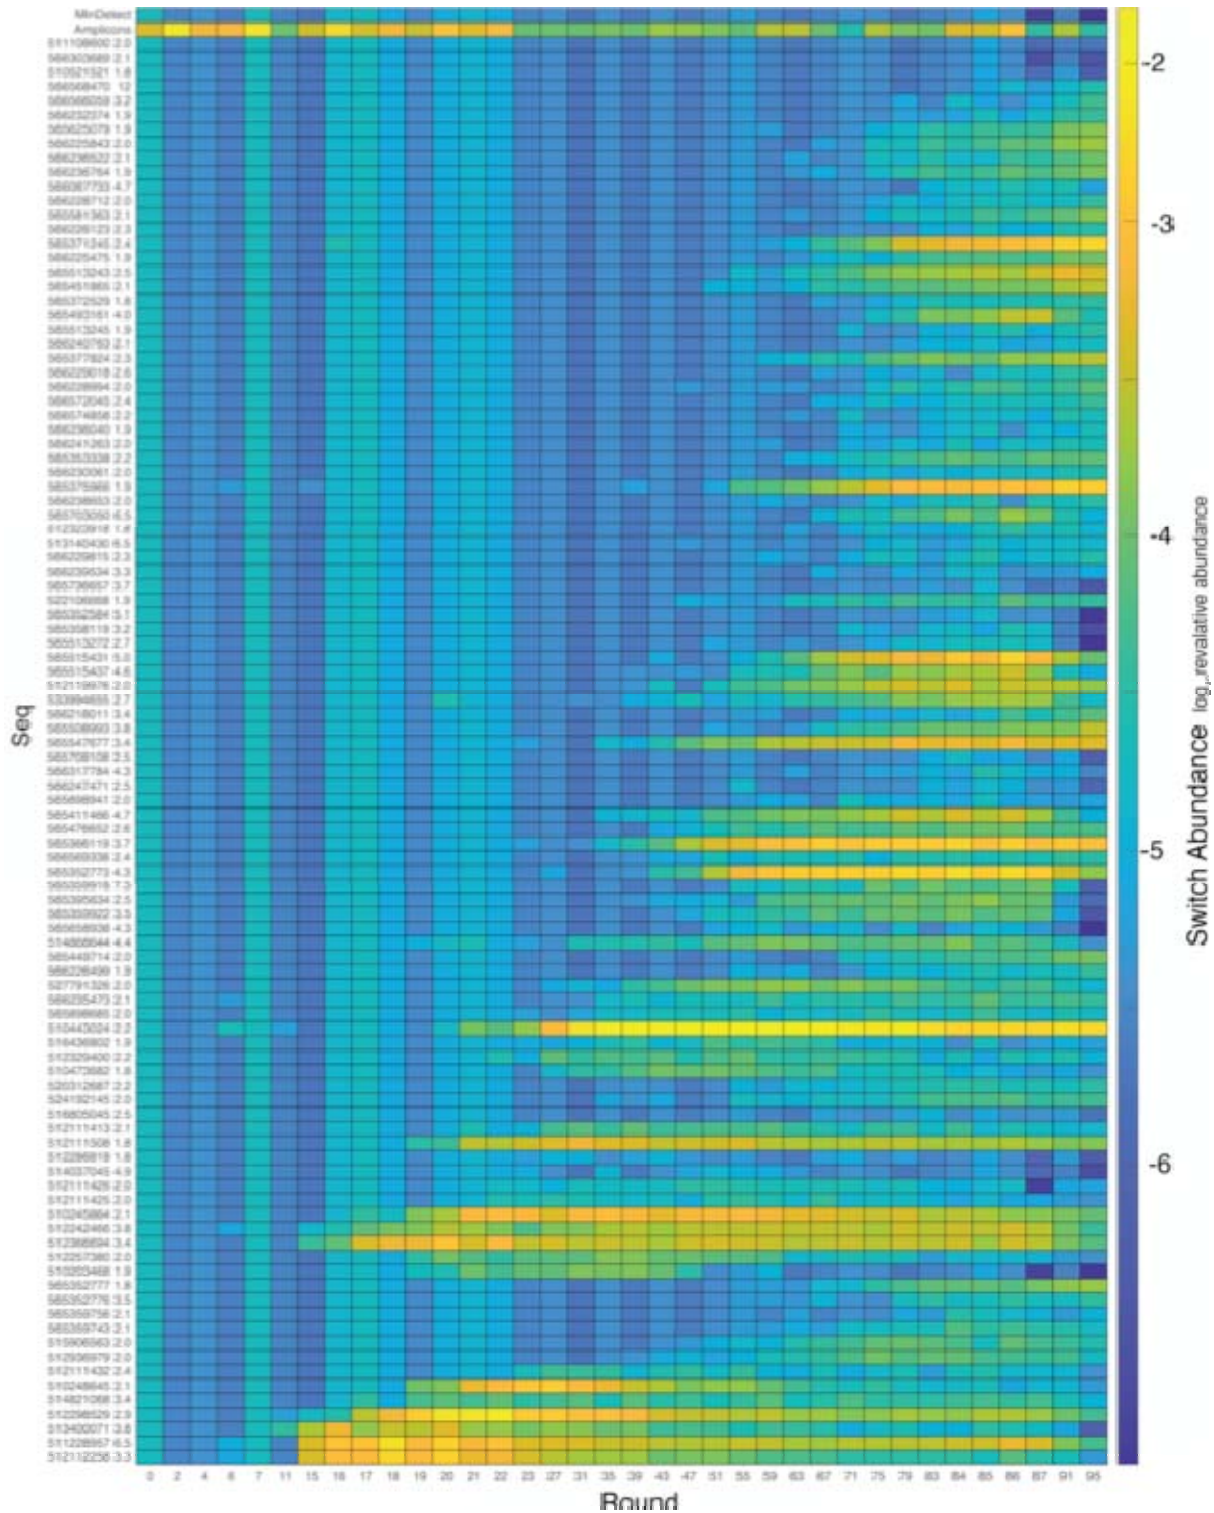

887

888

889

**Figure 8 – Tracking Biosensors Enrichment Over Selection Rounds Reveals Amplicons Make Up Large Portion of Pool Early in Selection Before Being**

890 **Outcompeted by True Biosensors.** Relative abundance is shown over the course of  
 891 the selection as measured by sequencing of the products of the indicated rounds. The  
 892 top row shows the minimum detectable abundance based on the total number of  
 893 sequencing reads for each round, and the second row shows the abundance of short  
 894 amplicons. The remaining rows show the 100 biosensors with the highest fold-change  
 895 of those detected at round 87 or 95. Sequence ID and fold change of cleavage are  
 896 shown along the y-axis labels and the pseudocolor represents  $\log_{10}(\text{abundance})$ .  
 897

## Figure 9

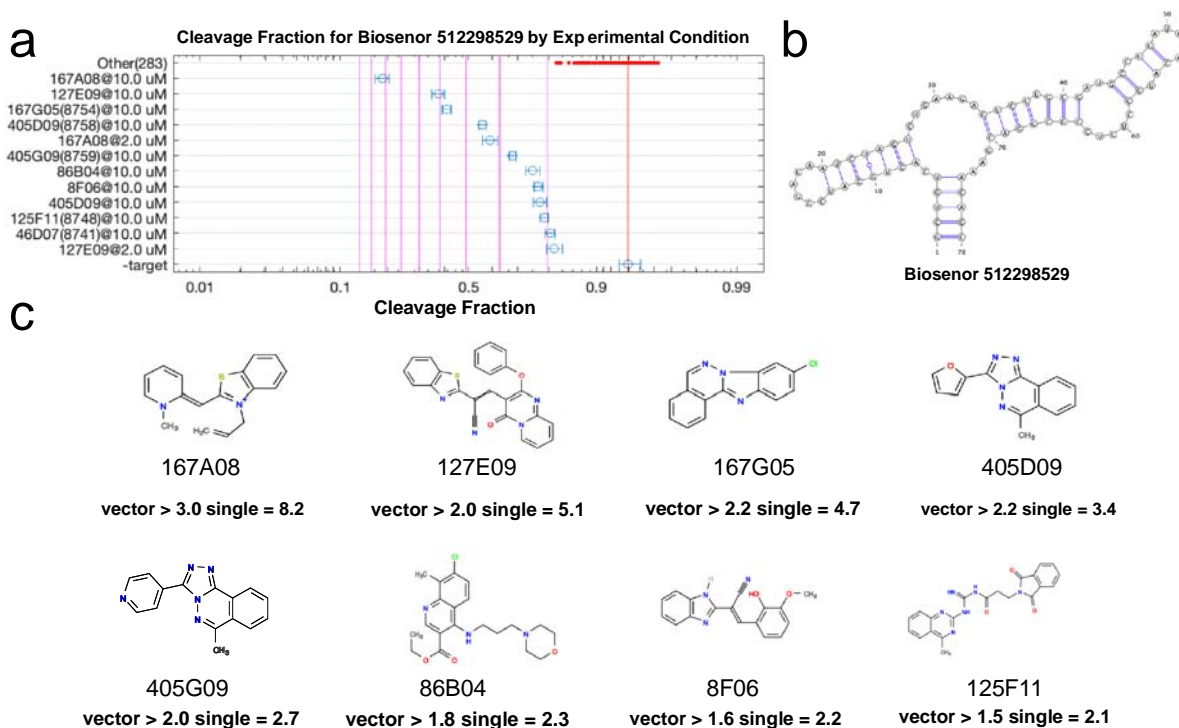

898  
 899 **Figure 9 – Promiscuous Biosensors Can Sense Multiple Diverse Ligands.** For  
 900 each cluster of sequences that have a similar response to the compounds, a  
 901 representative sequence was chosen and shown along with its sequence (one particular  
 902 sequence, 512298529, is shown above and the others in SI Data 1). **(a)** A chart of the  
 903 cleavage of that sequence in the presence of each compound is then shown.  
 904 Compounds that may give rise to a fold change that exceeds 2-fold (upper CI bound  
 905  $\geq 2$ ) are shown explicitly and all others that were individually measured are shown by  
 906 the red points at the top of the chart. Error bars indicate the 95% confidence interval

907 based on read count statistics. Vertical lines indicate the fold change of cleavage from  
908 the no ligand condition. **(b)** Predicted secondary structure of 512298529. **(c)** The  
909 chemical structure of each compound with fold change  $\geq 2.0$  is also shown. The  
910 measured fold change of cleavage are listed below each compound, as derived from  
911 either single-compound measurements (“single”) and as an lower-bound estimate o  
912 from the measurement of fold change of cleavage from the 256-compound vectors  
913 (“vector”).

## Figure 10

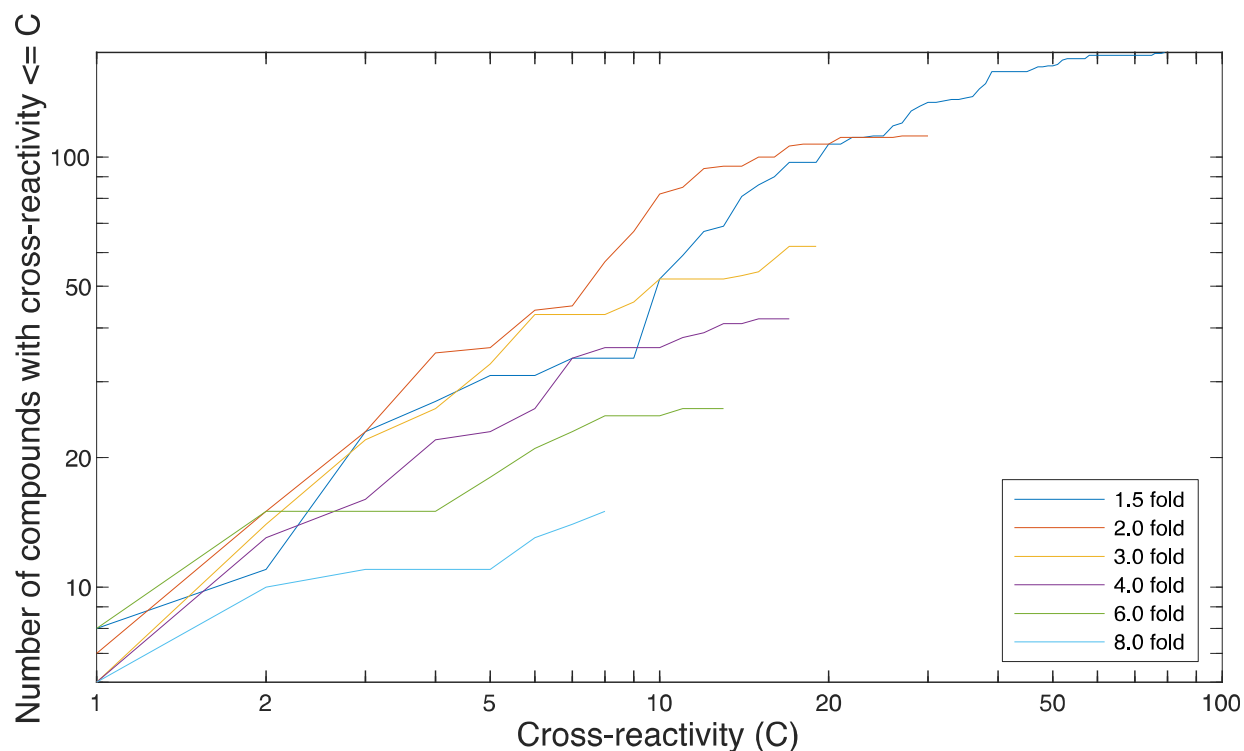

914  
915 **Figure 10 – Selective Biosensors Tend to be More Sensitive.** At a given fold-  
916 change of cleavage,  $f$ , the cross-reactivity of a sensor is defined as the number of  
917 compounds that induce fold-change of at least  $f$ . The cross-reactivity for a compound is  
918 then defined as the lowest cross-reactivity of all sensors that respond to the compound  
919 with fold-change of at least  $f$ . The number of compounds with cross-reactivity less than  
920  $C$  is shown as a function of  $C$ . For example, at  $C=1$ , the lines indicate the number of  
921 compounds that uniquely induce the indicated fold-change in some sensor. As the fold-  
922 change of cleavage increases, fewer molecules cross-react, indicating that more  
923 sensitive biosensors may be more selective.

924  
925  
926

## 927 **Supporting Information**

928  
929

### 930 **Confirming Small Molecule Library Composition through** 931 **QTOF Mass spectrometry**

932 To spot-check that the selection and subsequent characterizations were not due to  
933 any contaminants that may have been present in the manufacturer's chemical library or  
934 due to subsequent handling, we ran the following control experiment. Small molecule  
935 compounds that produced at least 3-fold change of cleavage in our validation  
936 CleaveSeq runs in any of the tested RNA biosensors and were readily available from  
937 manufacturers other than the original source. Solutions were prepared from new stock  
938 and independently tested using CleaveSeq. We sourced 28 such compounds  
939 independently and ran CleaveSeq assays of the biosensor pool in the presence of each  
940 of these at 10  $\mu$ M concentration and compared the observed fold-change of cleavage  
941 with those using the original preparations of the same compounds (Figure S3). Of  
942 these, 26 showed similar fold-change of cleavage to the original measurements for  
943 sequences that elicited at least 2-fold change of cleavage, with two notable exceptions.  
944 CDIQ165-N09 showed higher cleavage fold-change in the presence of the second-  
945 sourced chemical by approximately 5x and CDIQ125-J17 showed lower cleavage fold-  
946 change by approximately 2.5x. Samples from both sources for each of CDIQ165-N09  
947 and CDIQ125-J17 were analyzed with mass spectrometry. Neither preparation of  
948 CDIQ125-J17 had clear peaks at expected  $m/z$ 's, likely due to the compounds of  
949 interest not ionizing under the conditions used. However, the second-sourced sample of  
950 CDIQ165-N09 showed a clear peak with an  $m/z$  corresponding to an M+H adduct of the  
951 expected chemical whereas the ChemDiv sample showed no corresponding peak.  
952 Thus, the difference in observed responses is likely due to the expected chemical not

953 being present in the ChemDiv sample at the expected concentration, possibly caused  
954 by degradation or handling of the library prior to our work. A few other compounds  
955 showed a slight deviation in fold-change of cleavage between the two preparations,  
956 likely due to differences in the final concentrations of the compounds. As the compound  
957 library preparation steps required liquid-handler pipetting of volumes in the low  
958 microliters, the limited precision of those transfers introduced deviations in the  
959 concentrations.

## Figure S1

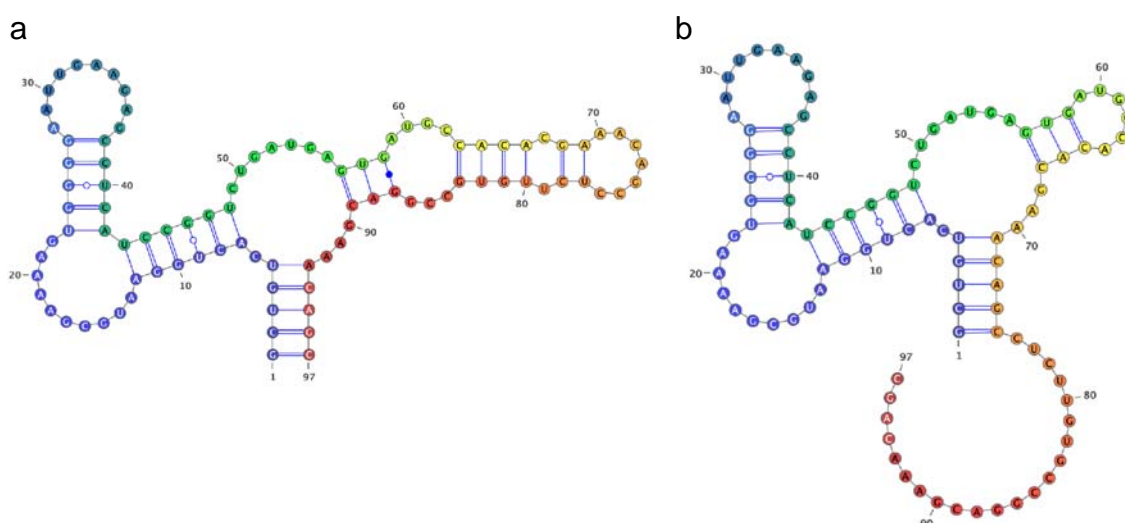

960  
961  
962 **Figure S1 – Bistable Amplicon Sequences Are Capable of Retaining**  
963 **“switching” Capabilities By Encoding for a Shorter Ribozyme.** The sequence  
964 above is representative of several sequences that were enriched early in the selection  
965 and contain a structure that appears to have two stable secondary structures. **(a)**  
966 secondary structure in which all the nucleotides are involved in forming the ribozyme;  
967 **(b)** an alternative secondary structure which leaves the 5' end free to anneal to the  
968 reverse transcription primer without disrupting the ribozyme structure.



## Figure S2

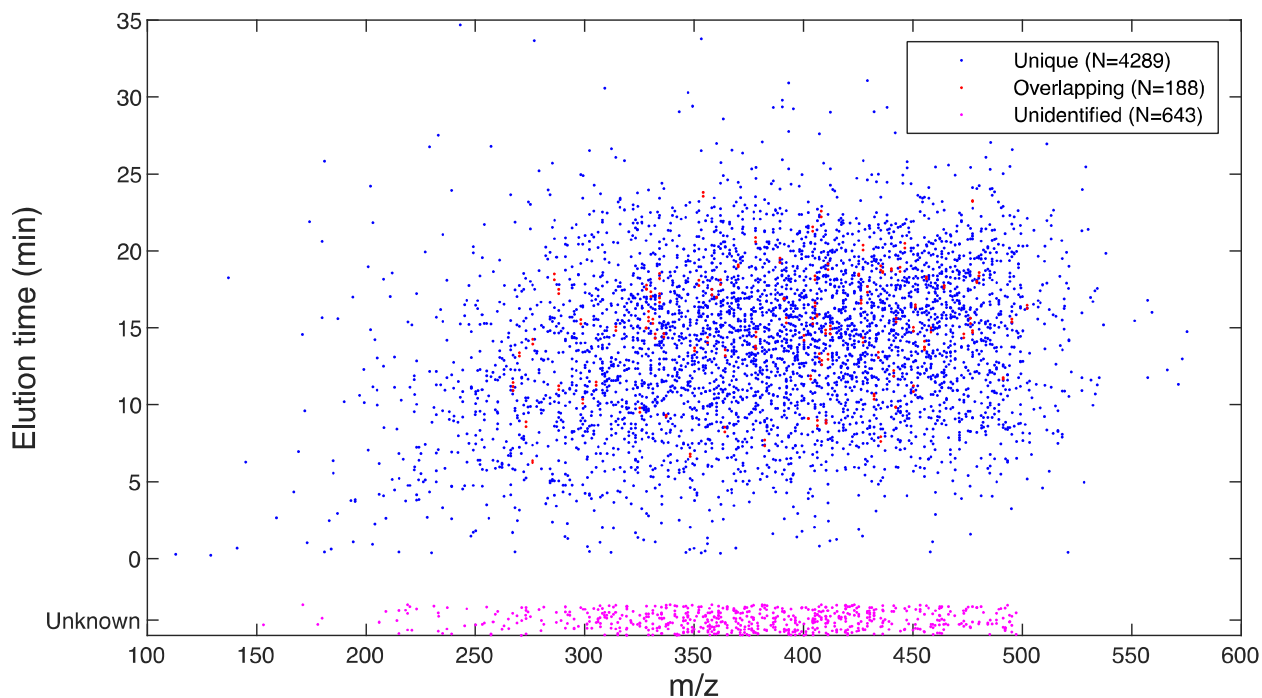

969

970 **Figure S2 – Verification of Compounds by Mass Spectrometry.** The elution time  
971 and m/z of the largest ion count peak matching expected adducts are shown for each of  
972 the compounds that occur in at least 4 out of 5 expected mixtures. Blue points indicate  
973 unambiguous assignments, red points are for compounds that overlap in elution time  
974 and m/z with at least one other compound, and magenta points show compounds that  
975 were not assigned an elution time. Data plotted here is contained in Table 1.

## Figure S3

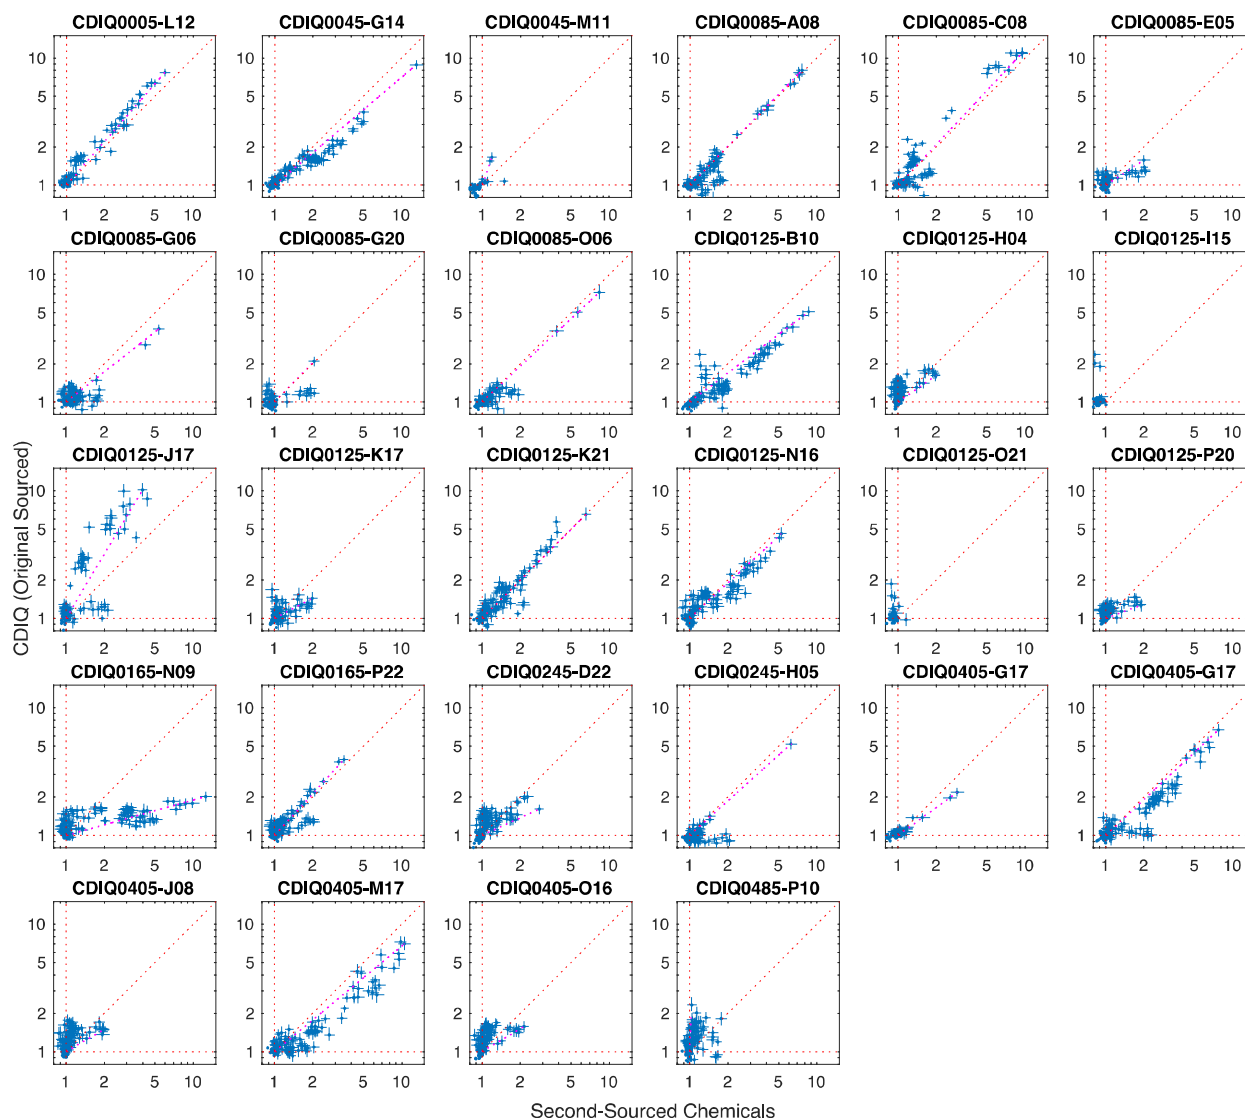

976

977 **Figure S3 – Compound Verification.** Each subplot shows the fold-change of  
978 cleavage of the sequences in the same library in response to two different formulations  
979 of purportedly the same compound. Error bars indicate the 95% confidence interval for  
980 each measurement based on the number of sequence reads; they are shown for  
981 sequences for which the lower-bound of the confidence interval is greater than 1.0 with  
982 either formulation.

983

984 **Table S1 – Table of All Compounds.** Compounds used in this work. Each row  
985 includes: compound ID; SMILES; molecular weight; assignment to selection set A or B;

986 V256 vectors containing the compound; maximum fold change observed when  
987 compound added in isolation at 10 $\mu$ M; minimum fold change observed when any vector  
988 containing the compound was added at 2 $\mu$ M; second source for compound, if any; mass  
989 spec identification (adduct, m/z, elution time, average ion count); number of false  
990 positives in mass spec identification at specified m/z and elution time; flag indicating, for  
991 each V256 group measured on mass spec, whether the compound was isolated.

992

993 **Table S2 – Table of Oligos Used in Manuscript.** Oligonucleotide and primer  
994 sequences used in this work, including ID, name, description, and sequence.

995

996 **Table S3 – Summary of DRIVER Selection Rounds.** Table detailing conditions for  
997 each round of DRIVER selection including: template prefix, template concentration,  
998 whether it was done manually or on the Tecan Freedom Evo (Robot), volume of  
999 transcription reaction, what compounds and at what total concentration were include,  
1000 the splint-oligo used, the reverse-transcription volume, ligation volume, PCR primers  
1001 used and the PCR volume and whether and how the round was cleaned up.

1002

1003 **Table S4 – Table of Oligo Pools.** Oligonucleotide pools and members. The pool  
1004 consisted of seven subgroups, named as shown in column 1. The pools with names  
1005 starting with S7 were selected based on having a fold change of cleavage of at least 2.0  
1006 at round 95 of the selection. For each member of the pool, the sequences and ID are  
1007 shown along with the pool name

1008

1009 **Table S5 – Table of Biosensors.** Sequences of principal sensors isolated. Each  
1010 distinct sequence that was measured against the set of 267 single compounds at 10 $\mu$ M  
1011 and exhibited a fold change of cleavage of at least 2.0 is shown. These were then  
1012 clustered into 150 groups (column 2) using the pattern of compounds to which the  
1013 sequence responded. Columns 3-6 show the number of compounds that result in a fold  
1014 change of cleavage of at least 2.0, 3.0, 5.0, or 8.0 respectively. The identity and fold  
1015 change of the compounds which resulted in at least 2 fold change of cleavage are

1016 shown in column 7, and the sequence is shown in column 8 with spacing delineating the  
1017 loops and stems of the expected secondary structure

1018

1019 **Table S6 – Table Classifier Model Output.** Random forest classification of hits and  
1020 misses. For each biosensor modeled, performance of the classifier is shown, including:  
1021 number of compounds measured, number of compounds with at least 2-fold change of  
1022 cleavage, the number of true negative classifications, the number of false-positives, the  
1023 number of false-negatives, the number of true positives, the precision of the classifier,  
1024 the true positive and negative rates of the classifier, and the area under the curve (AUC)  
1025 of the receiver operating curve (ROC).

1026

1027 **File S1 – All Hits Summary.** Comprehensive listing of each sensor identified, chart  
1028 of fold change in the presence of each compound that affects it, and structures of those  
1029 compounds in same format as Figure 9.

1030

1031

1032

1033

1034

## 1035 **Bibliography**

- 1036
- 1037 1. Roybal KT, Rupp LJ, Morsut L, Walker WJ, McNally KA, Park JS, et al. Precision  
1038 Tumor Recognition by T Cells With Combinatorial Antigen-Sensing Circuits. *Cell*.  
1039 2016;164: 770–779. doi:10.1016/j.cell.2016.01.011
- 1040 2. Liu Y, Liu Y, Wang M. Design, Optimization and Application of Small Molecule  
1041 Biosensor in Metabolic Engineering. *Front Microbiol.* 2017;8: 2012.  
1042 doi:10.3389/fmicb.2017.02012
- 1043 3. Ding N, Zhou S, Deng Y. Transcription-Factor-based Biosensor Engineering for  
1044 Applications in Synthetic Biology. *ACS Synth Biol.* 2021;10: 911–922.  
1045 doi:10.1021/acssynbio.0c00252
- 1046 4. Cormann KU, Baumgart M, Bott M. Structure-Based Design of Versatile Biosensors  
1047 for Small Molecules Based on the PAS Domain of a Thermophilic Histidine Kinase.  
1048 *ACS Synth Biol.* 2018;7: 2888–2897. doi:10.1021/acssynbio.8b00348
- 1049 5. McConnell EM, Nguyen J, Li Y. Aptamer-Based Biosensors for Environmental  
1050 Monitoring. *Front Chem.* 2020;8: 434. doi:10.3389/fchem.2020.00434
- 1051 6. Wang T, Chen C, Larcher LM, Barrero RA, Veedu RN. Three decades of nucleic  
1052 acid aptamer technologies: Lessons learned, progress and opportunities on  
1053 aptamer development. *Biotechnol Adv.* 2019;37: 28–50.  
1054 doi:10.1016/j.biotechadv.2018.11.001
- 1055 7. Rossetti M, Ippodrino R, Marini B, Palleschi G, Porchetta A. Antibody-Mediated  
1056 Small Molecule Detection Using Programmable DNA-Switches. *Anal Chem.*  
1057 2018;90: 8196–8201. doi:10.1021/acs.analchem.8b01584
- 1058 8. Tuerk C, Gold L. Systematic evolution of ligands by exponential enrichment: RNA  
1059 ligands to bacteriophage T4 DNA polymerase. *Science.* 1990;249: 505–510.  
1060 doi:10.1126/science.2200121

- 1061 9. Ellington AD, Szostak JW. In vitro selection of RNA molecules that bind specific  
1062 ligands. *Nature*. 1990;346: 818–822. doi:10.1038/346818a0
- 1063 10. Robertson DL, Joyce GF. Selection in vitro of an RNA enzyme that specifically  
1064 cleaves single-stranded DNA. *Nature*. 1990;344: 467–468. doi:10.1038/344467a0
- 1065 11. Darmostuk M, Rimpelova S, Gbelcova H, Ruml T. Current approaches in SELEX:  
1066 An update to aptamer selection technology. *Biotechnol Adv*. 2015;33: 1141–1161.  
1067 doi:10.1016/j.biotechadv.2015.02.008
- 1068 12. Ozer A, Pagano JM, Lis JT. New Technologies Provide Quantum Changes in the  
1069 Scale, Speed, and Success of SELEX Methods and Aptamer Characterization. *Mol*  
1070 *Ther Nucleic Acids*. 2014;3: e183. doi:10.1038/mtna.2014.34
- 1071 13. Dunn MR, Jimenez RM, Chaput JC. Analysis of aptamer discovery and technology.  
1072 *Nat Rev Chem*. 2017;1: 0076. doi:10.1038/s41570-017-0076
- 1073 14. Komarova N, Kuznetsov A. Inside the Black Box: What Makes SELEX Better?  
1074 *Molecules*. 2019;24: 3598. doi:10.3390/molecules24193598
- 1075 15. McKeague M, Derosa MC. Challenges and opportunities for small molecule  
1076 aptamer development. *J Nucleic Acids*. 2012;2012. doi:10.1155/2012/748913
- 1077 16. Baird GS. Where Are All the Aptamers? *Am J Clin Pathol*. 2010;134: 529–531.  
1078 doi:10.1309/AJCPFU4CG2WGJJKS
- 1079 17. Townshend B, Xiang JS, Manzanarez G, Hayden EJ, Smolke CD. A multiplexed,  
1080 automated evolution pipeline enables scalable discovery and characterization of  
1081 biosensors. *Nat Commun*. 2021;12: 1437. doi:10.1038/s41467-021-21716-0
- 1082 18. Xiang JS, Kaplan M, Dykstra P, Hinks M, McKeague M, Smolke CD. Massively  
1083 parallel RNA device engineering in mammalian cells with RNA-Seq. *Nat Commun*.  
1084 2019;10: 4327. doi:10.1038/s41467-019-12334-y

- 1085 19. Townshend, Brent. CleaveSeq: Scalable characterization of ribozyme-based RNA  
1086 biosensors. *Protoc Exch.* 2021. doi:10.21203/rs.3.pex-1346/v1
- 1087 20. Nelson JA, Shepotinovskaya I, Uhlenbeck OC. Hammerheads Derived from sTRSV  
1088 Show Enhanced Cleavage and Ligation Rate Constants <sup>†</sup>. *Biochemistry.* 2005;44:  
1089 14577–14585. doi:10.1021/bi051130t
- 1090 21. Townshend B, Kennedy AB, Xiang JS, Smolke CD. High-throughput cellular RNA  
1091 device engineering. *Nat Methods.* 2015;12: 989–994.
- 1092 22. Stanford Medicine. High-Throughput Bioscience Center (HTBC). Available:  
1093 <http://med.stanford.edu/htbc.html>
- 1094 23. Lorenz R, Bernhart SH, Höner zu Siederdissen C, Tafer H, Flamm C, Stadler PF,  
1095 et al. ViennaRNA Package 2.0. *Algorithms Mol Biol.* 2011;6: 26. doi:10.1186/1748-  
1096 7188-6-26
- 1097 24. Zimmermann GR, Shields TP, Jenison RD, Wick CL, Pardi A. A Semiconserved  
1098 Residue Inhibits Complex Formation by Stabilizing Interactions in the Free State of  
1099 a Theophylline-Binding RNA. *Biochemistry.* 1998;37: 9186–9192.  
1100 doi:10.1021/bi980082s
- 1101 25. Duchardt-Ferner E, Gottstein-Schmidtke SR, Weigand JE, Ohlenschläger O, Wurm  
1102 J-P, Hammann C, et al. What a Difference an OH Makes: Conformational  
1103 Dynamics as the Basis for the Ligand Specificity of the Neomycin-Sensing  
1104 Riboswitch. *Angew Chem Int Ed Engl.* 2016;55: 1527–1530.  
1105 doi:10.1002/anie.201507365
- 1106 26. Xiao H, Edwards TE, Ferré-D'Amaré AR. Structural basis for specific, high-affinity  
1107 tetracycline binding by an in vitro evolved aptamer and artificial riboswitch. *Chem*  
1108 *Biol.* 2008;15: 1125–1137. doi:10.1016/j.chembiol.2008.09.004
- 1109 27. McKeague M, Wang Y-H, Cravens A, Win MN, Smolke CD. Engineering a  
1110 microbial platform for de novo biosynthesis of diverse methylxanthines. *Metab Eng.*  
1111 2016;38: 191–203. doi:10.1016/j.ymben.2016.08.003

- 1112 28. Gardner JW, Bartlett PN. A brief history of electronic noses. *Sens Actuators B*  
1113 *Chem.* 1994;18: 210–211. doi:10.1016/0925-4005(94)87085-3
- 1114 29. Farraia MV, Cavaleiro Rufo J, Paciência I, Mendes F, Delgado L, Moreira A. The  
1115 electronic nose technology in clinical diagnosis: A systematic review. *Porto Biomed*  
1116 *J.* 2019;4: e42. doi:10.1097/j.pbj.0000000000000042
- 1117 30. Townshend RJL, Eismann S, Watkins AM, Rangan R, Karelina M, Das R, et al.  
1118 Geometric deep learning of RNA structure. *Science.* 2021;373: 1047–1051.  
1119 doi:10.1126/science.abe5650
- 1120 31. Zhang J, Kobert K, Flouri T, Stamatakis A. PEAR: a fast and accurate Illumina  
1121 Paired-End reAd mergeR. *Bioinforma Oxf Engl.* 2014;30: 614–20.  
1122 doi:10.1093/bioinformatics/btt593
- 1123  
1124



# Figure 1

a

## 1) DNA Templates

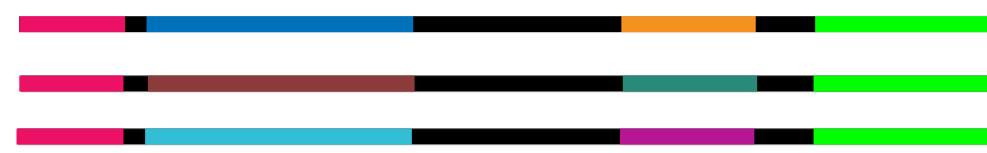

## 2) RNA Transcription and Self-Cleavage

bioRxiv preprint doi: <https://doi.org/10.1101/2022.07.16.500284>; this version posted July 16, 2022. The copyright holder for this preprint (which was not certified by peer review) is the author/funder, who has granted bioRxiv a license to display the preprint in perpetuity. It is made available under aCC-BY-NC-ND 4.0 International license.

Tertiary Contacts

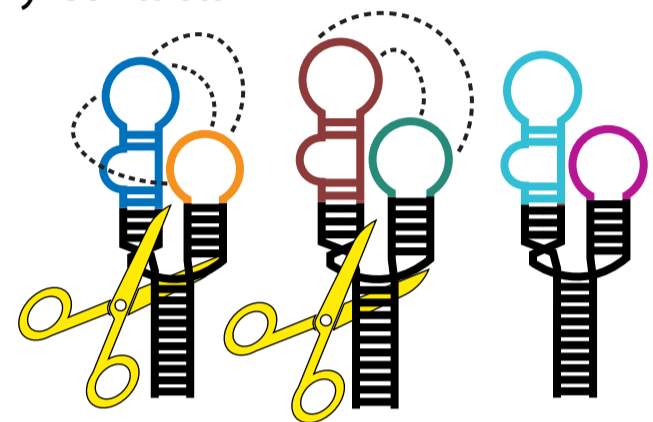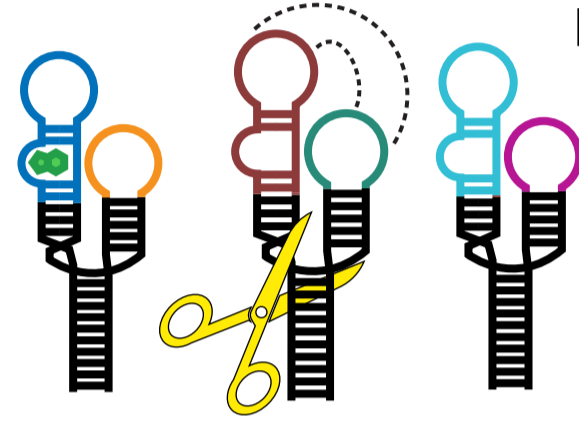

Ligands

Post-Reaction RNA

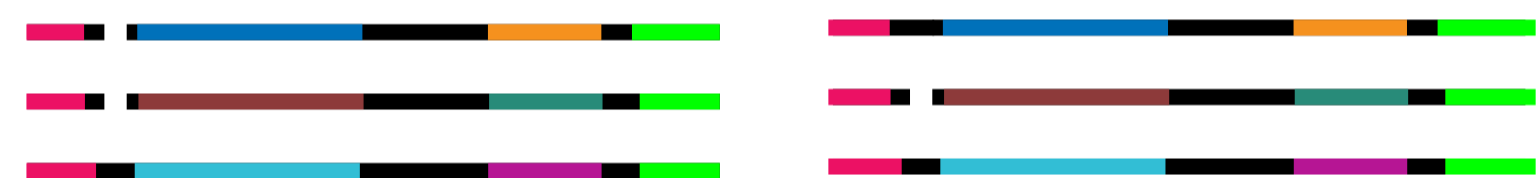

## 3) Reverse Transcription/Ligation

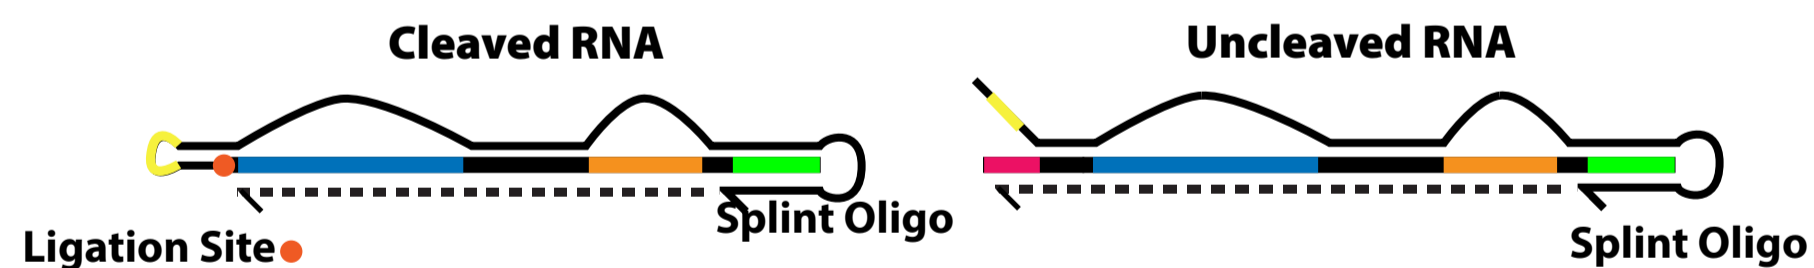

## 4) Selective PCR

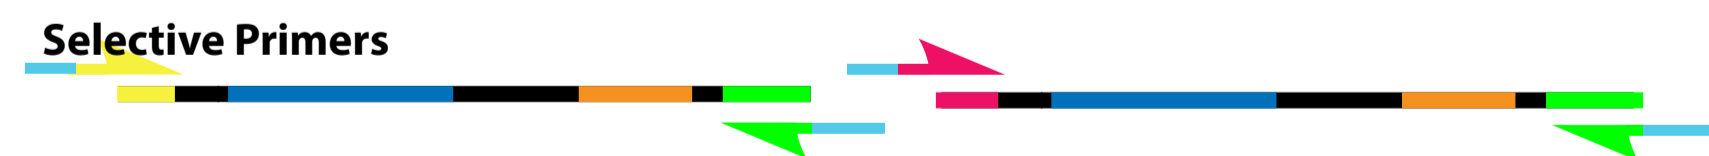

Regenerate Library

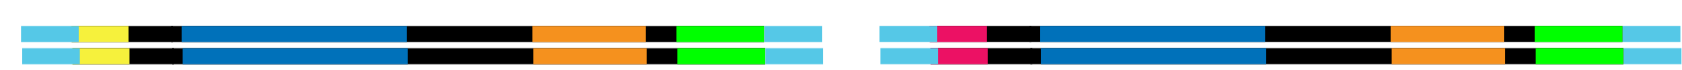

Next DRIVER Cycle

Z-Prefix W-Prefix X-Suffix DNA

b

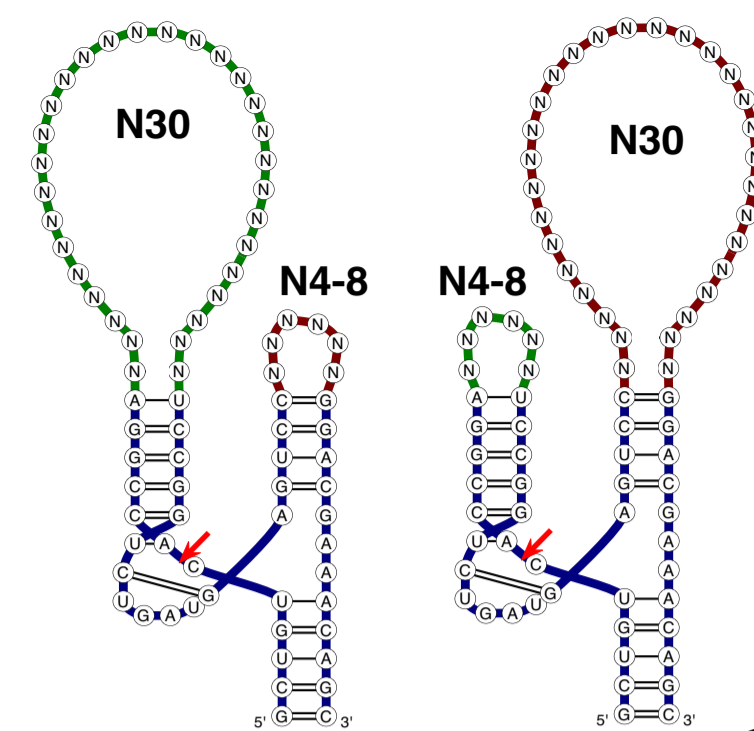

c

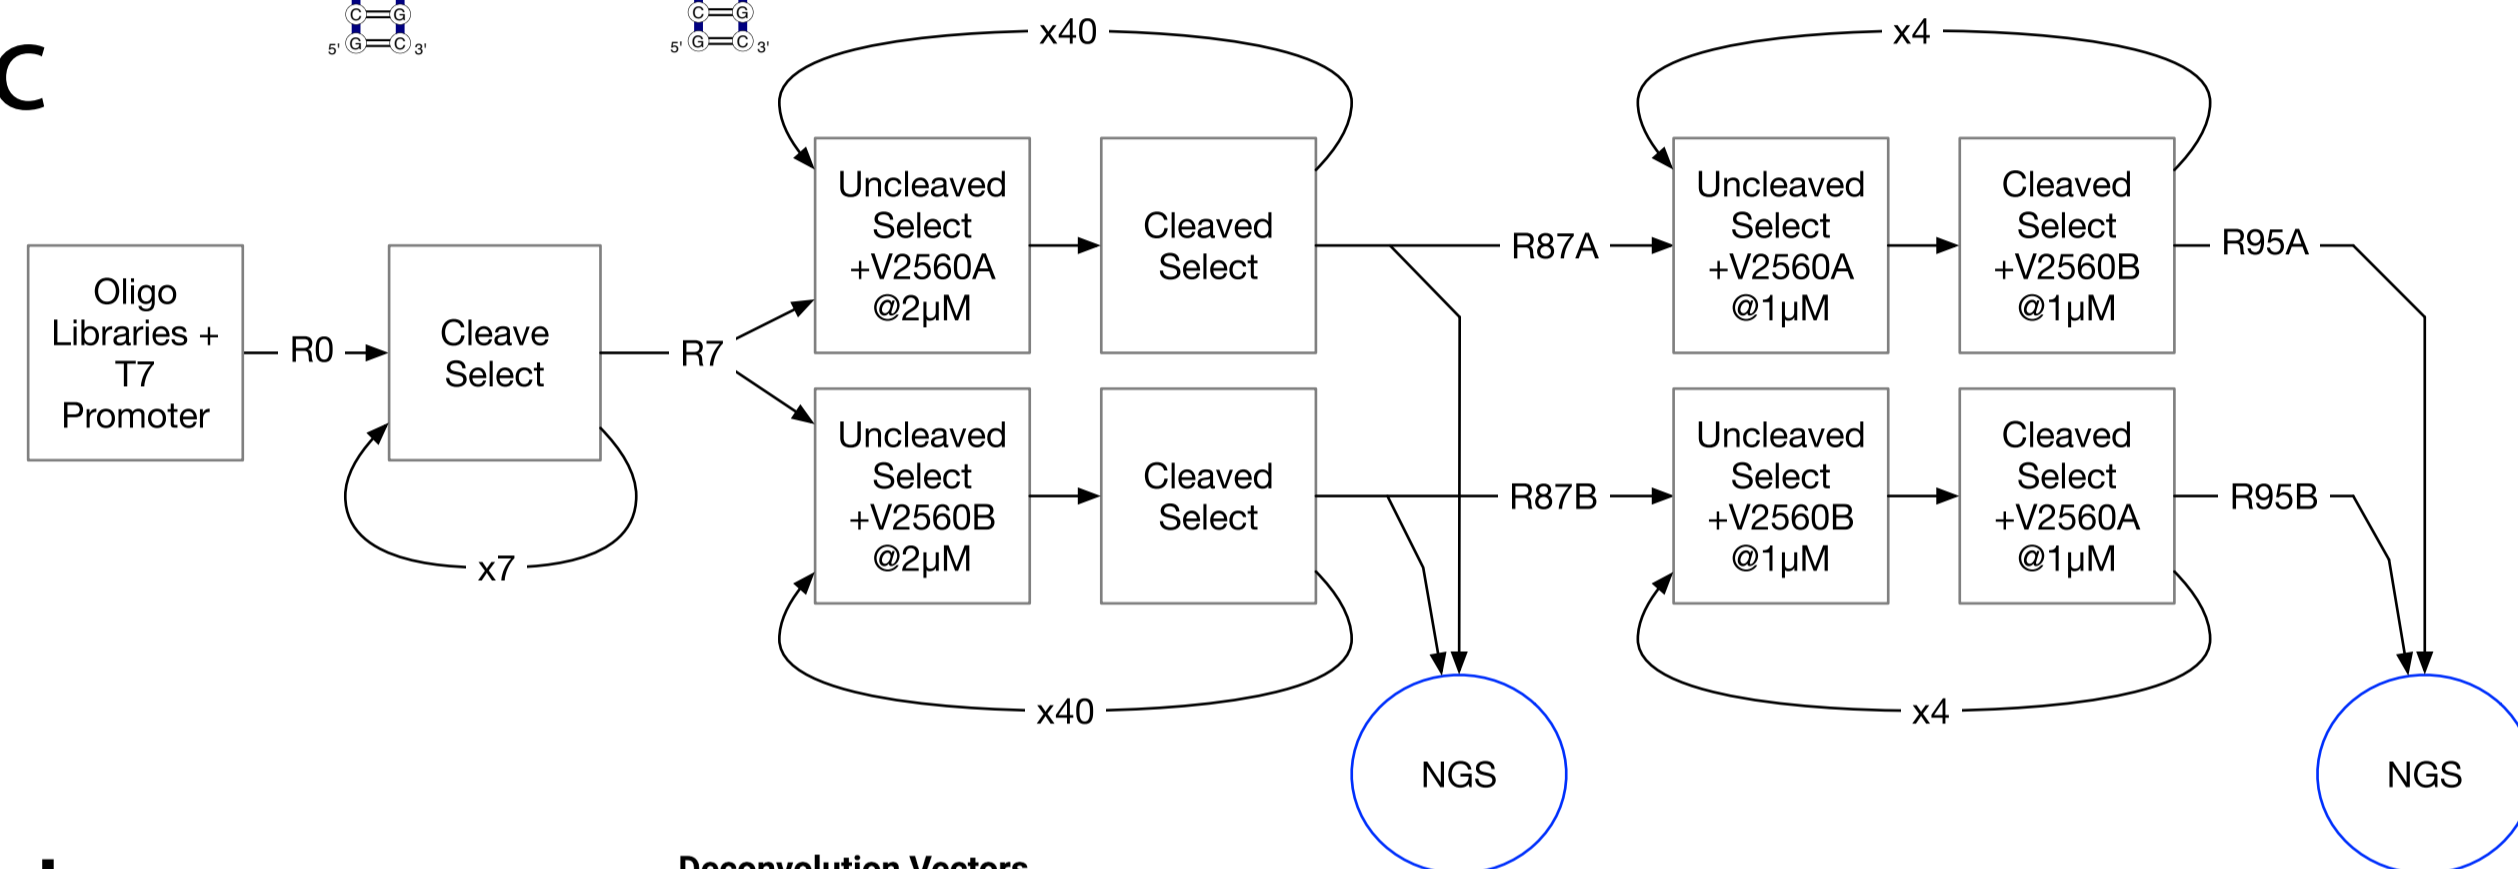

d

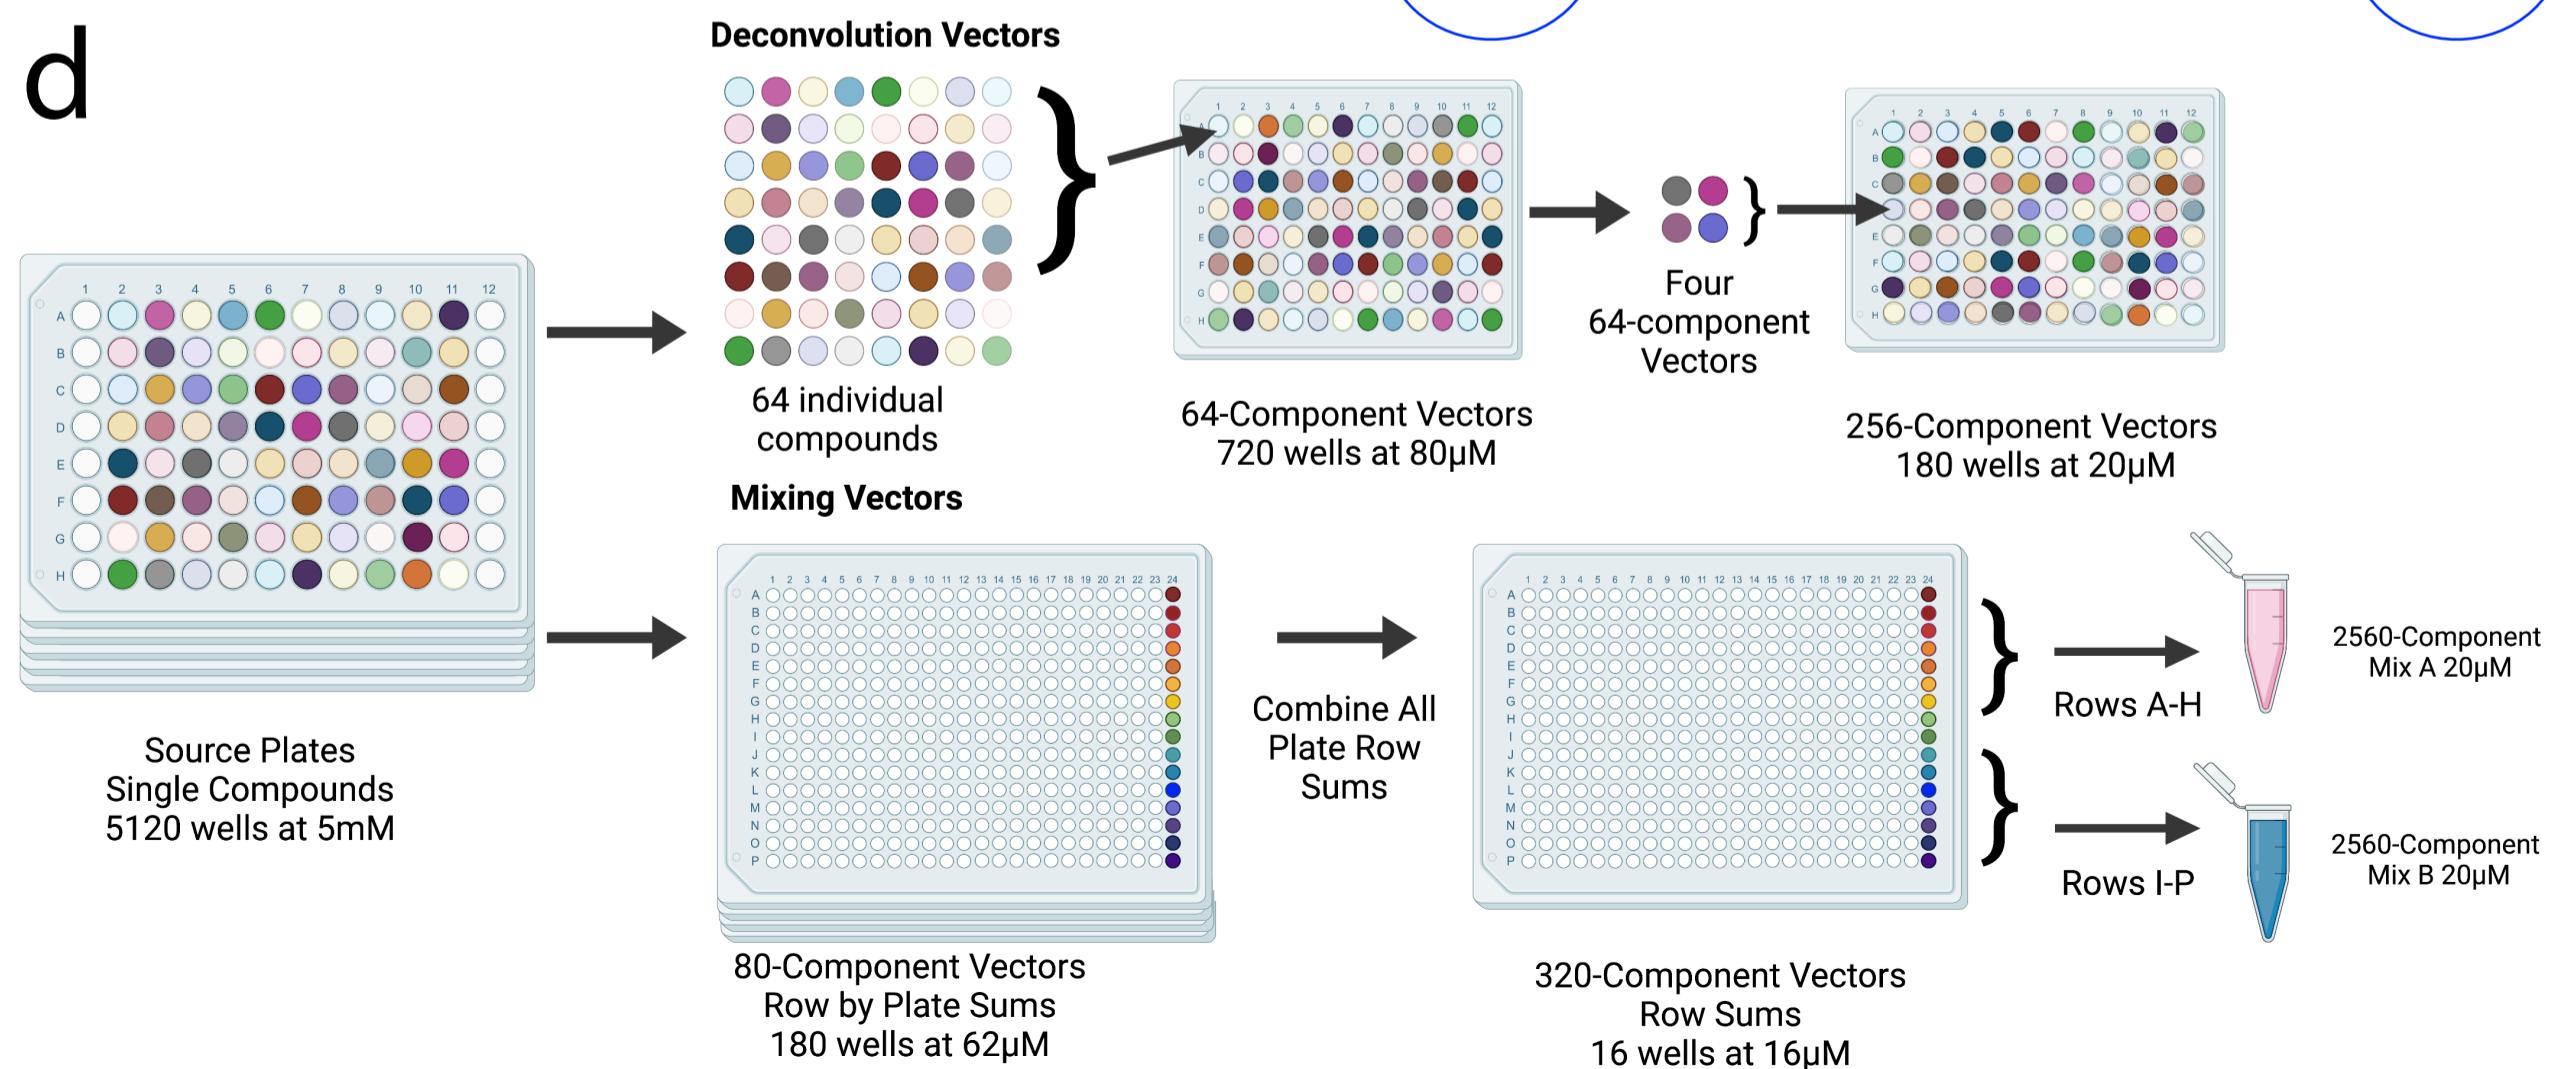

# Figure 2

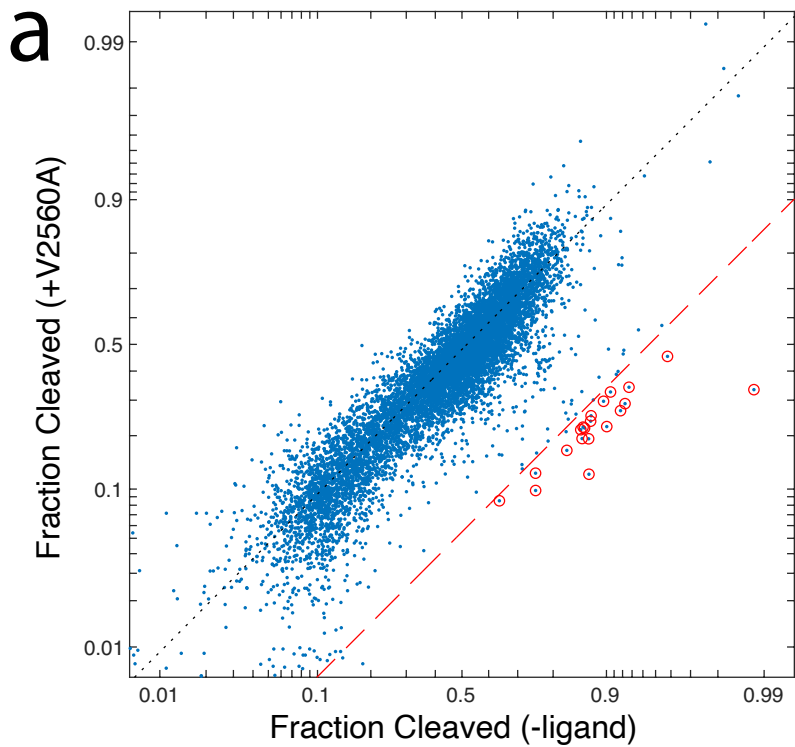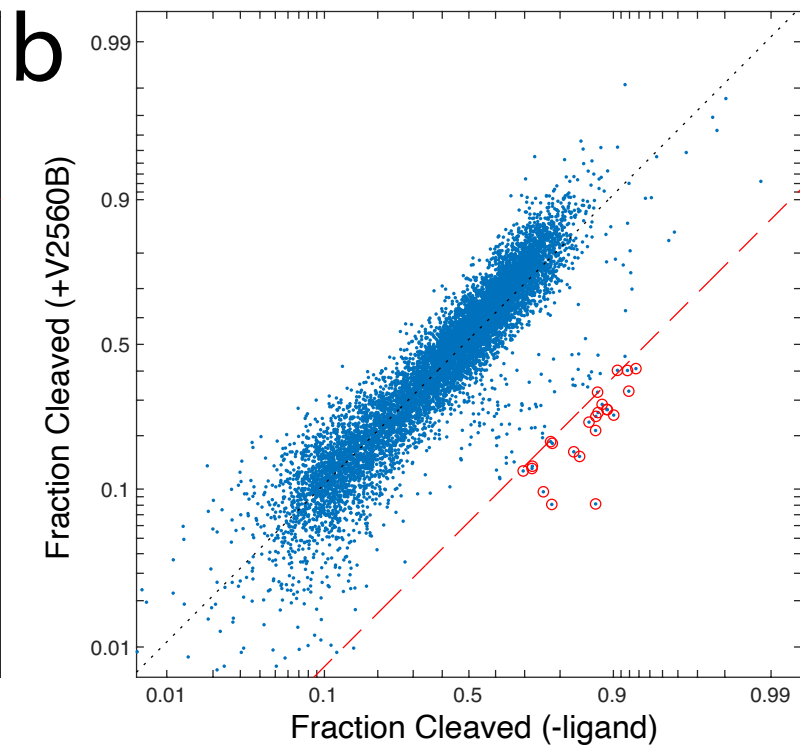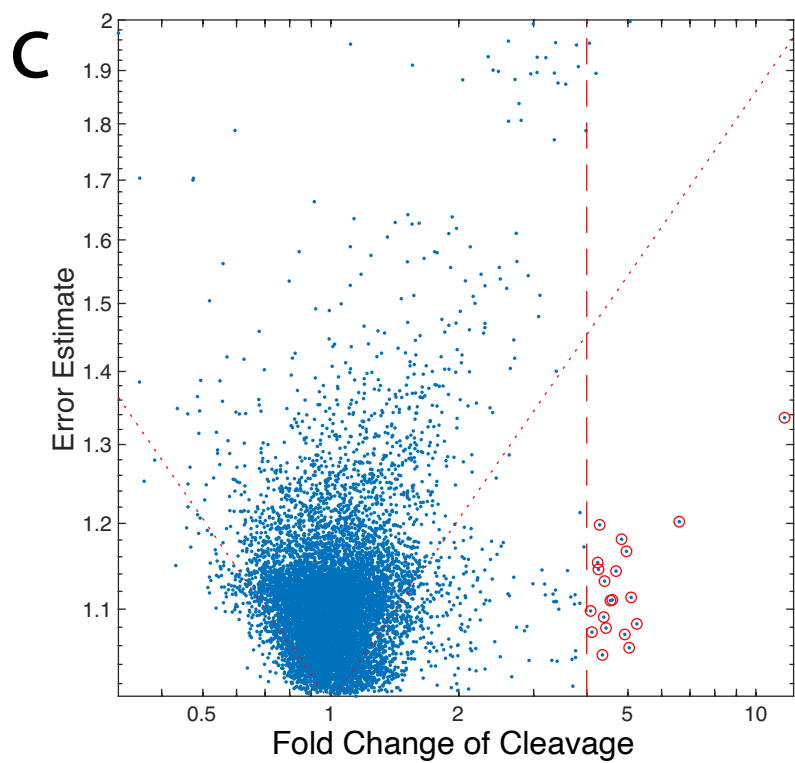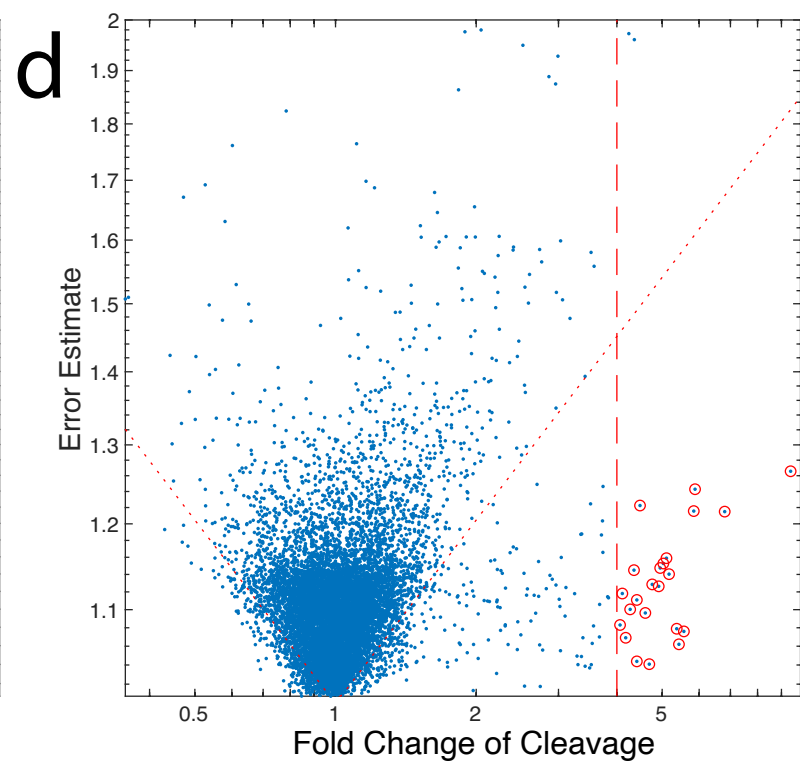

# Figure 3

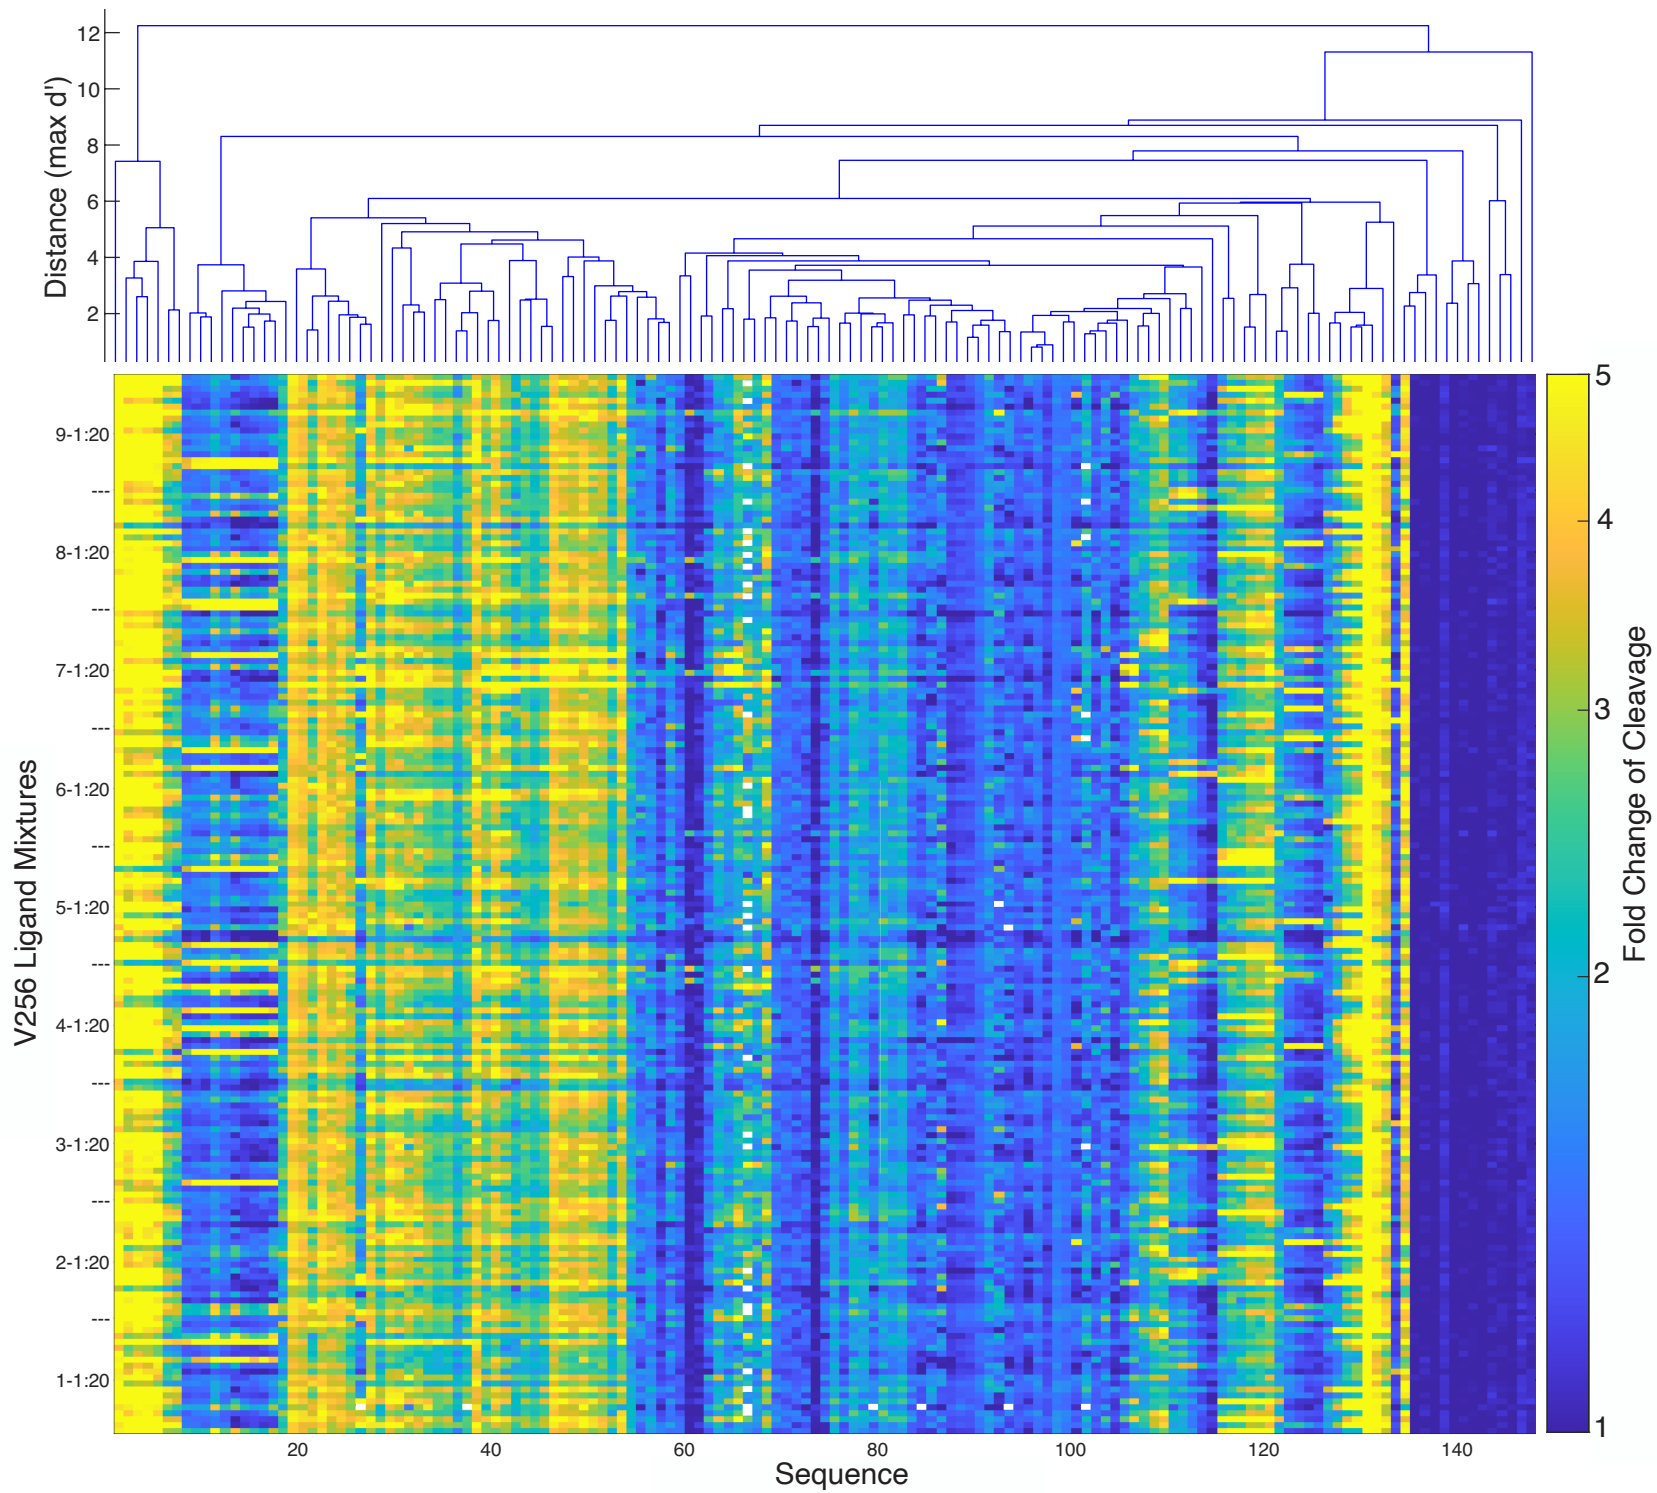

# Figure 4

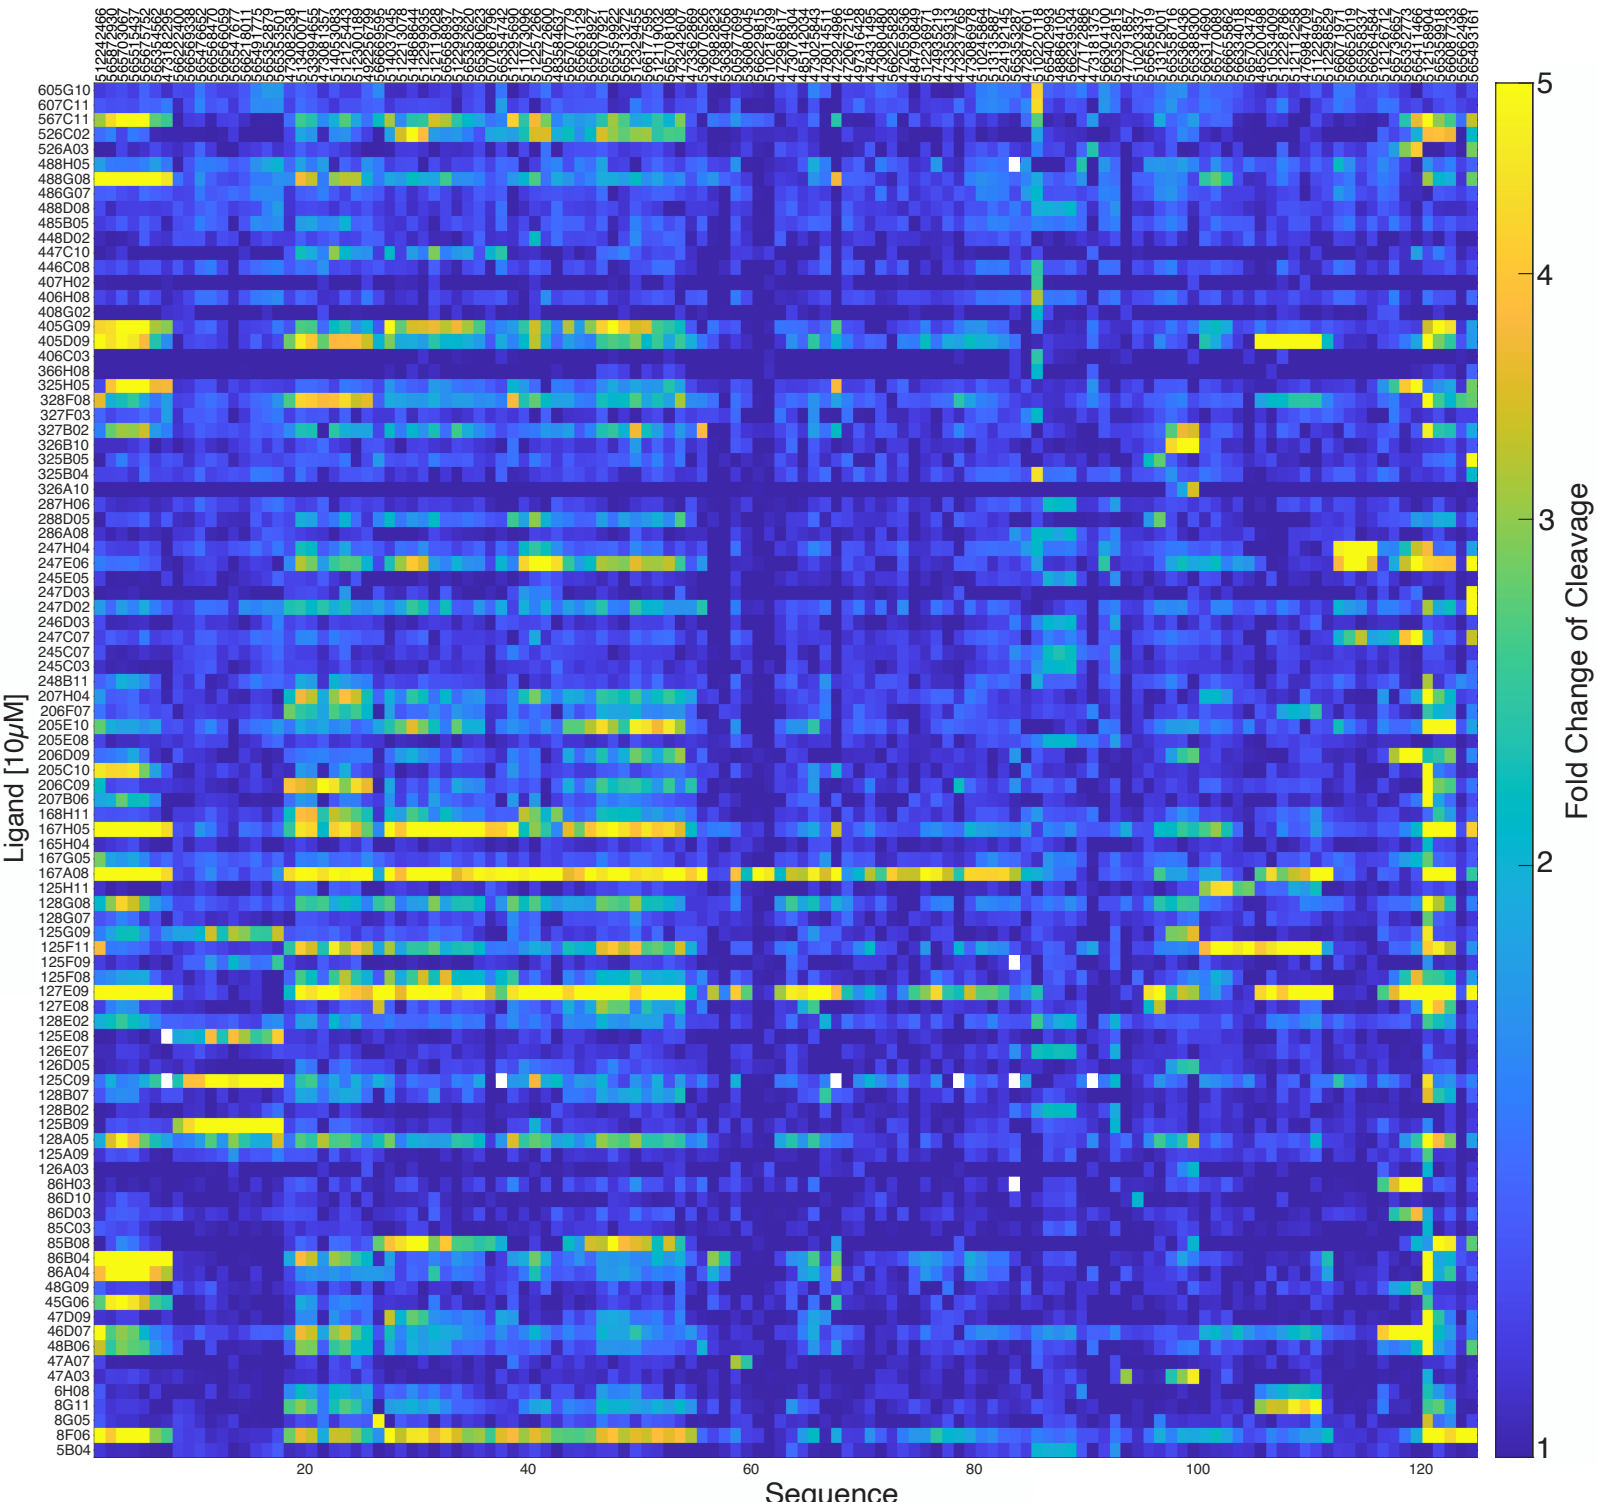

# Figure 5

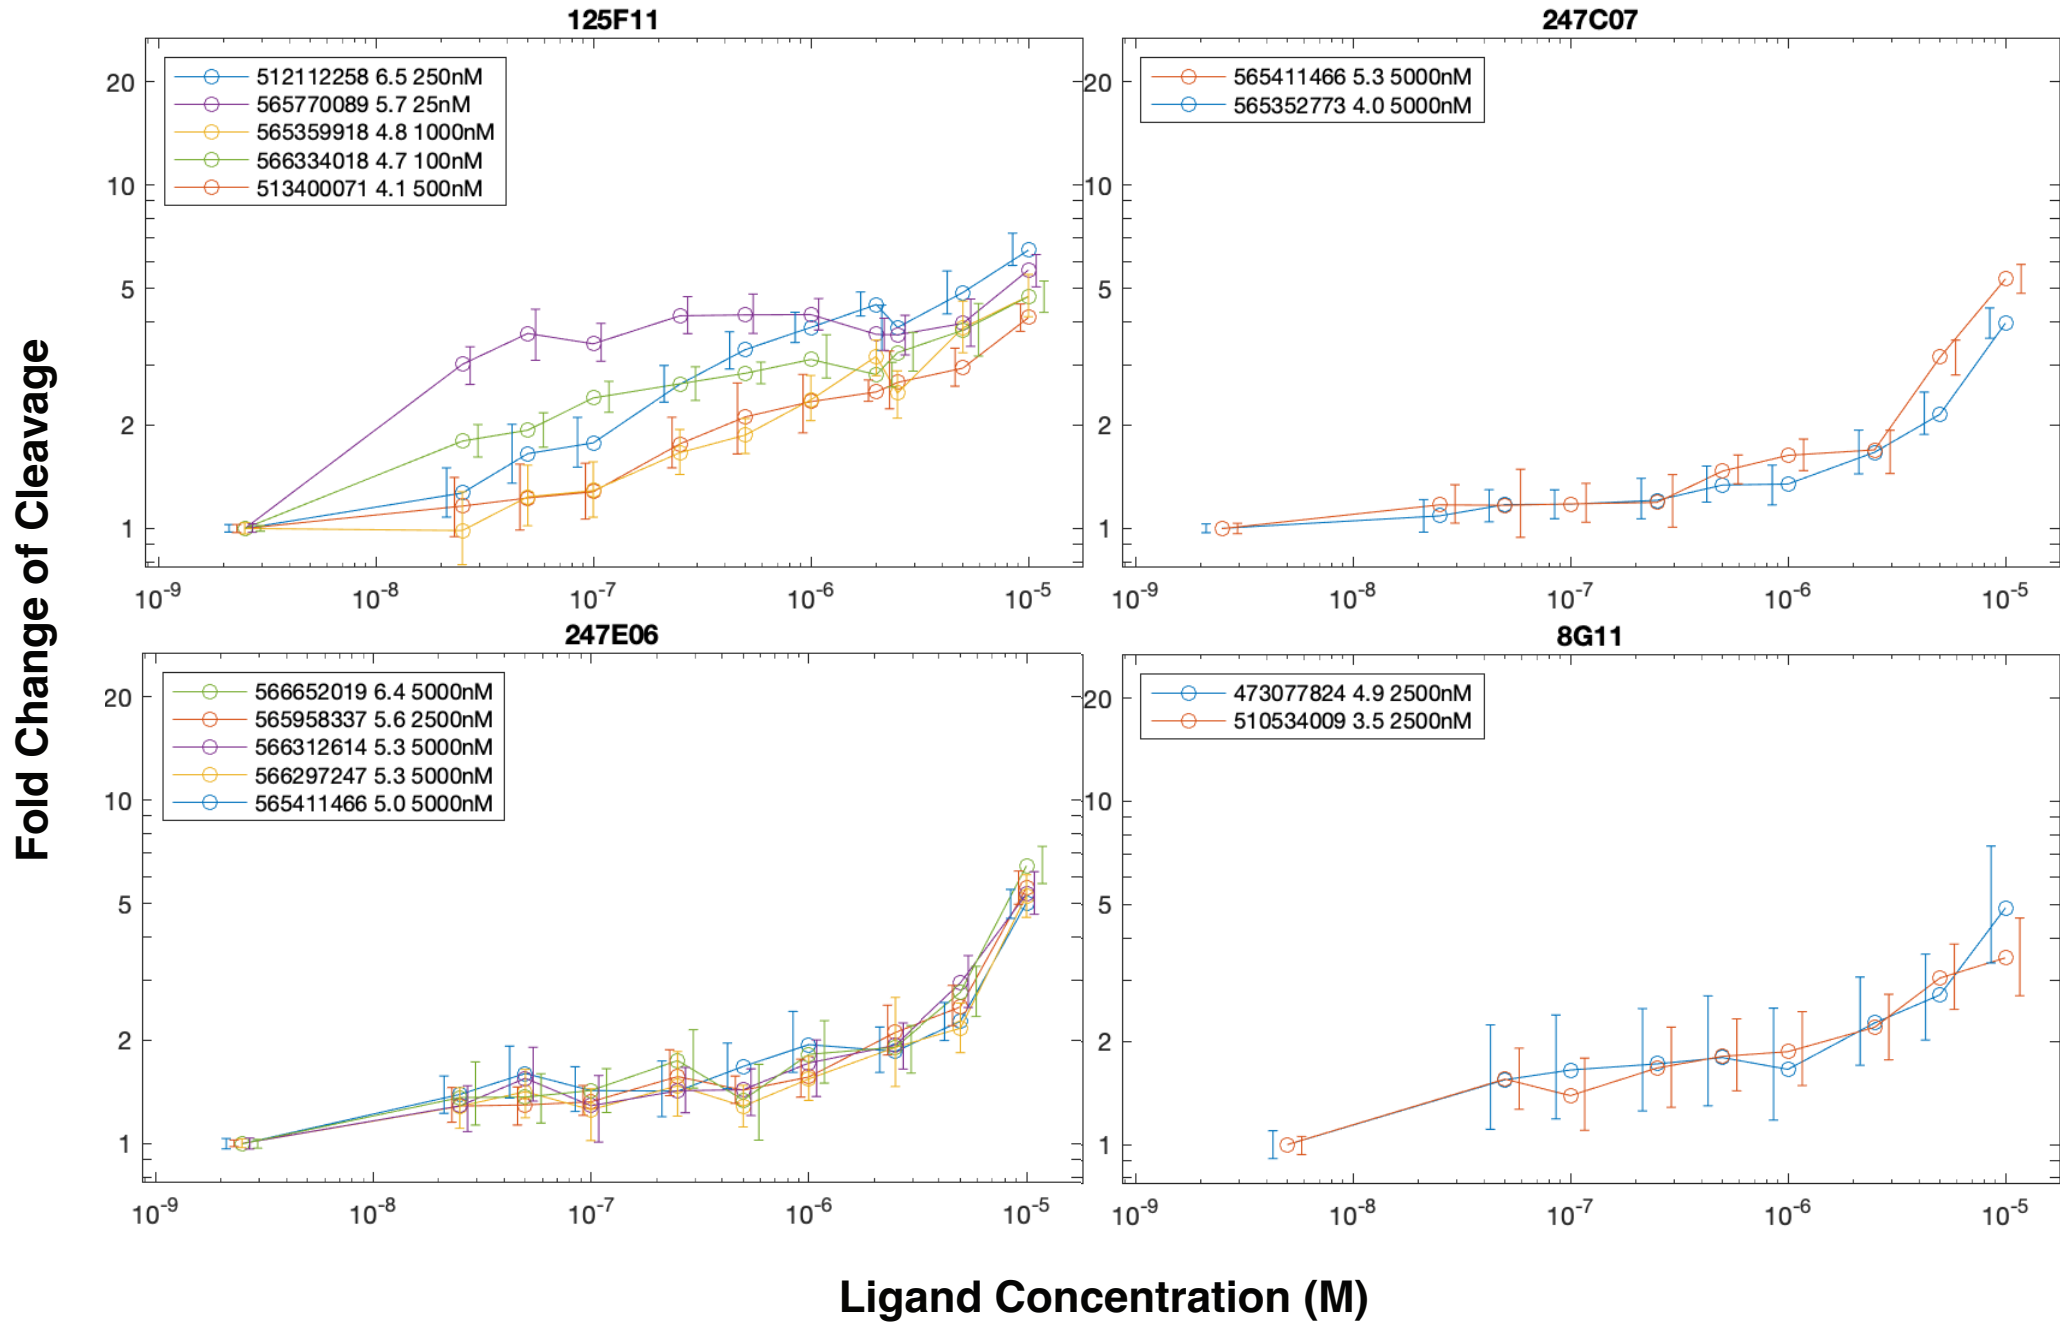

# Figure 6

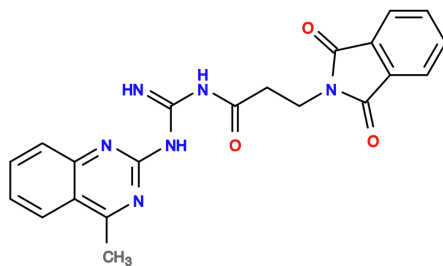

**Compound 125F11**

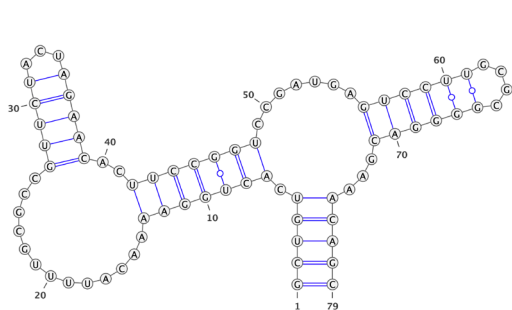

**565703478 – 8.18**

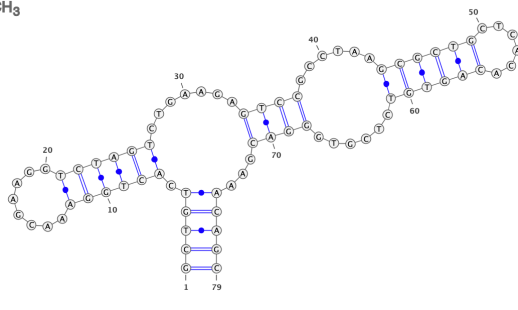

**512112258 – 6.47**

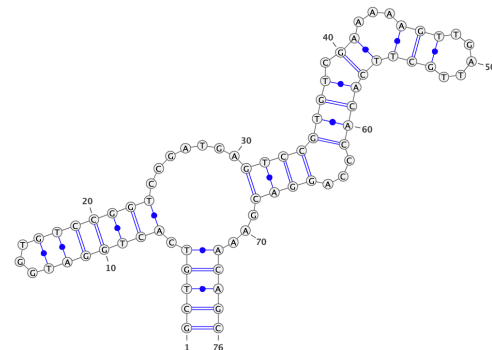

**565770089 – 5.64**

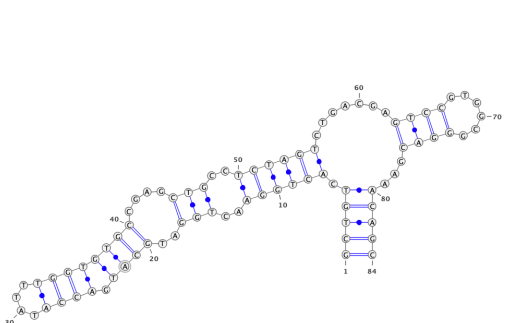

**565359918 - 4.71**

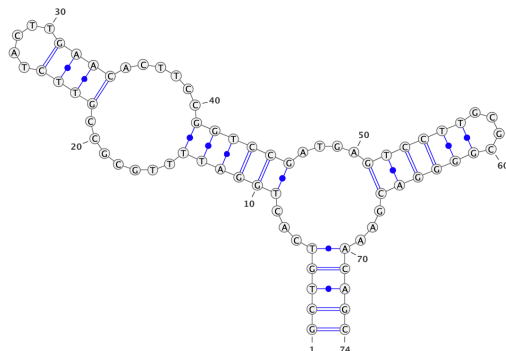

**566334018 - 4.60**

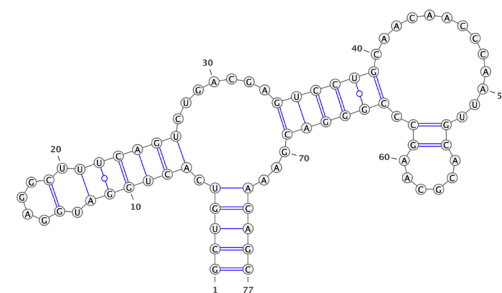

**513400071 - 4.10**

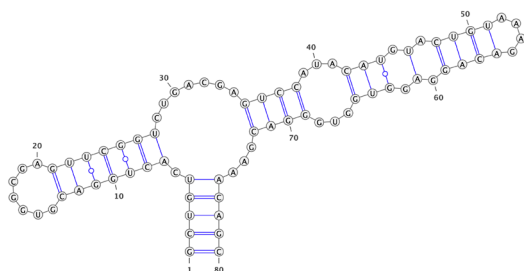

**565662496 – 1.09**

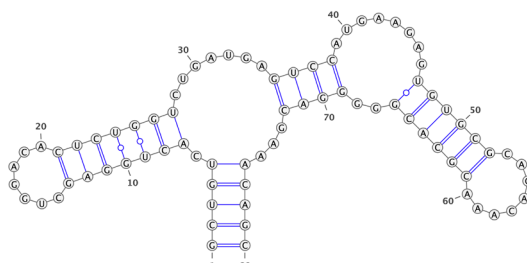

**566566059 – 1.17**

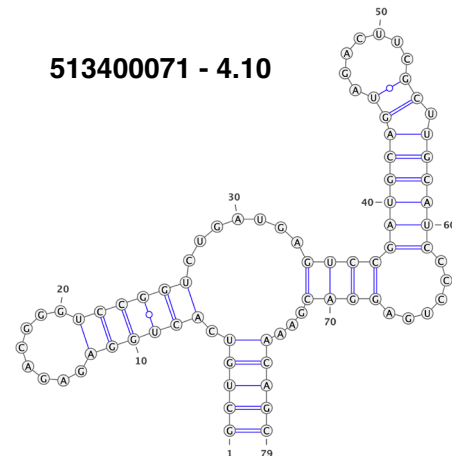

**566566059 – 0.88**

# Figure 7

a

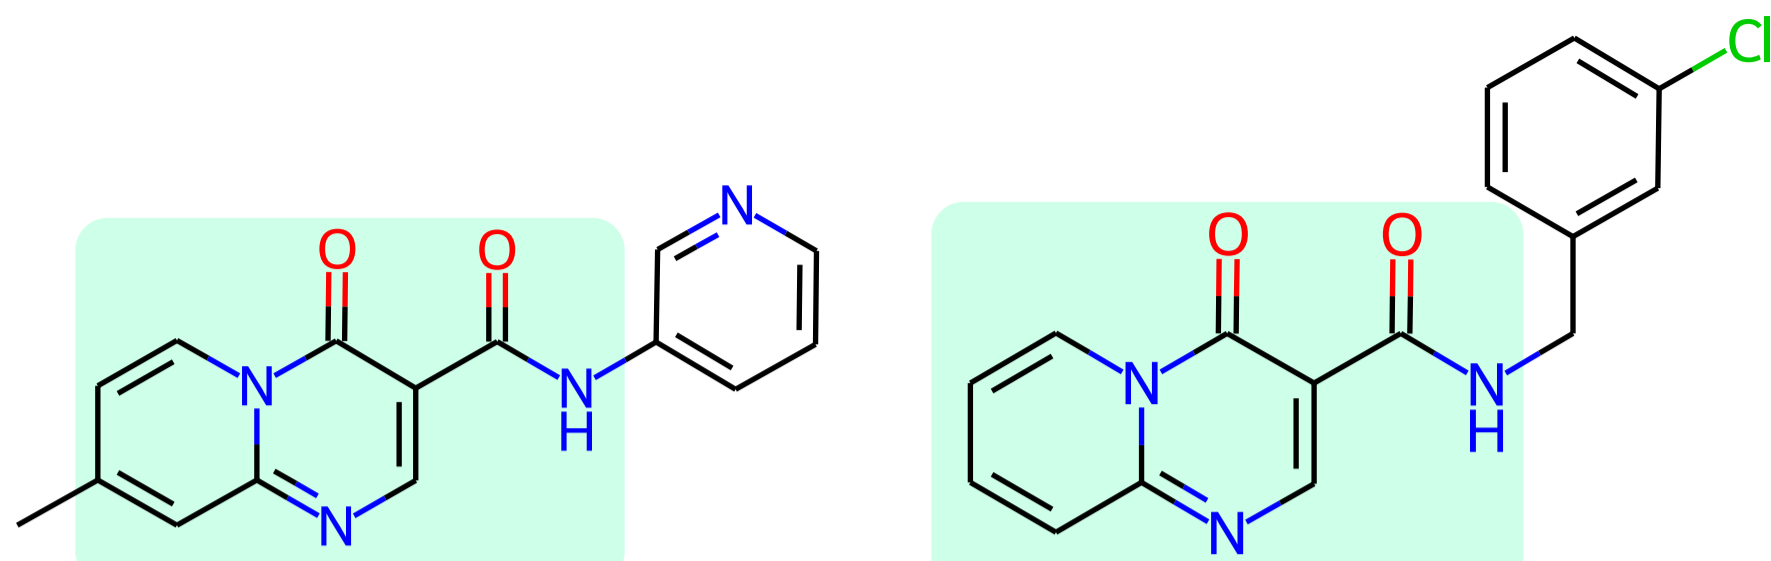

bioRxiv preprint doi: <https://doi.org/10.1101/2022.07.16.500284>; this version posted July 16, 2022. The copyright holder for this preprint (which was not certified by peer review) is the author/funder, who has granted bioRxiv a license to display the preprint in perpetuity. It is made available under aCC-BY 4.0 International license.

Fold Change of Cleavage

| Sequence ID | 325H05 | 325B05 |
|-------------|--------|--------|
| 565675752   | 10.7   | 1.4    |
| 565703067   | 7.6    | 1.5    |
| 565411466   | 6.3    | 1.1    |
| 565493161   | 2.8    | 5.1    |
| 513125001   | 1.3    | 2.8    |

b

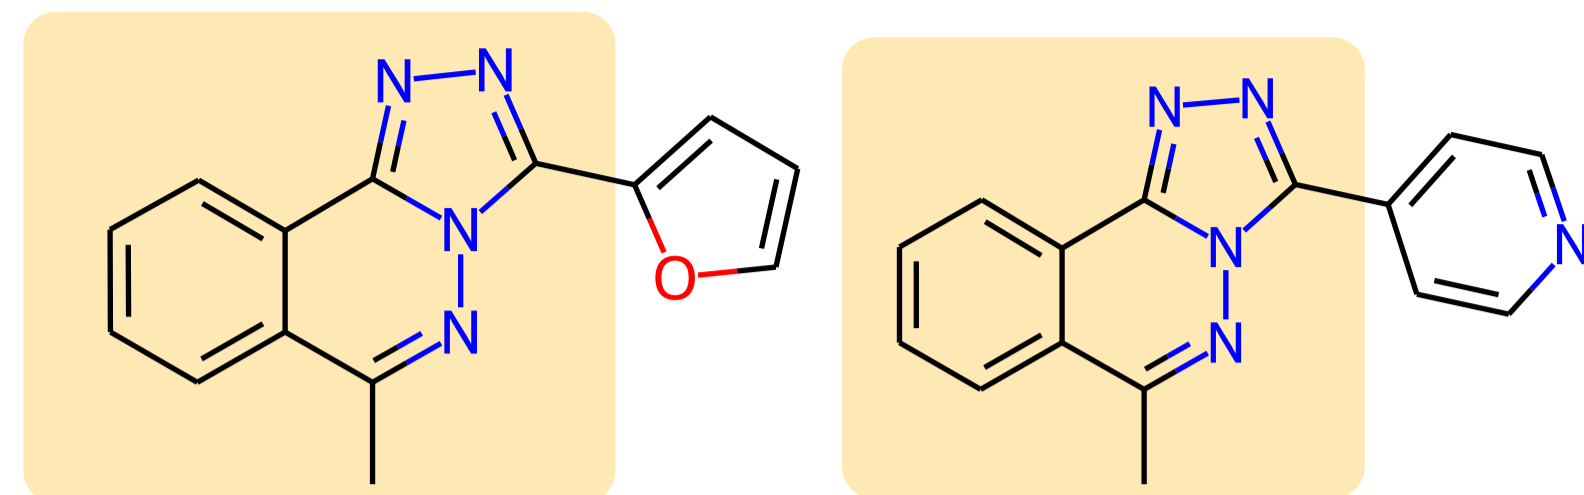

Fold Change of Cleavage

| Sequence ID | 405D09 | 405G09 |
|-------------|--------|--------|
| 512242466   | 8.7    | 4.3    |
| 511228957   | 7.4    | 1.2    |
| 512112258   | 6.6    | 1.4    |
| 565359918   | 2.9    | 7.0    |
| 565359922   | 2.7    | 6.1    |
| 514037045   | 2.9    | 5.8    |

c

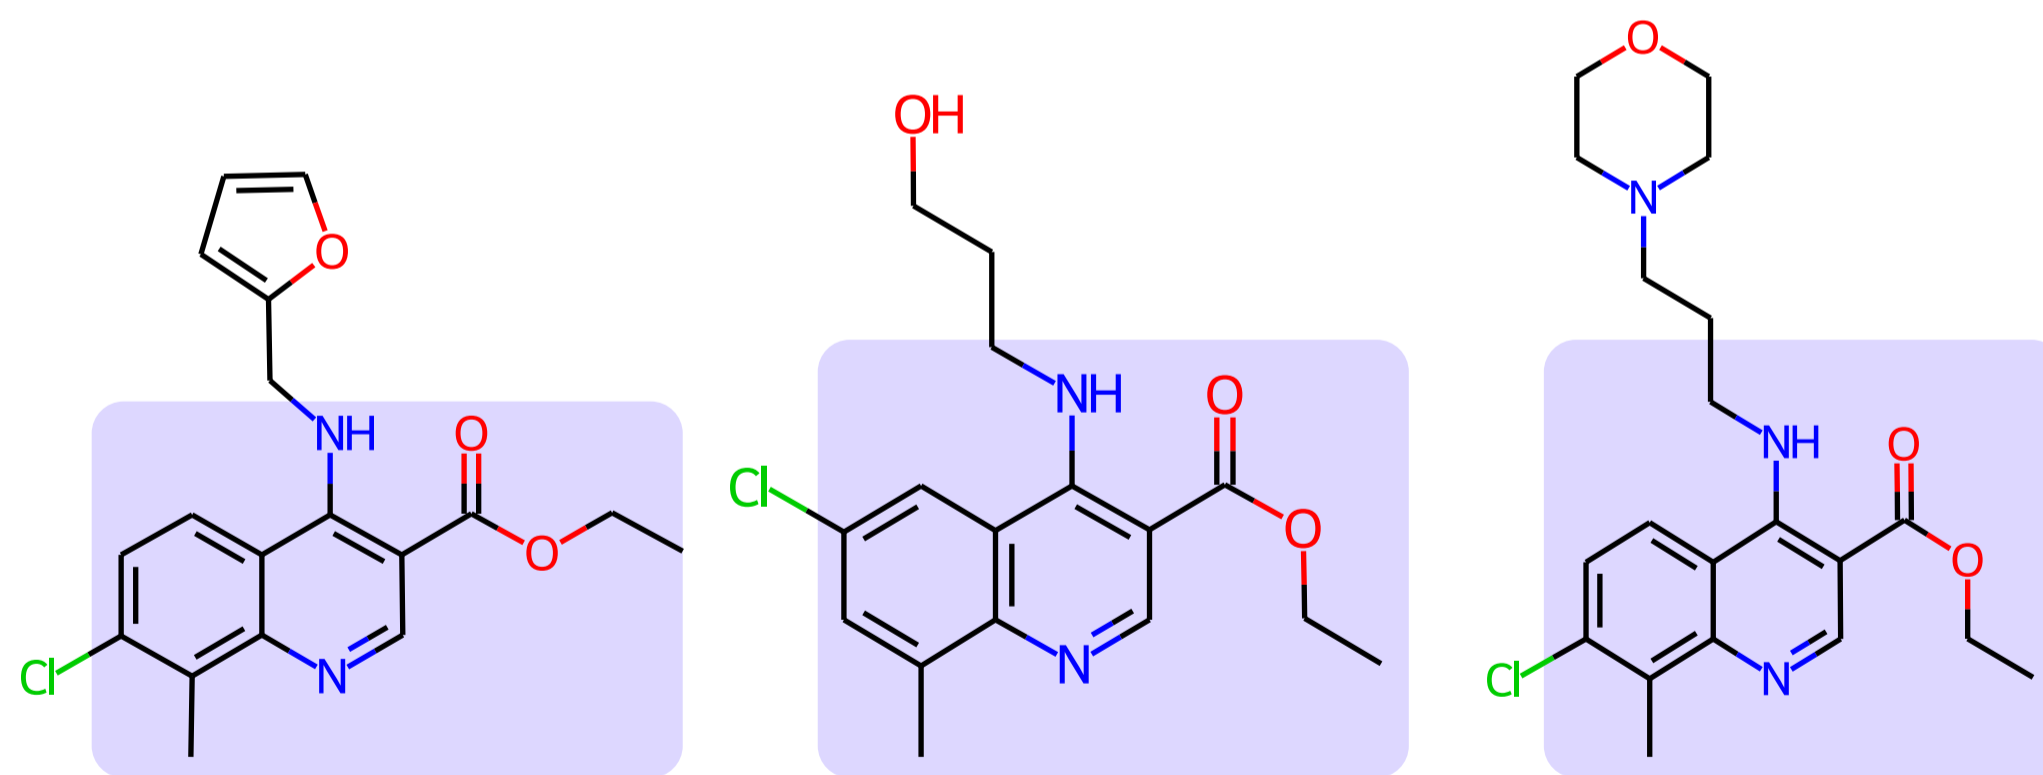

Fold Change of Cleavage

| Sequence ID | 45G06 | 86A04 | 86B04 |
|-------------|-------|-------|-------|
| 565872930   | 4.7   | 7.5   | 11.0  |
| 565703067   | 5.3   | 7.6   | 10.3  |
| 565515437   | 4.5   | 6.3   | 7.9   |
| 512158904   | 2.5   | 6.3   | 6.9   |

# Figure 8

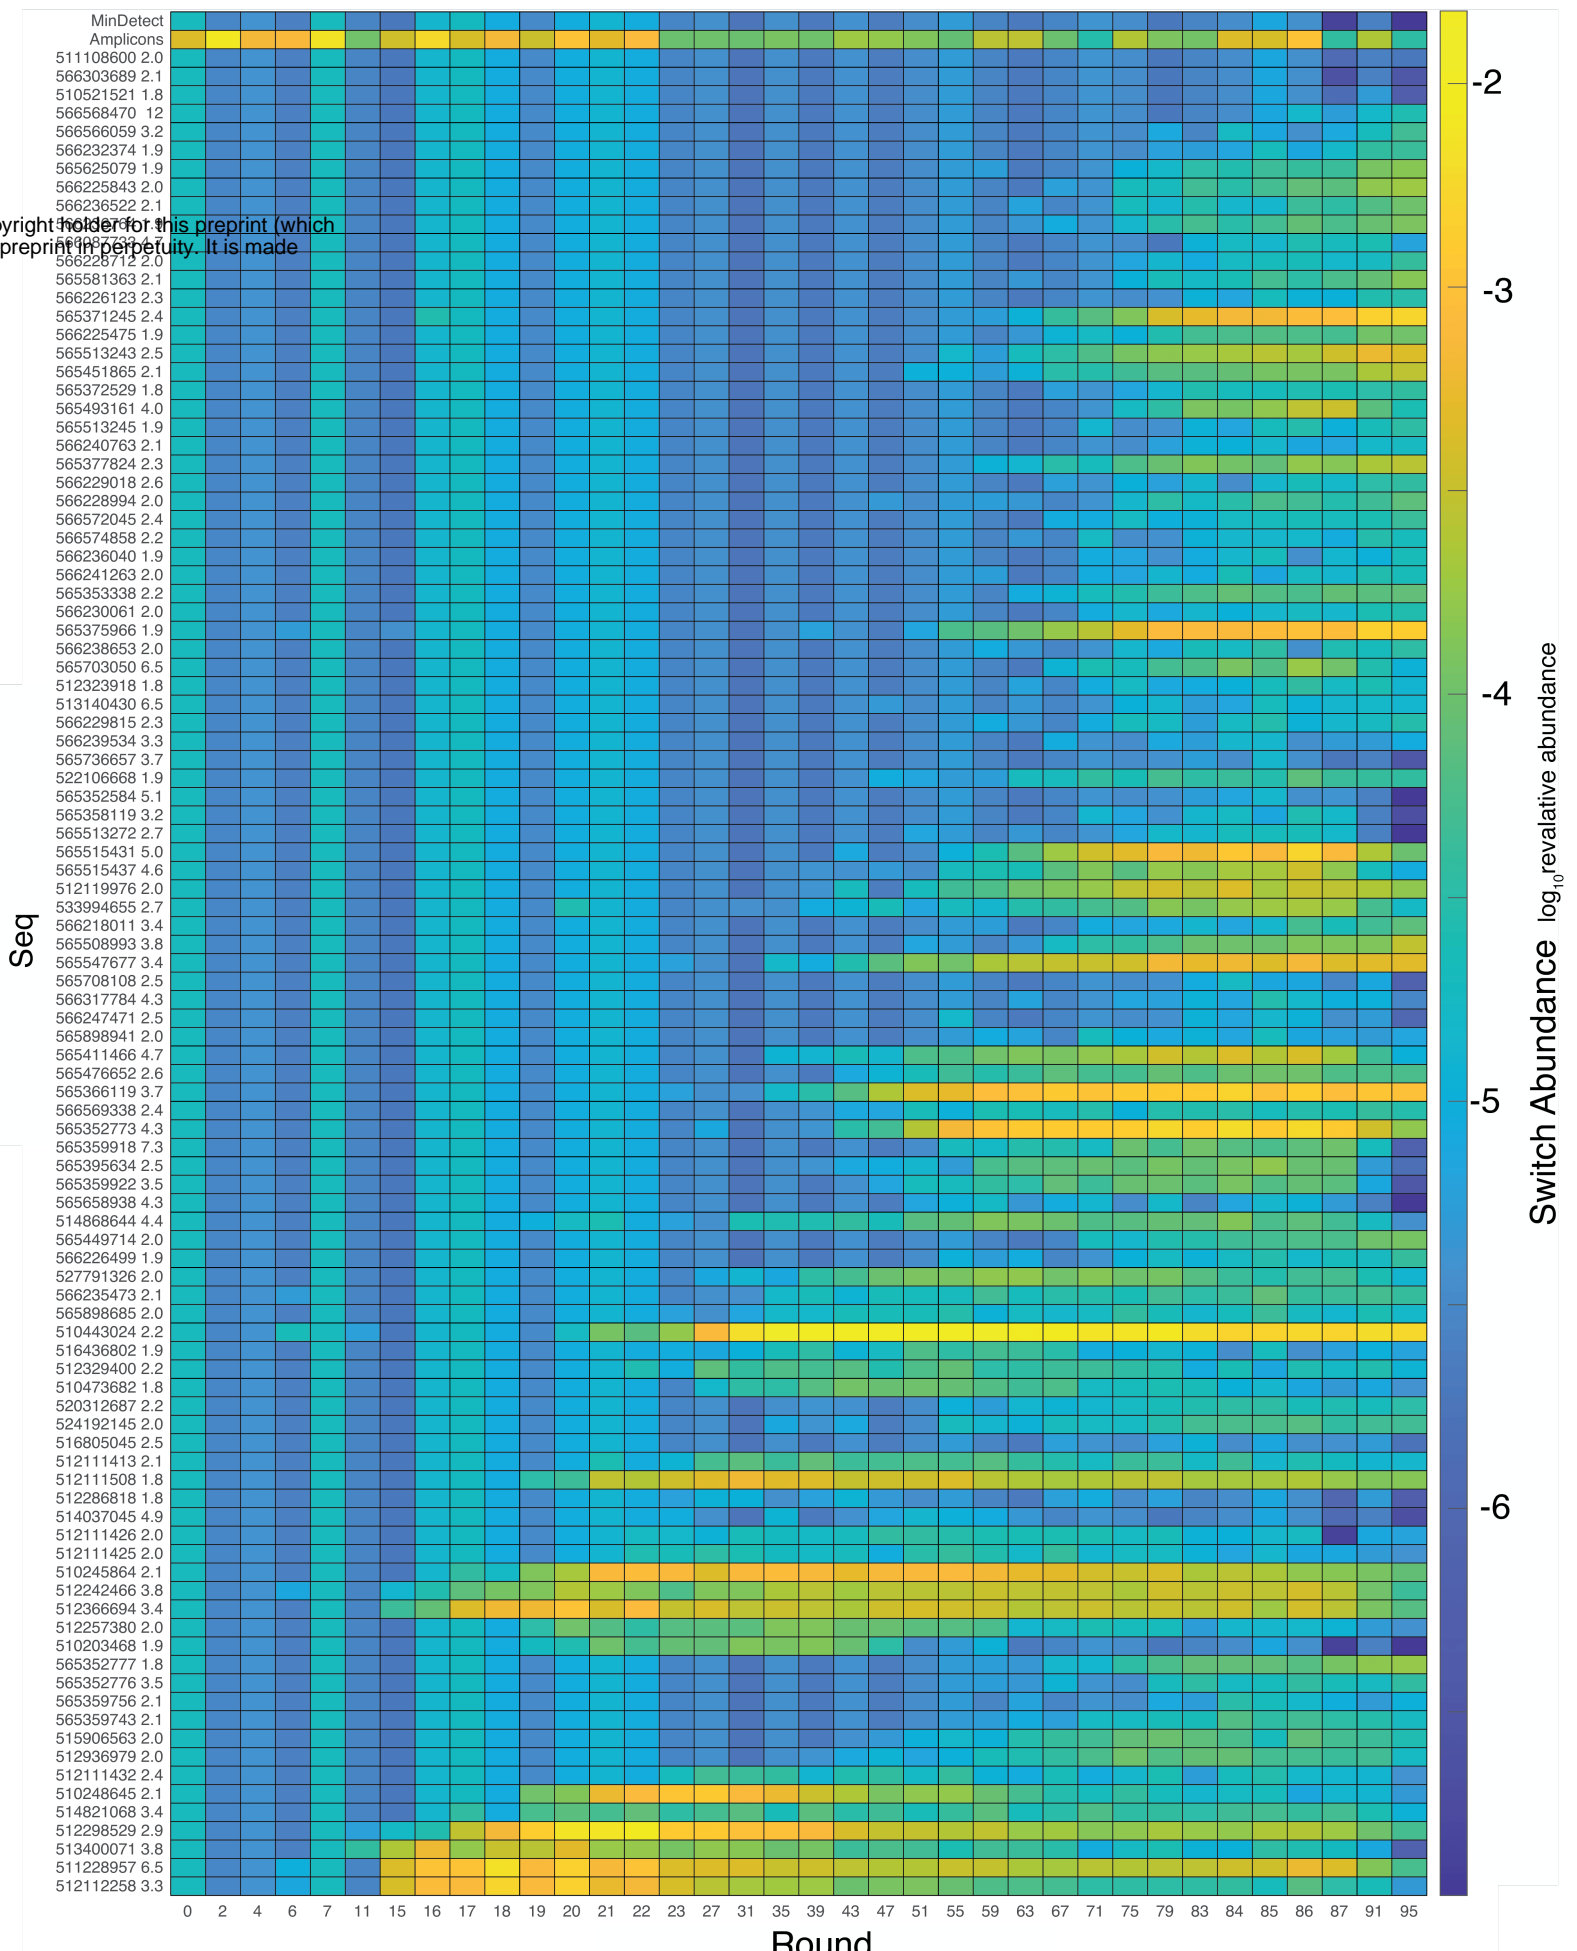



# Figure 9

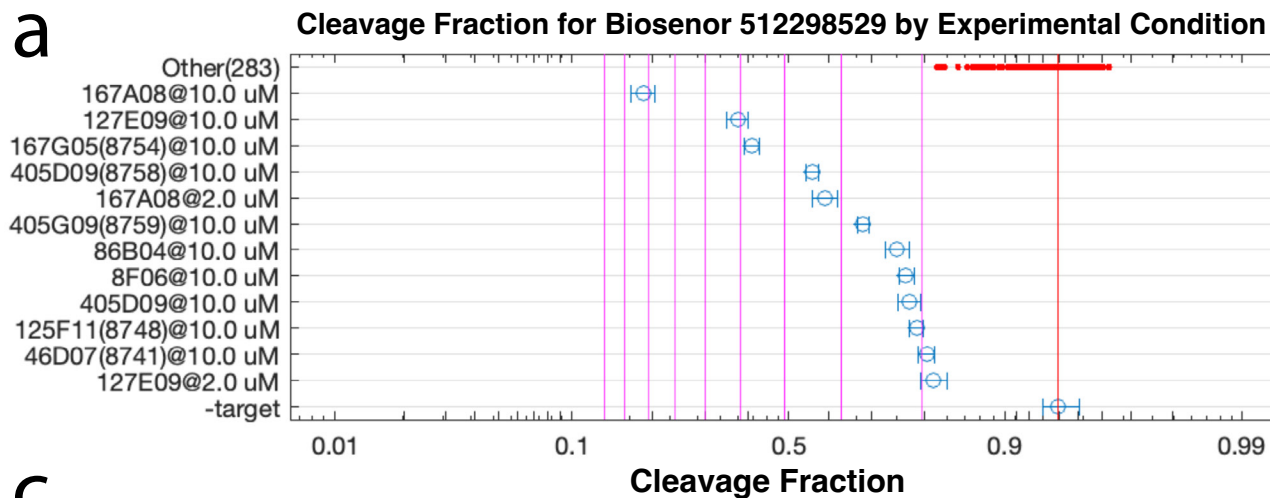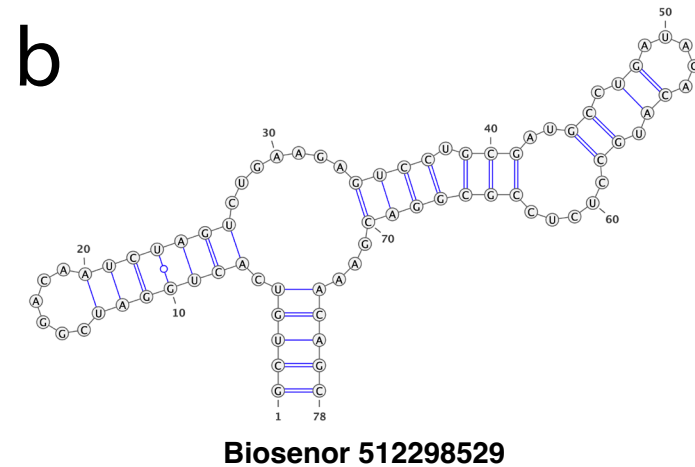

**C**

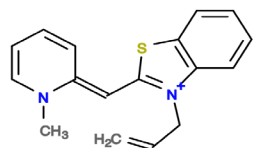

167A08

vector > 3.0 single = 8.2

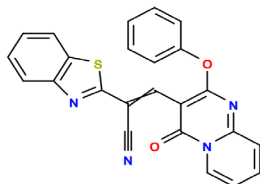

127E09

vector > 2.0 single = 5.1

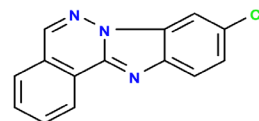

167G05

vector > 2.2 single = 4.7

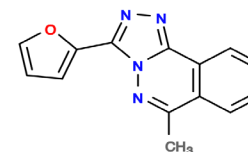

405D09

vector > 2.2 single = 3.4

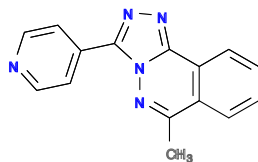

405G09

vector > 2.0 single = 2.7

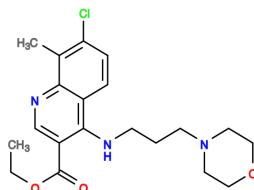

86B04

vector > 1.8 single = 2.3

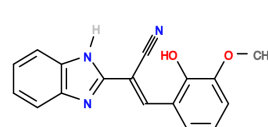

8F06

vector > 1.6 single = 2.2

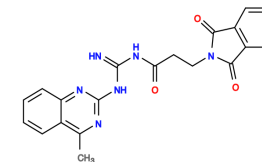

125F11

vector > 1.5 single = 2.1

# Figure 10

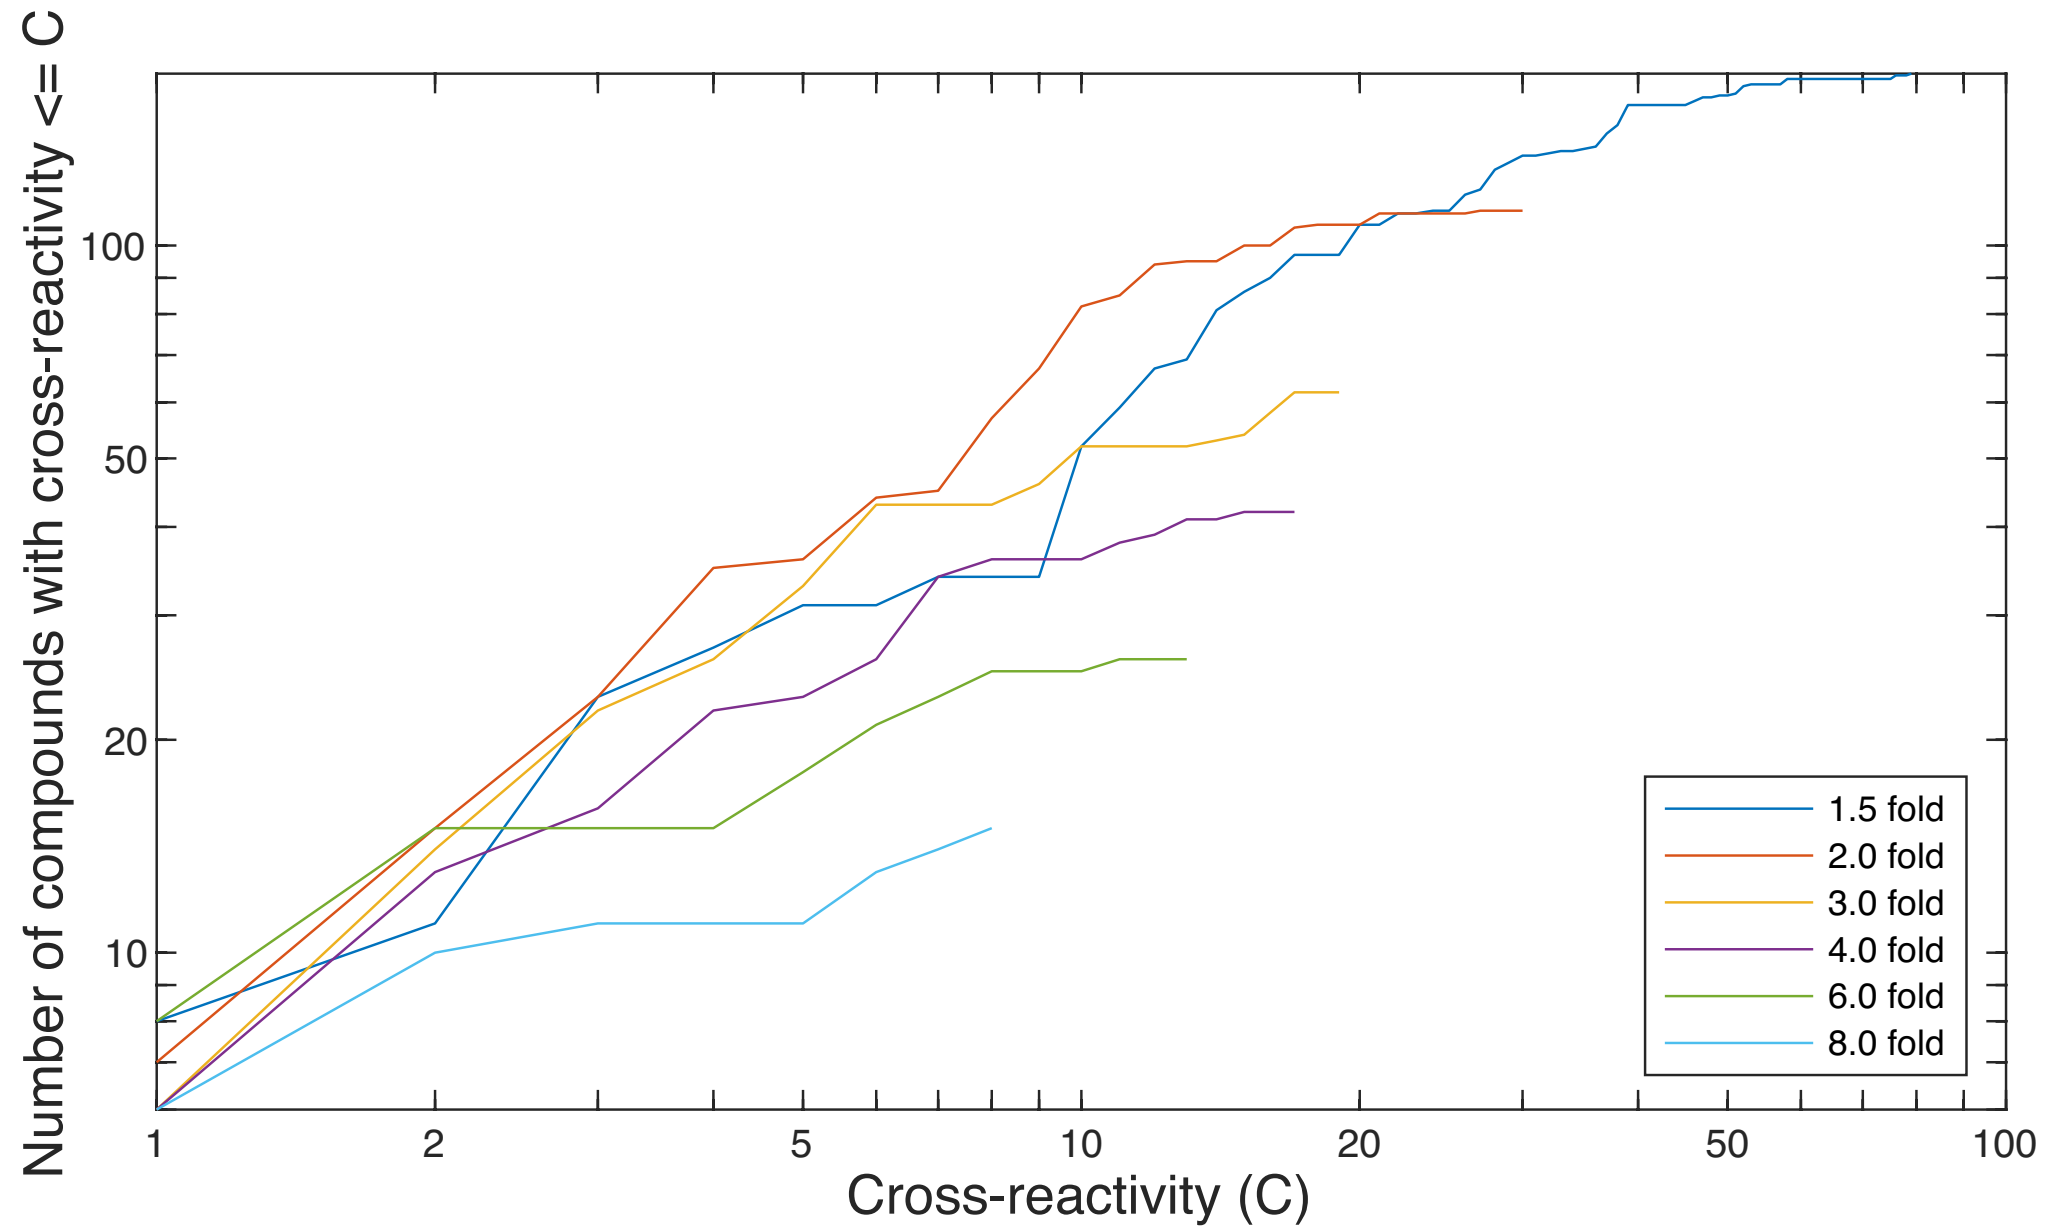

# Figure S1

a

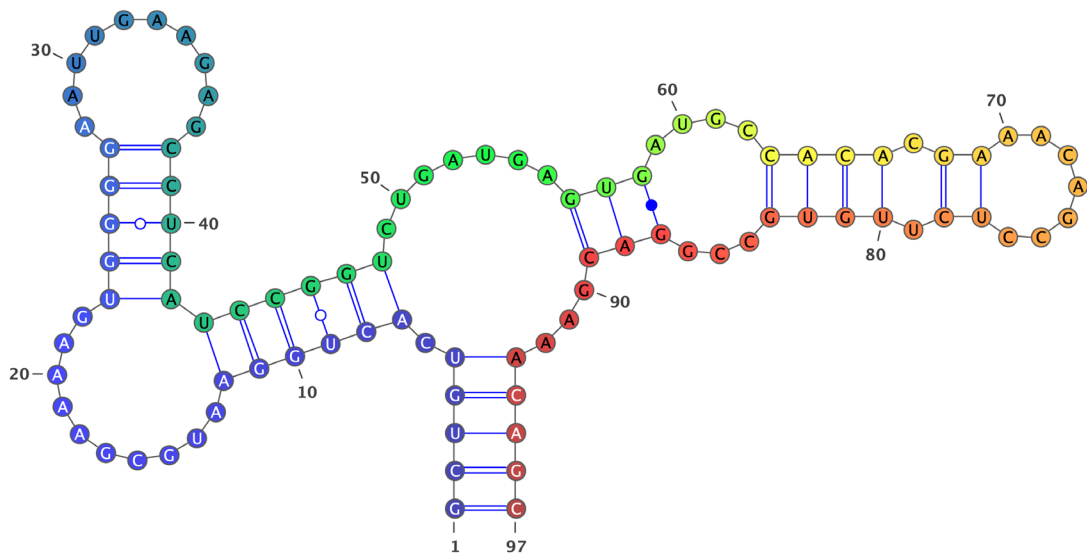

b

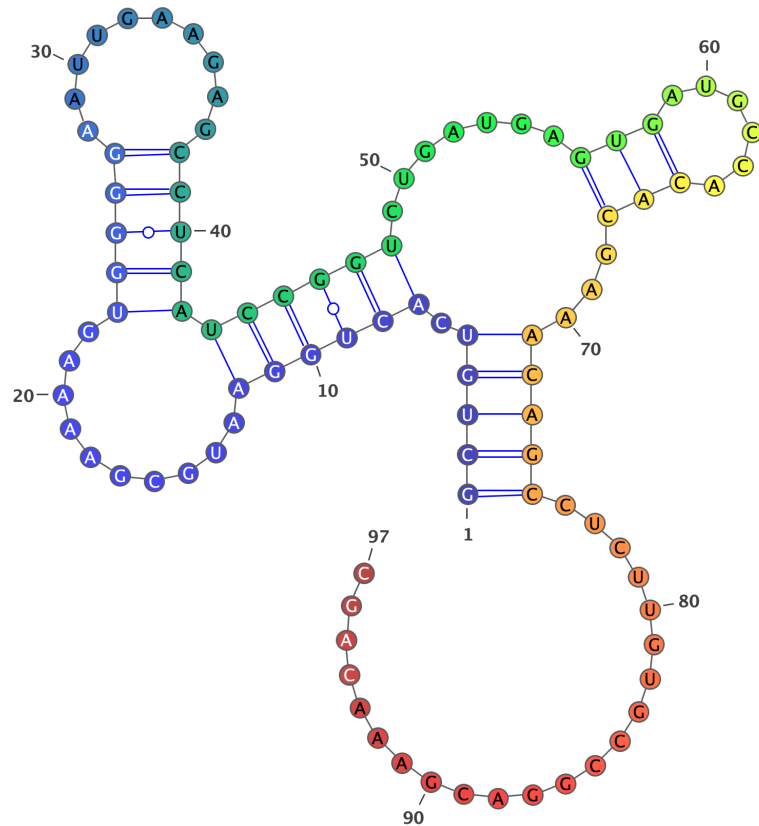

# Figure S2

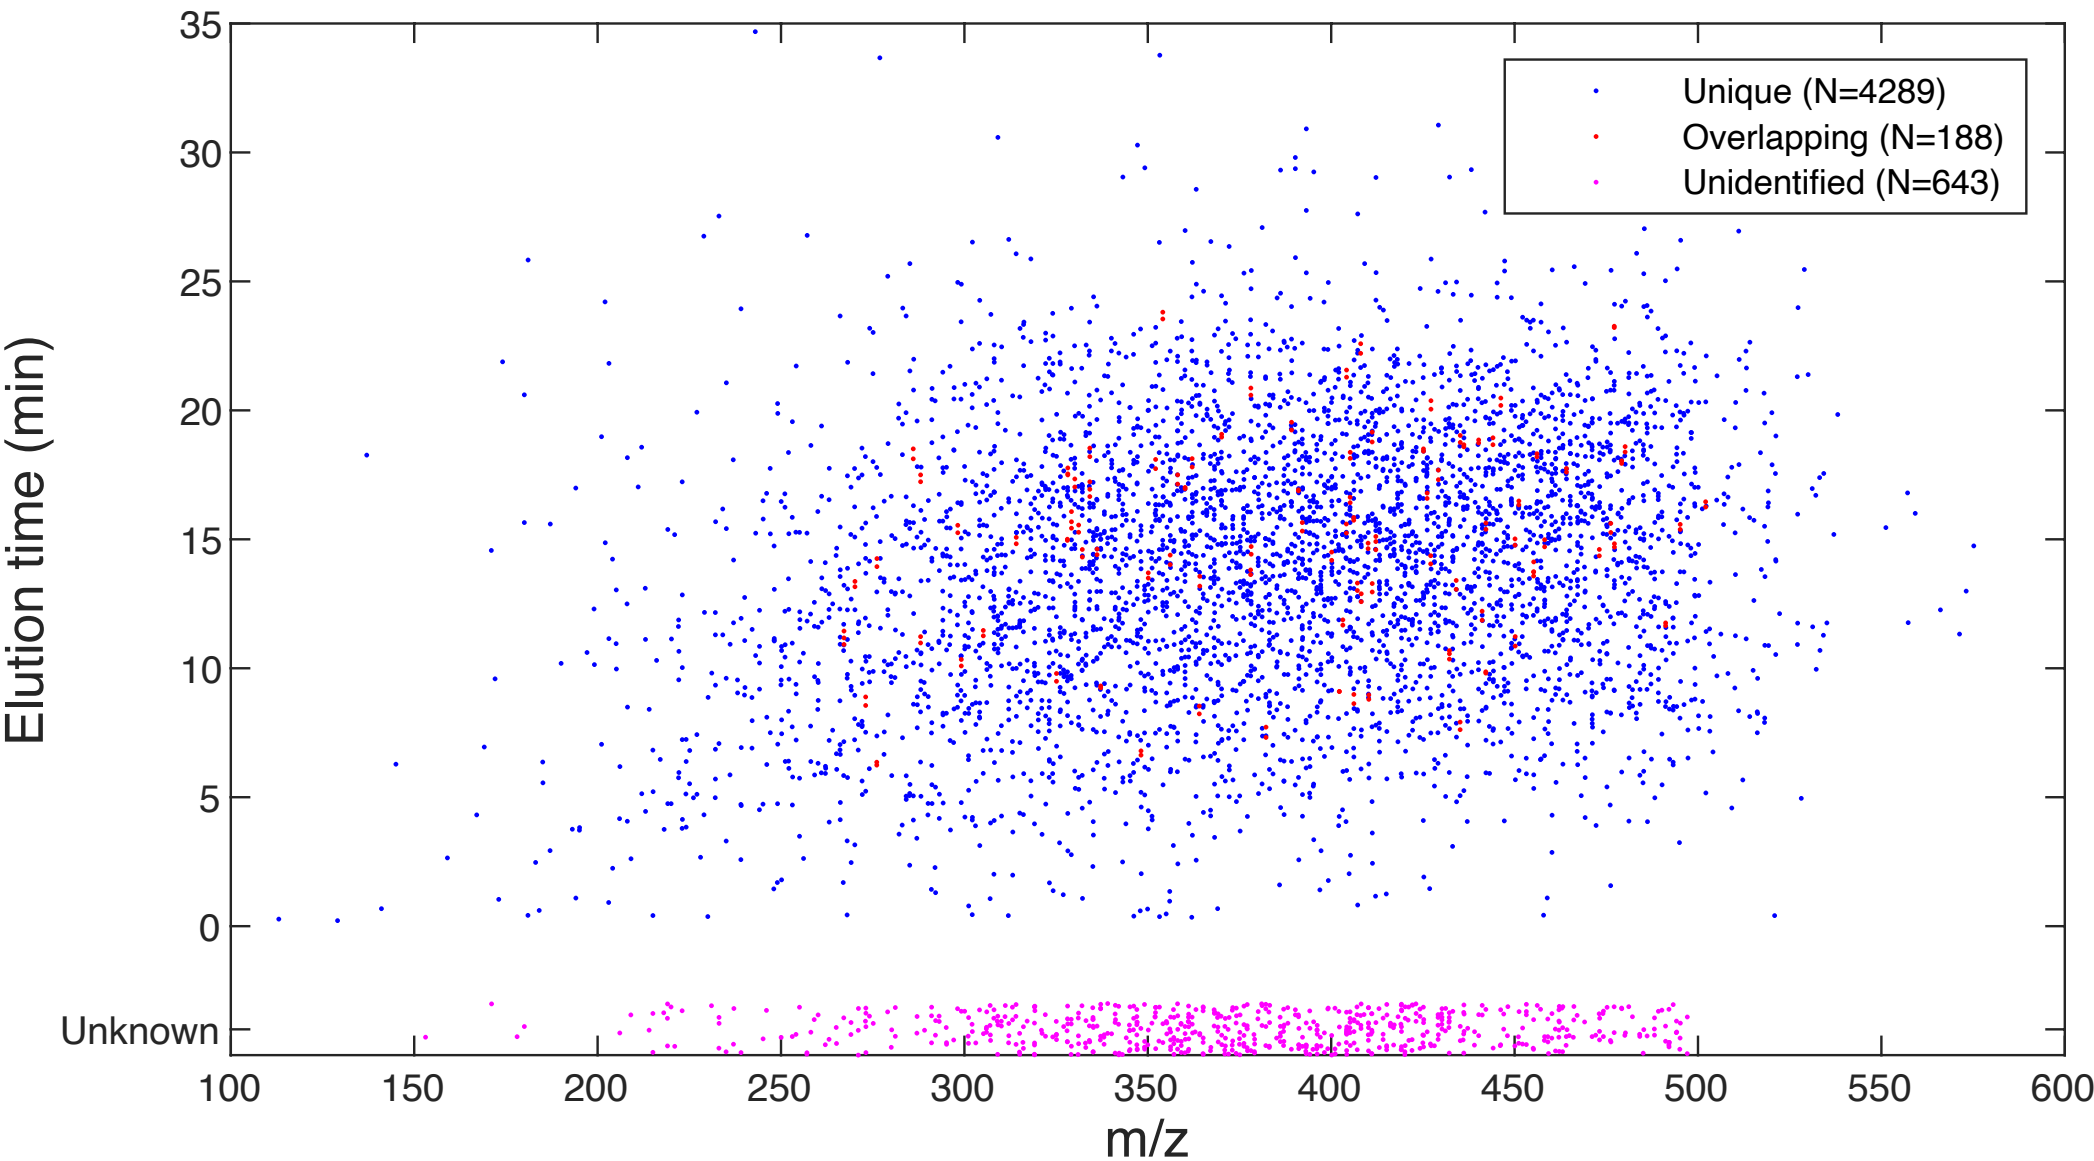

# Figure S3

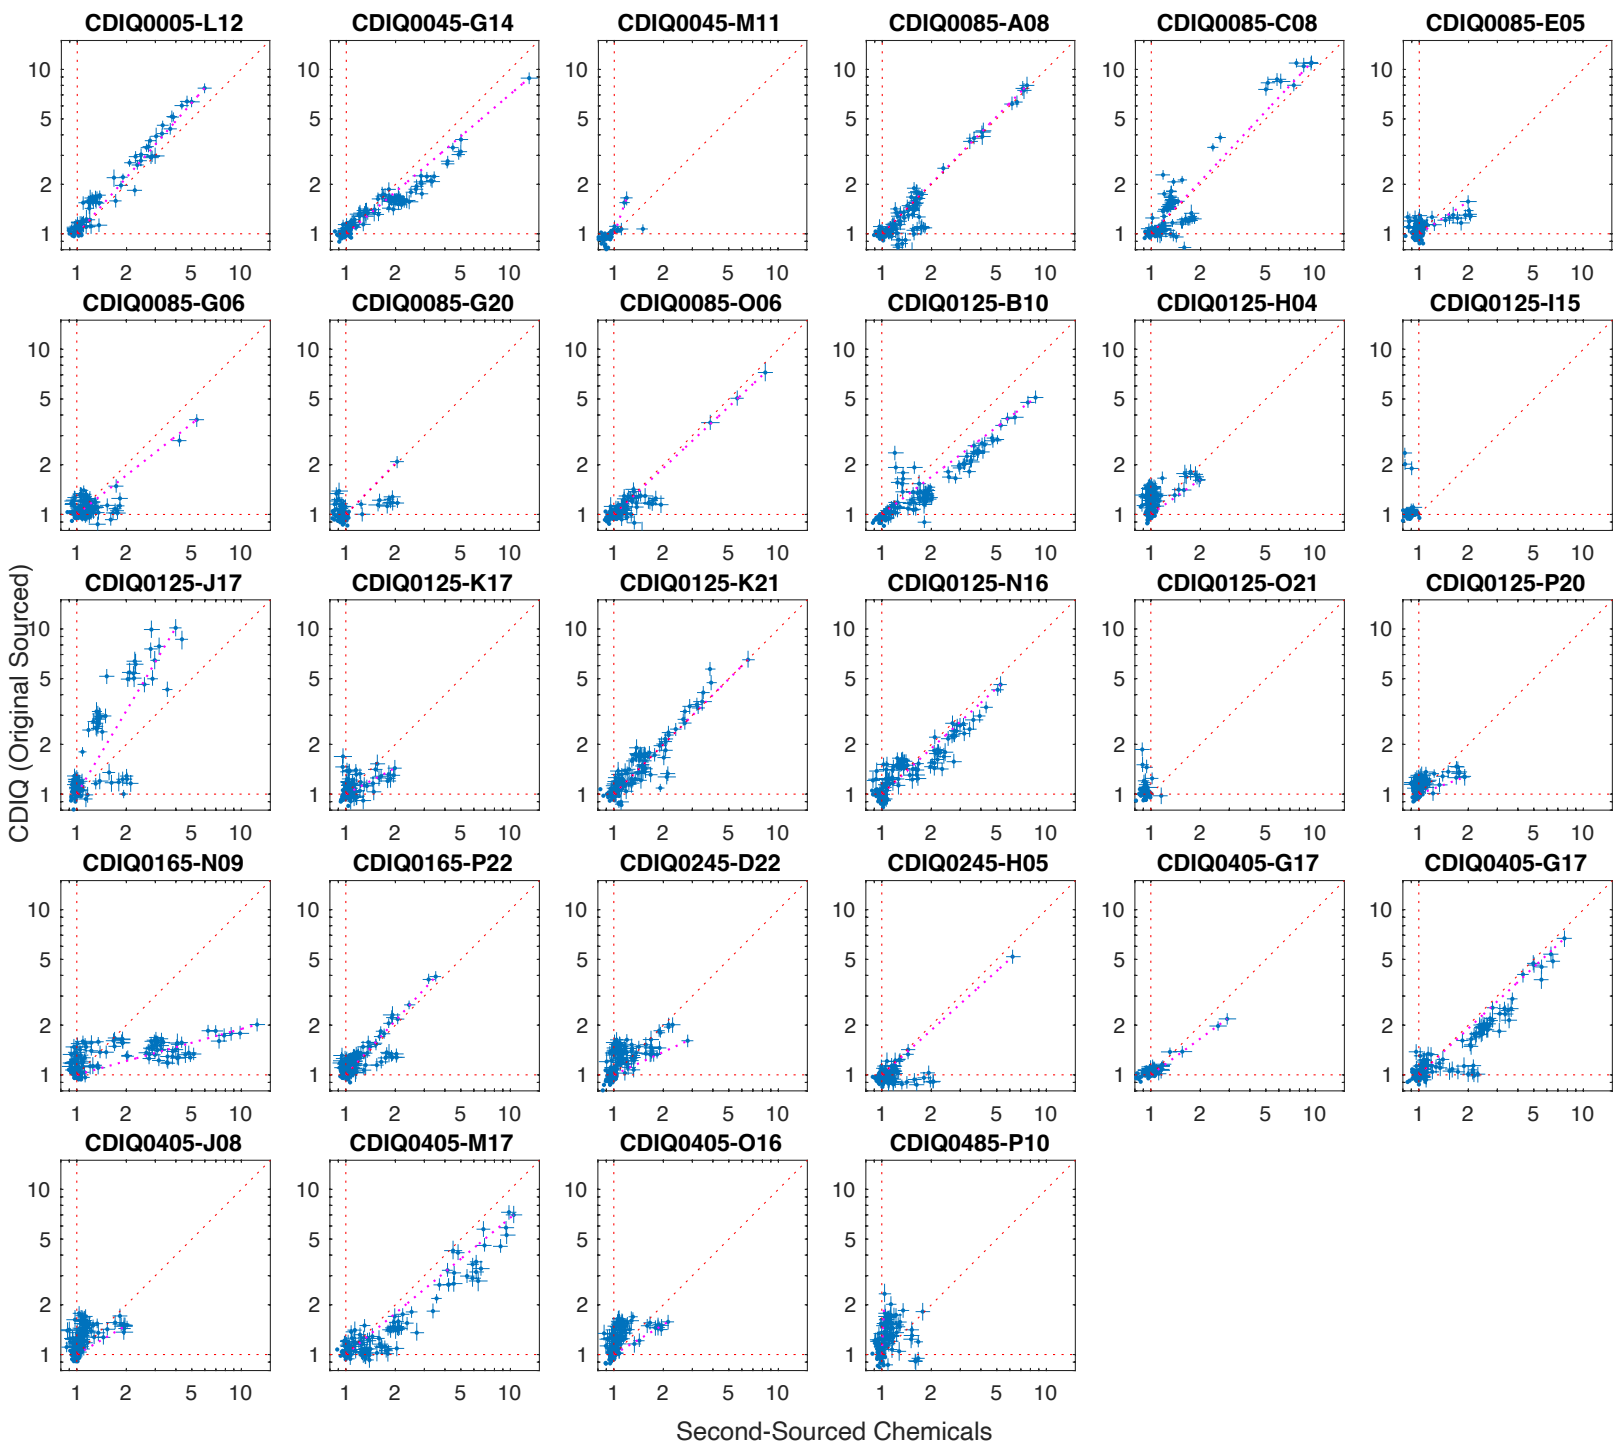

# Figure S1

a



b

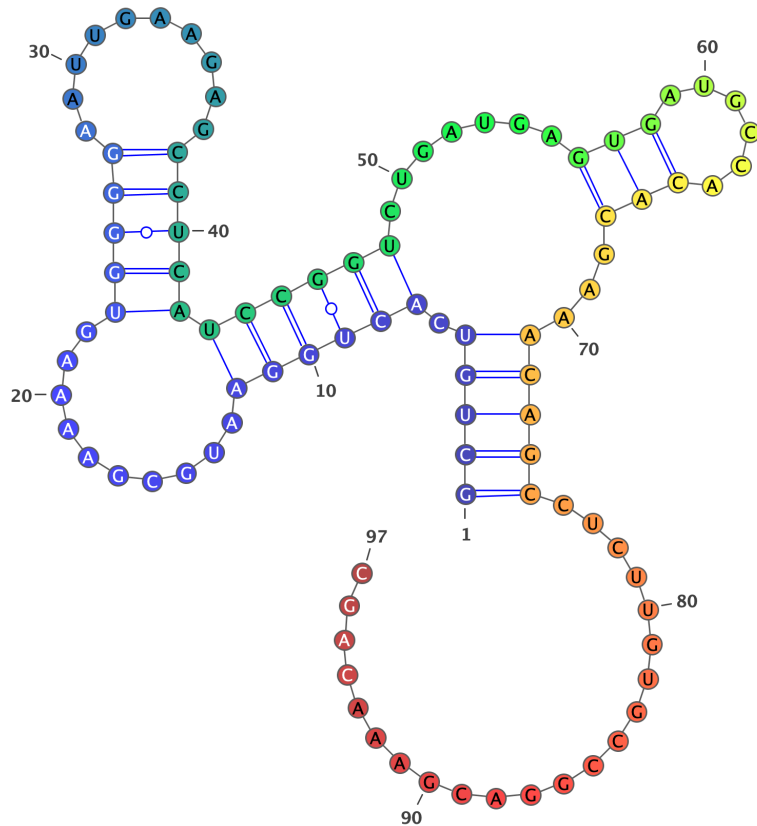

# Figure S2



# Figure S3



Source: https://www.biorxiv.org/content/10.1101/2022.07.16.500284v1.full.pdf
